# Supplementary material for: Clinicopathological Significance of Cyclin-Dependent Kinase 2 (CDK2) in Ductal Carcinoma In Situ and Early-Stage Invasive Breast Cancers
Source: MDPI journal article supplement (doi:10.3390/ijms25095053), 2024-05-06
Supplement: s1 [file s1]

**Supplementary Table S1.** Clinicopathological characteristics of the invasive breast cancer cohort

| <b>Variables</b>                   | <b>No (%)</b> |
|------------------------------------|---------------|
| <b>Age at diagnosis</b>            |               |
| <50                                | 137 (29%)     |
| ≥50                                | 342 (71%)     |
| <b>Menopausal status</b>           |               |
| Premenopausal                      | 156 (32%)     |
| Post-menopausal                    | 323 (68%)     |
| <b>Tumour size Groups</b>          |               |
| ≤ 2cm                              | 289 (60%)     |
| > 2cm                              | 190(40%)      |
| <b>Grade</b>                       |               |
| Grade 1                            | 84 (17%)      |
| Grade 2                            | 200 (42%)     |
| <b>Grade 3</b>                     | 195 (41%)     |
| <b>Tubule</b>                      |               |
| 1                                  | 39 (8%)       |
| 2                                  | 135 (28%)     |
| 3                                  | 305 (64%)     |
| <b>Polymorphism</b>                |               |
| 1                                  | 7 (1%)        |
| 2                                  | 158 (33%)     |
| 3                                  | 314 (66%)     |
| <b>Mitosis</b>                     |               |
| 1                                  | 259 (54%)     |
| 2                                  | 89 (19%)      |
| 3                                  | 131 (27%)     |
| <b>Histologic tumour types</b>     |               |
| No Special Type (NST)              | 300 (62%)     |
| Lobular                            | 51 (11%)      |
| Other special types                | 24 (5%)       |
| NST mixed                          | 104 (22%)     |
| <b>Lymphovascular invasion</b>     |               |
| Absent                             | 353 (74%)     |
| Present                            | 126 (26%)     |
| <b>Lymph node status</b>           |               |
| Absent                             | 309 (65%)     |
| Present                            | 170 (35%)     |
| <b>Nottingham prognostic index</b> |               |
| Good prognostic group              | 172 (36%)     |
| Moderate prognostic group          | 239 (50%)     |
| Poor prognostic group              | 68 (14%)      |
| <b>Ki67 expression</b>             |               |
| Low ≤ 14%                          | 201 (57%)     |
| High>14%                           | 152 (43%)     |
| <b>Molecular subtypes</b>          |               |
| Luminal A                          | 183 (45%)     |
| Luminal B                          | 141 (35%)     |
| HER2 enriched.                     | 21 (5%)       |

|                 |          |
|-----------------|----------|
| Triple negative | 63 (15%) |
|-----------------|----------|

**Supplementary Table S2.** Clinicopathological characteristics of the DCIS cohort

| <b>Categories</b>        | <b>Number (percentage)</b> |
|--------------------------|----------------------------|
| <b>Age</b>               |                            |
| <50                      | 59 (28%)                   |
| ≥50                      | 158 (72%)                  |
| <b>Tumour size</b>       |                            |
| ≤2cm                     | 88 (40%)                   |
| >2cm                     | 129 (60%)                  |
| <b>Tumour grade</b>      |                            |
| Low grade                | 29 (13%)                   |
| Intermediate grade       | 63 (29%)                   |
| High grade               | 125 (58%)                  |
| <b>Molecular subtype</b> |                            |
| Luminal A                | 90 (55%)                   |
| Luminal B                | 30 (19%)                   |
| HER2+                    | 27 (17%)                   |
| Triple Negative          | 15 (9%)                    |
| <b>Comedo necrosis</b>   |                            |
| Negative                 | 73 (34%)                   |
| Positive                 | 144 (66%)                  |
| <b>ER Status</b>         |                            |
| Negative                 | 45 (24%)                   |
| Positive                 | 139 (76%)                  |
| <b>PR Status</b>         |                            |
| Negative                 | 72 (39%)                   |
| Positive                 | 114 (61%)                  |
| <b>HER2 Status</b>       |                            |
| Negative                 | 86 (80%)                   |
| Positive                 | 21 (20%)                   |
| <b>Recurrence</b>        |                            |
| No recurrence            | 194 (89%)                  |
| Recurrence               | 23 (11%)                   |
| <b>Ki67 expression</b>   |                            |
| Low (≤14)                | 134 (75%)                  |

High (>14)

45 (25%)

---

HER2, human epidermal growth factor receptor 2      Significant P values are in bold.

**Supplementary Table S3.** Relationship between cytoplasmic CDK2 and clinicopathological parameters in invasive breast cancer.

| Variables                          | Cytoplasmic CDK2 expression   |                                | X <sup>2</sup><br>P-value |
|------------------------------------|-------------------------------|--------------------------------|---------------------------|
|                                    | Negative /low<br>H. score ≤70 | Positive/ high<br>H. score >70 |                           |
| <b>Age at diagnosis (years)</b>    |                               |                                |                           |
| <50                                | 70 (51%)                      | 67 (49%)                       | 0.06                      |
| ≥50                                | 179 (52%)                     | 163 (48%)                      | 0.8                       |
| <b>Menopausal state</b>            |                               |                                |                           |
| Premenopausal                      | 80 (51%)                      | 76 (49%)                       | 0.04                      |
| Post-menopausal                    | 169 (52%)                     | 154 (48%)                      | 0.83                      |
| <b>Tumour size (cm)</b>            |                               |                                |                           |
| ≤2                                 | 150 (52%)                     | 139 (48%)                      | 0.002                     |
| >2                                 | 99 (52%)                      | 91 (48%)                       | 0.96                      |
| <b>Histologic tumour grade</b>     |                               |                                |                           |
| Grade 1                            | 38 (45%)                      | 46 (55%)                       | 1.9                       |
| Grade 2                            | 108 (54%)                     | 92 (46%)                       | 0.38                      |
| Grade 3                            | 103 (53%)                     | 92 (47%)                       |                           |
| <b>Tubule formation</b>            |                               |                                |                           |
| 1                                  | 20 (51%)                      | 19 (49%)                       | 2.3                       |
| 2                                  | 63 (47%)                      | 72 (53%)                       | 0.3                       |
| 3                                  | 166 (54%)                     | 139 (46%)                      |                           |
| <b>Polymorphism</b>                |                               |                                |                           |
| 1                                  | 3 (43%)                       | 4 (57%)                        | 2.2                       |
| 2                                  | 75 (47%)                      | 83 (53%)                       | 0.32                      |
| 3                                  | 171 (54%)                     | 143 (46%)                      |                           |
| <b>Mitosis</b>                     |                               |                                |                           |
| 1                                  | 138 (53%)                     | 121 (47%)                      | 1.1                       |
| 2                                  | 48 (54%)                      | 41 (46%)                       | 0.58                      |
| 3                                  | 63 (48%)                      | 68 (52%)                       |                           |
| <b>Histologic tumour types</b>     |                               |                                |                           |
| No special type (NST)              | 148 (49%)                     | 152 (51%)                      |                           |
| Lobular                            | 33 (65%)                      | 18 (35%)                       | 4.3                       |
| Other special types                | 12 (50%)                      | 12 (50%)                       | 0.22                      |
| NST mixed                          | 56 (54%)                      | 48 (46%)                       |                           |
| <b>Molecular subtypes</b>          |                               |                                |                           |
| Luminal A                          | 94 (51%)                      | 89 (49%)                       | 0.7                       |
| Luminal B                          | 74 (53%)                      | 67 (47%)                       | 0.87                      |
| HER2 enriched.                     | 12 (57%)                      | 9 (43%)                        |                           |
| Triple negative                    | 30 (48%)                      | 33 (52%)                       |                           |
| <b>Lymph node invasion</b>         |                               |                                |                           |
| Absent                             | 158 (51%)                     | 151(49%)                       | 0.25                      |
| Present                            | 91 (54%)                      | 79 (46%)                       | 0.62                      |
| <b>Lymphovascular invasion</b>     |                               |                                |                           |
| Absent                             | 177 (51%)                     | 176 (49%)                      | 1.8                       |
| Present                            | 72 (57%)                      | 54 (43%)                       | 0.1                       |
| <b>Nottingham prognostic index</b> |                               |                                |                           |
| Good prognostic group              | 86 (50%)                      | 86 (50%)                       | 2.2                       |
| Moderate prognostic group          | 122 (51%)                     | 117 (49%)                      | 0.32                      |

|                       |           |          |     |
|-----------------------|-----------|----------|-----|
| Poor prognostic group | 41 (60%)  | 27 (40%) |     |
| <b>Ki67 index</b>     |           |          |     |
| Low $\leq 10\%$       | 103 (51%) | 98 (49%) | 0.1 |
| High $>10\%$          | 75 (49%)  | 77 (51%) | 0.7 |

**Supplementary Table S4.** Relationship between combination of nuclear (N)/ cytoplasmic (C) CDK2 co-expression and clinicopathological parameters in invasive breast cancer.

| Categories               | Negative N -<br>negative C CDK2 | Positive N -<br>negative C CDK2 | Positive N -<br>positive C CDK2 | Positive C –<br>negative N CDK2 | X <sup>2</sup><br><i>P</i> -value |
|--------------------------|---------------------------------|---------------------------------|---------------------------------|---------------------------------|-----------------------------------|
| <b>Age</b>               |                                 |                                 |                                 |                                 | 2.2                               |
| <50                      | 34 (25%)                        | 36 (26%)                        | 38 (28%)                        | 29 (21%)                        | 0.51                              |
| ≥50                      | 104 (30%)                       | 75 (22%)                        | 85 (25%)                        | 78 (23%)                        |                                   |
| <b>Menopausal status</b> |                                 |                                 |                                 |                                 | 0.5                               |
| Premenopausal            | 45 (29%)                        | 35 (22%)                        | 43 (28%)                        | 33 (21%)                        | 0.91                              |
| Post-menopausal          | 93 (28%)                        | 76 (24%)                        | 80 (25%)                        | 74 (23%)                        |                                   |
| <b>Tumour size</b>       |                                 |                                 |                                 |                                 | 5.7                               |
| ≤ 2cm                    | 92 (32%)                        | 58 (20%)                        | 72 (25%)                        | 67 (23%)                        | 0.12                              |
| > 2cm                    | 46 (24%)                        | 53 (28%)                        | 51 (27%)                        | 40 (21%)                        |                                   |
| <b>Tumour grade</b>      |                                 |                                 |                                 |                                 |                                   |
| Grade 1                  | 25 (30%)                        | 13 (15%)                        | 13 (16%)                        | 33 (39%)                        | 49.8                              |
| Grade 2                  | 66 (33%)                        | 42 (21%)                        | 38 (19%)                        | 54 (27%)                        | <0.0001                           |
| Grade 3                  | 47 (24%)                        | 56 (29%)                        | 72 (37%)                        | 20 (10%)                        |                                   |
| <b>Tubule</b>            |                                 |                                 |                                 |                                 |                                   |
| 1                        | 14 (36%)                        | 6 (15%)                         | 4 (10%)                         | 15 (39%)                        | 18.214                            |
| 2                        | 32 (24%)                        | 31 (23%)                        | 33 (24%)                        | 39 (29%)                        | 0.006                             |
| 3                        | 92 (30%)                        | 74 (24%)                        | 86 (28%)                        | 53 (18%)                        |                                   |

|                       |          |          |          |          |         |
|-----------------------|----------|----------|----------|----------|---------|
| Polymorphism          |          |          |          |          |         |
| 1                     | 1 (13%)  | 2 (29%)  | 2 (29%)  | 2 (29%)  | 33.66   |
| 2                     | 45 (29%) | 30 (19%) | 25 (16%) | 58 (36%) | <0.0001 |
| 3                     | 92 (29%) | 79 (25%) | 96 (31%) | 47 (15%) |         |
| Mitosis               |          |          |          |          |         |
| 1                     | 87 (33%) | 51 (20%) | 43 (17%) | 78 (30%) | 48.6    |
| 2                     | 22 (25%) | 26 (29%) | 24 (27%) | 17 (19%) | <0.0001 |
| 3                     | 29 (22%) | 34 (26%) | 56 (43%) | 12 (9%)  |         |
| Histologic types      |          |          |          |          |         |
| No special type (NST) | 77 (26%) | 71 (24%) | 96 (32%) | 56 (18%) | 29.4    |
| Lobular               | 17 (33%) | 16 (31%) | 6 (12%)  | 12 (24%) |         |
| Other special types   | 5 (21%)  | 7 (29%)  | 2 (8%)   | 10 (42%) |         |
| Mixed NST             | 39 (38%) | 17 (16%) | 19 (18%) | 29 (28%) |         |
| Molecular subtype     |          |          |          |          |         |
| Luminal A             | 59 (32%) | 35 (19%) | 33 (18%) | 56 (31%) | 27.7    |
| Luminal B             | 38 (27%) | 36 (26%) | 41 (29%) | 26 (18%) | 0.001   |
| HER2 +                | 6 (29%)  | 6 (29%)  | 7 (33%)  | 2 (9%)   |         |
| Triple negative       | 17 (27%) | 13 (20%) | 27 (43%) | 6 (10%)  |         |
| Lymph node status     |          |          |          |          |         |
| Negative              | 97 (31%) | 61 (20%) | 77 (25%) | 74 (24%) | 7.6     |
| Positive              | 41 (24%) | 50 (29%) | 46 (27%) | 33 (20%) | 0.05    |



|                                                                                       |           |          |          |          |                   |
|---------------------------------------------------------------------------------------|-----------|----------|----------|----------|-------------------|
| <b>Lymphovascular invasion</b>                                                        |           |          |          |          |                   |
| <b>Absent</b>                                                                         | 102 (29%) | 75 (21%) | 85 (24%) | 91 (26%) | 10.6              |
| <b>Present</b>                                                                        | 36 (29%)  | 36 (29%) | 38 (30%) | 16 (12%) | <b>0.01</b>       |
| <b>Nottingham Prognostic Index</b>                                                    |           |          |          |          |                   |
| <b>Good prognostic group</b>                                                          | 58 (34%)  | 28 (16%) | 31 (18%) | 55 (32%) | 30.5              |
| <b>Moderate prognostic group</b>                                                      | 64 (27%)  | 58 (24%) | 72 (30%) | 45 (19%) | <b>&lt;0.0001</b> |
| <b>Poor prognostic group</b>                                                          | 16 (24%)  | 25 (37%) | 20 (29%) | 7 (10%)  |                   |
| <b>Ki67 expression</b>                                                                |           |          |          |          | 9.7               |
| <b>Low≤14</b>                                                                         | 64 (32%)  | 39 (19%) | 41 (20%) | 57 (29%) | <b>0.021</b>      |
| <b>High&gt;14</b>                                                                     | 38 (25%)  | 37 (24%) | 48 (32%) | 29 (19%) |                   |
| HER2, human epidermal growth factor receptor 2      Significant P values are in bold. |           |          |          |          |                   |

**Supplementary Table S5.** Relationship between combination of nuclear CDK2/P53 co-expression and clinicopathological parameters in invasive breast cancer.

|                          | CDK2-/P53- | CDK2+/P53- | CDK2+ /P53+ | CDK2-/P53+ | X <sup>2</sup>    |
|--------------------------|------------|------------|-------------|------------|-------------------|
| Categories               |            |            |             |            | P-value           |
| <b>Age</b>               |            |            |             |            | 8.8               |
| <50                      | 42 (33%)   | 35 (28%)   | 32 (25%)    | 17 (14%)   | <b>0.03</b>       |
| ≥50                      | 111 (39%)  | 100 (35%)  | 40 (14%)    | 33 (12%)   |                   |
| <b>Menopausal status</b> |            |            |             |            | 2.7               |
| Premenopausal            | 49 (35%)   | 42 (30%)   | 30 (22%)    | 18 (13%)   | 0.42              |
| Post-menopausal          | 104 (39%)  | 93 (34%)   | 42 (15%)    | 32 (12%)   |                   |
| <b>Tumour size</b>       |            |            |             |            | 4.6               |
| ≤ 2cm                    | 96 (40%)   | 80 (33%)   | 35 (14%)    | 32 (13%)   | 0.2               |
| > 2cm                    | 57 (34%)   | 55 (33%)   | 37 (22%)    | 18 (11%)   |                   |
| <b>Tumour grade</b>      |            |            |             |            |                   |
| Grade 1                  | 41 (59%)   | 17 (24%)   | 4 (6%)      | 8 (11%)    | 77.1              |
| Grade 2                  | 79 (48%)   | 58 (35%)   | 9 (6%)      | 18 (11%)   | <b>&lt;0.0001</b> |
| Grade 3                  | 33 (19%)   | 60 (34%)   | 59 (34%)    | 24 (13%)   |                   |
| <b>Tubule</b>            |            |            |             |            |                   |
| 1                        | 21 (61%)   | 5 (15%)    | 3 (9%)      | 5 (15%)    | 28.4              |
| 2                        | 50 (44%)   | 45 (40%)   | 9 (8%)      | 9 (8%)     | <b>&lt;0.0001</b> |
| 3                        | 82 (31%)   | 85 (32%)   | 60 (23%)    | 36 (14%)   |                   |
| <b>Polymorphism</b>      |            |            |             |            |                   |

|                       |           |          |          |          |         |
|-----------------------|-----------|----------|----------|----------|---------|
| 1                     | 3 (43%)   | 4 (57%)  | 0 (0%)   | 0 (0%)   | 37.1    |
| 2                     | 71 (55%)  | 37 (28%) | 7 (5%)   | 15 (12%) | <0.0001 |
| 3                     | 79 (29%)  | 94 (34%) | 65 (24%) | 35 (13%) |         |
| Mitosis               |           |          |          |          |         |
| 1                     | 109 (52%) | 66 (31%) | 12 (6%)  | 24 (11%) | 65.7    |
| 2                     | 24 (31%)  | 26 (33%) | 18 (23%) | 10 (13%) | <0.0001 |
| 3                     | 20 (16%)  | 43 (36%) | 42 (35%) | 16 (13%) |         |
| Histologic types      |           |          |          |          |         |
| No special type (NST) | 78 (30%)  | 91 (34%) | 65 (24%) | 32 (12%) | 38.18   |
| Lobular               | 21 (51%)  | 16 (39%) | 2 (5%)   | 2 (5%)   |         |
| Other special types   | 10 (47%)  | 6 (29%)  | 1 (5%)   | 4 (19%)  |         |
| Mixed NST             | 44 (54%)  | 22 (27%) | 4 (5%)   | 12 (14%) |         |
| Molecular subtype     |           |          |          |          |         |
| Luminal A             | 79 (53%)  | 46 (31%) | 10 (7%)  | 14 (9%)  | 64.8    |
| Luminal B             | 40 (32%)  | 50 (40%) | 21 (17%) | 15 (11%) | <0.0001 |
| Triple negative       | 11 (20%)  | 12 (21%) | 24 (43%) | 9 (16%)  |         |
| HER2 +                | 2 (11%)   | 4 (22%)  | 9 (50%)  | 3 (17%)  |         |
| Lymph node status     |           |          |          |          |         |
| Negative              | 108 (41%) | 83 (32%) | 38 (14%) | 35 (13%) | 7.9     |
| Positive              | 45 (31%)  | 52 (36%) | 34 (23%) | 15 (10%) | 0.04    |

|                                                                                       |           |          |          |          |                   |
|---------------------------------------------------------------------------------------|-----------|----------|----------|----------|-------------------|
| <b>Lymphovascular invasion</b>                                                        |           |          |          |          |                   |
| Absent                                                                                |           |          |          |          | 8.39              |
| Present                                                                               | 123 (42%) | 90 (30%) | 48 (16%) | 37 (12%) | <b>0.03</b>       |
|                                                                                       | 30 (27%)  | 45 (40%) | 24 (21%) | 13 (12%) |                   |
| <b>Nottingham Prognostic Index</b>                                                    |           |          |          |          |                   |
| Good prognostic group                                                                 |           |          |          |          | 37.87             |
| Moderate prognostic group                                                             | 74 (52%)  | 41 (29%) | 7 (5%)   | 20 (14%) | <b>&lt;0.0001</b> |
| Poor prognostic group                                                                 | 67 (31%)  | 72 (35%) | 47 (23%) | 22 (11%) |                   |
|                                                                                       | 12 (20%)  | 22 (37%) | 18 (30%) | 8 (13%)  |                   |
| <b>Ki67 expression</b>                                                                |           |          |          |          |                   |
| Low≤14                                                                                | 81 (51%)  | 50 (31%) | 15 (9%)  | 15 (9%)  | 22.1              |
| High>14                                                                               | 40 (29%)  | 44 (32%) | 37 (27%) | 17 (12%) | <b>&lt;0.0001</b> |
| HER2, human epidermal growth factor receptor 2      Significant P values are in bold. |           |          |          |          |                   |

**Supplementary Table S6.** Clinicopathological significance of nuclear CDK2 and nuclear CDK4 co-expression in breast cancers.

|                  | CDK2-/CDK4- | CDK2+/CDK4+ | CDK2+/CDK4- | CDK2-/CDK4+ | X2      |
|------------------|-------------|-------------|-------------|-------------|---------|
|                  |             |             |             |             | P-value |
| Tumour size      |             |             |             |             |         |
| ≤ 2cm            | 50 (63%)    | 81 (56%)    | 38 (55%)    | 90 (65%)    | 3.46    |
| > 2cm            | 29 (37%)    | 63 (44%)    | 31 (45%)    | 48 (35%)    | 0.326   |
| Tumour grade     |             |             |             |             |         |
| Grade 1          | 9 (11%)     | 20 (14%)    | 4 (6%)      | 41 (30%)    | 60.21   |
| Grade2           | 43 (55%)    | 58 (40%)    | 14 (20%)    | 63 (45%)    | <0.0001 |
| Grade 3          | 27 (34%)    | 66 (46%)    | 51 (74%)    | 34 (25%)    |         |
| Tubule formation |             |             |             |             |         |
| 1                | 6 (8%)      | 6 (4%)      | 3 (4%)      | 19 (14%)    | 18.86   |
| 2                | 21 (26%)    | 47 (33%)    | 12 (18%)    | 45 (33%)    | 0.004   |
| 3                | 52 (66%)    | 91 (63%)    | 54 (78%)    | 74 (53%)    |         |
| Pleomorphism     |             |             |             |             |         |
| 1                | 0 (0%)      | 4 (3%)      | 0 (0%)      | 3 (2%)      | 42.80   |
| 2                | 21 (27%)    | 40 (28%)    | 8 (12%)     | 70 (51%)    | <0.0001 |
| 3                | 58 (73%)    | 100 (69%)   | 61 (88%)    | 65 (47%)    |         |
| Mitosis          |             |             |             |             |         |
| 1                | 45 (57%)    | 71 (49%)    | 14 (20%)    | 99 (72%)    | 52.29   |
| 2                | 16 (20%)    | 27 (19%)    | 20 (29%)    | 18 (13%)    | <0.0001 |

|                             |          |           |          |           |         |
|-----------------------------|----------|-----------|----------|-----------|---------|
| 3                           | 18 (23%) | 46 (32%)  | 35 (51%) | 21 (15%)  |         |
| Histologic types            |          |           |          |           |         |
| No special type (NST)       | 55 (70%) | 92 (64%)  | 60 (87%) | 68 (49%)  | 35.25   |
| Lobular                     | 8 (10%)  | 17 (12%)  | 2 (3%)   | 14 (10%)  | <0.0001 |
| Other special types         | 5 (6%)   | 7 (5%)    | 1 (1%)   | 9 (7%)    |         |
| Mixed NST                   | 11 (14%) | 28 (19%)  | 6 (9%)   | 47 (34%)  |         |
| Lymph node status           |          |           |          |           |         |
| Absent                      | 51 (65%) | 82 (57%)  | 43 (62%) | 99 (72%)  | 6.79    |
| Present                     | 28 (35%) | 62 (43%)  | 26 (38%) | 39 (28%)  | 0.079   |
| Lymphovascular invasion     |          |           |          |           |         |
| Absent                      | 62 (79%) | 97 (67%)  | 46 (67%) | 109 (79%) | 7.44    |
| Present                     | 17 (21%) | 47 (33%)  | 23 (33%) | 29 (21%)  | 0.059   |
| Nottingham Prognostic index |          |           |          |           |         |
| Good prognostic group       | 29 (37%) | 41 (28%)  | 12 (17%) | 69 (50%)  | 28.73   |
| Moderate prognostic group   | 43 (54%) | 77 (54%)  | 44 (64%) | 56 (41%)  | <0.0001 |
| Poor prognostic group       | 7 (9%)   | 26 (18%)  | 13 (19%) | 13 (9%)   |         |
| ER status                   |          |           |          |           |         |
| Negative                    | 15 (19%) | 24 (17%)  | 24 (35%) | 16 (12%)  | 16.68   |
| Positive                    | 64 (81%) | 119 (83%) | 45 (65%) | 121 (88%) | 0.001   |
| PgR status                  |          |           |          |           |         |
| Negative                    | 25 (32%) | 48 (34%)  | 35 (51%) | 47 (34%)  | 8.01    |

|                           |          |           |          |           |         |
|---------------------------|----------|-----------|----------|-----------|---------|
| <b>Positive</b>           | 52 (68%) | 95 (66%)  | 33 (49%) | 91 (66%)  | 0.046   |
| <b>HER2 status</b>        |          |           |          |           |         |
| <b>Negative</b>           | 70 (89%) | 127 (89%) | 53 (77%) | 127 (92%) | 10.32   |
| <b>Positive</b>           | 9 (11%)  | 16 (11%)  | 16 (23%) | 11 (8%)   | 0.016   |
| <b>Ki67 expression</b>    |          |           |          |           |         |
| <b>Low≤14</b>             | 30 (54%) | 58 (53%)  | 14 (33%) | 80 (71%)  | 20.02   |
| <b>High&gt;14</b>         | 26 (46%) | 51 (47%)  | 28 (67%) | 32 (29%)  | <0.0001 |
| <b>Molecular subtypes</b> |          |           |          |           |         |
| <b>Luminal A</b>          | 28 (42%) | 54 (44%)  | 76 (63%) | 9 (15%)   | 41.67   |
| <b>Luminal B</b>          | 27 (41%) | 45 (37%)  | 30 (25%) | 27 (46%)  | <0.0001 |
| <b>Triple negative</b>    | 9 (14%)  | 18 (14%)  | 10 (8%)  | 17 (29%)  |         |
| <b>HER2 +</b>             | 2 (3%)   | 6 (5%)    | 5 (4%)   | 6 (10%)   |         |
| <b>Menopausal status</b>  |          |           |          |           |         |
| <b>Premenopausal</b>      | 30 (38%) | 48 (33%)  | 27 (39%) | 36 (26%)  | 5.05    |
| <b>Postmenopausal</b>     | 49 (62%) | 96 (67%)  | 42 (61%) | 102 (74%) | 0.168   |
| <b>Age at diagnosis</b>   |          |           |          |           |         |
| <b>&lt;50</b>             | 29 (37%) | 48 (33%)  | 23 (33%) | 26 (19%)  | 11.05   |
| <b>≥50</b>                | 50 (63%) | 96 (67%)  | 46 (67%) | 112 (81%) | 0.011   |

**Supplementary Table S7.** Clinicopathological significance of nuclear CDK2 and nuclear CDK6 co-expression in breast cancers.

|                         | CDK2-/CDK6- | CDK2+/CDK6+ | CDK2+/CDK6- | CDK2-/CDK6+ | X <sup>2</sup><br>P-value |
|-------------------------|-------------|-------------|-------------|-------------|---------------------------|
| Tumour size             |             |             |             |             |                           |
| ≤ 2cm                   | 90 (63%)    | 39 (65%)    | 71 (53%)    | 42 (64%)    | 4.75                      |
| > 2cm                   | 52 (37%)    | 21 (35%)    | 64 (47%)    | 24 (36%)    | 0.191                     |
| Tumour grade            |             |             |             |             |                           |
| Grade 1                 | 23 (16%)    | 15 (25%)    | 9 (7%)      | 23 (35%)    | 68.75                     |
| Grade2                  | 73 (52%)    | 25 (42%)    | 34 (25%)    | 30 (45%)    | <0.0001                   |
| Grade 3                 | 46 (32%)    | 20 (33%)    | 92 (68%)    | 13 (20%)    |                           |
| Tubule formation        |             |             |             |             |                           |
| 1                       | 11 (8%)     | 5 (8%)      | 5 (4%)      | 11 (17%)    | 15.82                     |
| 2                       | 46 (32%)    | 22 (37%)    | 32 (24%)    | 18 (27%)    | 0.015                     |
| 3                       | 85 (60%)    | 33 (55%)    | 98 (72%)    | 37 (56%)    |                           |
| Pleomorphism            |             |             |             |             |                           |
| 1                       | 1 (1%)      | 3 (5%)      | 1 (1%)      | 2 (3%)      | 52.69                     |
| 2                       | 47 (33%)    | 25 (42%)    | 18 (13%)    | 38 (58%)    | <0.0001                   |
| 3                       | 94 (66%)    | 32 (53%)    | 116 (86%)   | 26 (39%)    |                           |
| Mitosis                 |             |             |             |             |                           |
| 1                       | 86 (61%)    | 36 (60%)    | 38 (28%)    | 50 (76%)    | 56.46                     |
| 2                       | 27 (19%)    | 11 (18%)    | 32 (24%)    | 8 (12%)     | <0.0001                   |
| 3                       | 29 (20%)    | 13 (22%)    | 65 (48%)    | 8 (12%)     |                           |
| Histologic types        |             |             |             |             |                           |
| No special type (NST)   | 95 (67%)    | 27 (45%)    | 109 (81%)   | 20 (30%)    | 59.07                     |
| Lobular                 | 11 (8%)     | 9 (15%)     | 8 (6%)      | 11 (17%)    | <0.0001                   |
| Other special types     | 7 (5%)      | 6 (10%)     | 2 (1%)      | 6 (9%)      |                           |
| Mixed NST               | 29 (20%)    | 18 (30%)    | 16 (12%)    | 29 (44%)    |                           |
| Lymph node status       |             |             |             |             |                           |
| Absent                  | 92 (65%)    | 34 (57%)    | 78 (58%)    | 49 (74%)    | 6.36                      |
| Present                 | 50 (35%)    | 26 (43%)    | 57 (42%)    | 17 (26%)    | 0.095                     |
| Lymphovascular invasion |             |             |             |             |                           |



|                                    |           |          |           |          |                   |
|------------------------------------|-----------|----------|-----------|----------|-------------------|
| <b>Absent</b>                      | 106 (75%) | 37 (62%) | 93 (69%)  | 57 (86%) | 11.14             |
| <b>Present</b>                     | 36 (25%)  | 23 (38%) | 42 (31%)  | 9 (14%)  | <b>0.011</b>      |
| <b>Nottingham Prognostic index</b> |           |          |           |          |                   |
| <b>Good prognostic group</b>       | 56 (40%)  | 25 (42%) | 21 (16%)  | 36 (54%) | 37.60             |
| <b>Moderate prognostic group</b>   | 70 (49%)  | 26 (43%) | 87 (64%)  | 25 (38%) | <b>&lt;0.0001</b> |
| <b>Poor prognostic group</b>       | 16 (11%)  | 9 (15%)  | 27 (20%)  | 5 (8%)   |                   |
| <b>ER status</b>                   |           |          |           |          |                   |
| <b>Negative</b>                    | 23 (16%)  | 9 (15%)  | 39 (29%)  | 5 (8%)   | 15.57             |
| <b>Positive</b>                    | 118 (84%) | 51 (85%) | 95 (71%)  | 60 (92%) | <b>0.001</b>      |
| <b>PgR status</b>                  |           |          |           |          |                   |
| <b>Negative</b>                    | 50 (36%)  | 23 (38%) | 57 (43%)  | 20 (30%) | 3.29              |
| <b>Positive</b>                    | 90 (64%)  | 37 (62%) | 76 (57%)  | 46 (70%) | 0.349             |
| <b>HER2 status</b>                 |           |          |           |          |                   |
| <b>Negative</b>                    | 125 (88%) | 53 (88%) | 113 (84%) | 61 (92%) | 2.78              |
| <b>Positive</b>                    | 17 (12%)  | 7 (12%)  | 21 (16%)  | 5 (8%)   | 0.427             |
| <b>Ki67 expression</b>             |           |          |           |          |                   |
| <b>Low≤14</b>                      | 62 (57%)  | 33 (70%) | 37 (39%)  | 42 (84%) | 30.20             |
| <b>High&gt;14</b>                  | 46 (43%)  | 14 (30%) | 57 (61%)  | 8 (16%)  | <b>&lt;0.0001</b> |
| <b>Molecular subtypes</b>          |           |          |           |          |                   |
| <b>Luminal A</b>                   | 59 (48%)  | 30 (57%) | 29 (25%)  | 41 (74%) | 46.19             |
| <b>Luminal B</b>                   | 46 (37%)  | 14 (26%) | 49 (42%)  | 9 (16%)  | <b>&lt;0.0001</b> |
| <b>Triple negative</b>             | 12 (10%)  | 7 (13%)  | 28 (24%)  | 3 (6%)   |                   |
| <b>HER2 +</b>                      | 6 (5%)    | 2 (4%)   | 10 (9%)   | 2 (4%)   |                   |
| <b>Menopausal status</b>           |           |          |           |          |                   |
| <b>Premenopausal</b>               | 46 (32%)  | 21 (35%) | 49 (36%)  | 17 (26%) | 2.36              |
| <b>Postmenopausal</b>              | 96 (68%)  | 39 (65%) | 86 (64%)  | 49 (74%) | 0.501             |
| <b>Age at diagnosis</b>            |           |          |           |          |                   |
| <b>&lt;50</b>                      | 37 (26%)  | 16 (27%) | 51 (38%)  | 13 (20%) | 8.57              |
| <b>≥50</b>                         | 105 (74%) | 44 (73%) | 84 (62%)  | 53 (80%) | <b>0.035</b>      |

**Supplementary Table S8.** Relationship between nuclear CDK2 and clinicopathological parameters in the DCIS

| Categories               | Negative /low<br>H. score ≤5 | Positive /high<br>H. score ≤5 | X <sup>2</sup><br><br><i>P</i> -value |
|--------------------------|------------------------------|-------------------------------|---------------------------------------|
| <b>Age</b>               |                              |                               | 1.4<br>0.233                          |
| <50                      | 26 (44%)                     | 33 (56%)                      |                                       |
| ≥50                      | 84 (53%)                     | 74 (47%)                      |                                       |
| <b>Tumour size</b>       |                              |                               | 3.1<br>0.07                           |
| ≤2cm                     | 51 (58%)                     | 37 (42%)                      |                                       |
| >2cm                     | 59 (46%)                     | 70 (54%)                      |                                       |
| <b>Tumour grade</b>      |                              |                               | 0.48<br>0.78                          |
| Low grade                | 16 (55%)                     | 13 (45%)                      |                                       |
| Intermediate grade       | 30 (48%)                     | 33 (52%)                      |                                       |
| High grade               | 64 (51%)                     | 61 (49%)                      |                                       |
| <b>Molecular subtype</b> |                              |                               | 5.1<br>0.16                           |
| Luminal A                | 55 (61%)                     | 35 (39%)                      |                                       |
| Luminal B                | 15 (50%)                     | 15 (50%)                      |                                       |
| HER2+                    | 11 (41%)                     | 16 (59%)                      |                                       |
| Triple Negative          | 6 (40%)                      | 9 (60%)                       |                                       |
| <b>Comedo necrosis</b>   |                              |                               | 1.3<br>0.25                           |
| Negative                 | 41 (56%)                     | 32 (44%)                      |                                       |
| Positive                 | 69 (48%)                     | 75 (52%)                      |                                       |
| <b>ER Status</b>         |                              |                               | 3.2<br>0.07                           |
| Negative                 | 19 (42%)                     | 26 (58%)                      |                                       |
| Positive                 | 80 (58%)                     | 59 (42%)                      |                                       |
| <b>PR Status</b>         |                              |                               | 6.9                                   |

|                                                                                      |          |          |                   |
|--------------------------------------------------------------------------------------|----------|----------|-------------------|
|                                                                                      |          |          | <b>0.009</b>      |
| Negative                                                                             | 30 (42%) | 42 (58%) |                   |
| Positive                                                                             | 70 (61%) | 44 (39%) |                   |
| <b>HER2 Status</b>                                                                   |          |          | 0.91              |
|                                                                                      |          |          | 0.34              |
| Negative                                                                             | 86 (56%) | 68 (44%) |                   |
| Positive                                                                             | 21 (48%) | 23 (52%) |                   |
| <b>Recurrence</b>                                                                    |          |          | 1.1               |
|                                                                                      |          |          | 0.3               |
| No recurrence                                                                        | 96 (49%) | 98 (51%) |                   |
| Recurrence                                                                           | 14 (61%) | 9 (39%)  |                   |
| <b>Ki67 expression</b>                                                               |          |          | 14.238            |
|                                                                                      |          |          | <b>&lt;0.0001</b> |
| Low ( $\leq 14$ )                                                                    | 85 (63%) | 49 (37%) |                   |
| High ( $> 14$ )                                                                      | 14 (31%) | 31 (69%) |                   |
| HER2, human epidermal growth factor receptor 2      Significant P values are in bold |          |          |                   |

**Supplementary Table S9.** Relationship between cytoplasmic CDK2 and clinicopathological parameters in the DCIS

| Categories               | Negative /low<br>H. score ≤20 | Positive /high<br>H. score ≤20 | X <sup>2</sup><br><br><i>P</i> -value |
|--------------------------|-------------------------------|--------------------------------|---------------------------------------|
| <b>Age</b>               |                               |                                | 0.4<br>0.52                           |
| <50                      | 32 (54%)                      | 27 (46%)                       |                                       |
| ≥50                      | 77 (49%)                      | 79 (51%)                       |                                       |
| <b>Tumour size</b>       |                               |                                | 0.09<br>0.75                          |
| ≤2cm                     | 43 (49%)                      | 44 (51%)                       |                                       |
| >2cm                     | 66 (52%)                      | 62 (48%)                       |                                       |
| <b>Tumour grade</b>      |                               |                                | 16.4<br><b>&lt;0.0001</b>             |
| Low grade                | 7 (24%)                       | 22 (76%)                       |                                       |
| Intermediate grade       | 25 (41%)                      | 36 (59%)                       |                                       |
| High grade               | 77 (62%)                      | 48 (38%)                       |                                       |
| <b>Molecular subtype</b> |                               |                                | 9.9<br><b>0.01</b>                    |
| Luminal A                | 35 (40%)                      | 53 (60%)                       |                                       |
| Luminal B                | 18 (60%)                      | 12 (40%)                       |                                       |
| HER2+                    | 19 (70%)                      | 8 (30%)                        |                                       |
| Triple Negative          | 9 (60%)                       | 6 (40%)                        |                                       |
| <b>Comedo necrosis</b>   |                               |                                | 9.2<br><b>0.002</b>                   |
| Negative                 | 26 (36%)                      | 46 (64%)                       |                                       |

|                        |           |          |              |
|------------------------|-----------|----------|--------------|
| Positive               | 83 (58%)  | 60 (42%) |              |
| <b>ER Status</b>       |           |          | 6.6<br>0.01  |
| Negative               | 30 (67%)  | 15 (33%) |              |
| Positive               | 61 (44%)  | 76 (56%) |              |
| <b>PR Status</b>       |           |          | 9.9<br>0.002 |
| Negative               | 46 (64%)  | 26 (36%) |              |
| Positive               | 45 (40%)  | 67 (60%) |              |
| <b>HER2 Status</b>     |           |          | 3.3<br>0.07  |
| Negative               | 105 (65%) | 56 (35%) |              |
| Positive               | 35 (79%)  | 9 (21%)  |              |
| <b>Recurrence</b>      |           |          | 1.1<br>0.29  |
| No recurrence          | 136 (68%) | 65 (32%) |              |
| Recurrence             | 18 (78%)  | 5 (22%)  |              |
| <b>Ki67 expression</b> |           |          | 3.4<br>0.06  |
| Low ( $\leq 14$ )      | 61 (46%)  | 71 (54%) |              |
| High ( $> 14$ )        | 28 (62%)  | 17 (38%) |              |

**Supplementary Table S10.** Relationship between nuclear(N)/ cytoplasmic (C) CDK2 co-expression and clinicopathological parameters in the DCIS cohort

| Categories                      | Negative<br>N -<br>negative C<br>CDK2 | Positive N -<br>negative C<br>CDK2 | Positive N -<br>positive C<br>CDK2 | Positive C -<br>negative N<br>CDK2 | X <sup>2</sup><br><br>P-value |
|---------------------------------|---------------------------------------|------------------------------------|------------------------------------|------------------------------------|-------------------------------|
| <b>Age</b>                      |                                       |                                    |                                    |                                    |                               |
| <50                             | 20 (34%)                              | 15 (25%)                           | 11 (19%)                           | 13 (22%)                           | 1.4                           |
| ≥50                             | 47 (30%)                              | 35 (23%)                           | 27 (17%)                           | 47 (30%)                           | 0.71                          |
| <b>Tumour size</b>              |                                       |                                    |                                    |                                    | 3.56<br><b>0.3</b>            |
| ≤2cm                            | 30 (34%)                              | 16 (18%)                           | 13 (15%)                           | 28 (33%)                           |                               |
| >2cm                            | 37 (28%)                              | 34 (27%)                           | 25 (20%)                           | 32 (25%)                           |                               |
| <b>Tumour grade</b>             |                                       |                                    |                                    |                                    | 12.9<br><b>0.043</b>          |
| Low grade                       | 6 (20%)                               | 4 (14%)                            | 8 (28%)                            | 11 (38%)                           |                               |
| Intermediate grade              | 16 (26%)                              | 11 (18%)                           | 15 (25%)                           | 19 (31%)                           |                               |
| High grade                      | 45 (36%)                              | 35 (28%)                           | 15 (12%)                           | 30 (24%)                           |                               |
| <b>Molecular subtype</b>        |                                       |                                    |                                    |                                    | 19.87<br><b>0.01</b>          |
| Luminal A                       | 27 (31%)                              | 12 (14%)                           | 14 (15%)                           | 35 (40%)                           |                               |
| Luminal B                       | 11 (37%)                              | 7 (23%)                            | 7 (23%)                            | 5 (17%)                            |                               |
| HER2+                           | 7 (26%)                               | 12 (44%)                           | 3 (11%)                            | 5 (19%)                            |                               |
| Triple Negative                 | 5 (34%)                               | 6 (40%)                            | 2 (13%)                            | 2 (13%)                            |                               |
| <b>Comedo type<br/>necrosis</b> |                                       |                                    |                                    |                                    | 9.4<br><b>0.024</b>           |
| Negative                        | 21 (29%)                              | 9 (13%)                            | 16 (22%)                           | 26 (36%)                           |                               |
| Positive                        | 46 (32%)                              | 41 (29%)                           | 22 (15%)                           | 34 (24%)                           |                               |
| <b>ER Status</b>                |                                       |                                    |                                    |                                    | 13.5                          |

|                        |          |           |          |          |                   |
|------------------------|----------|-----------|----------|----------|-------------------|
|                        |          |           |          |          | <b>0.004</b>      |
| Negative               | 14 (31%) | 18 (40%)  | 5 (11%)  | 8 (18%)  |                   |
| Positive               | 45 (33%) | 21 (15%)  | 26 (19%) | 45 (33%) |                   |
| <b>PR Status</b>       |          |           |          |          | 14.2              |
|                        |          |           |          |          | <b>0.003</b>      |
| Negative               | 25 (34%) | 23 (32%)  | 12 (17%) | 12 (17%) |                   |
| Positive               | 33 (29%) | 16 (14%)  | 19 (17%) | 44 (40%) |                   |
| <b>HER2 Status</b>     |          |           |          |          | 4.930             |
|                        |          |           |          |          | 0.177             |
| Negative               | 91 (35%) | 129 (50%) | 31 (12%) | 9 (3%)   |                   |
| Positive               | 41 (48%) | 35 (41%)  | 7 (8%)   | 2 (3%)   |                   |
| <b>Recurrence</b>      |          |           |          |          | 1.07              |
|                        |          |           |          |          | 0.62              |
| No recurrence          | 58 (30%) | 47 (24%)  | 34 (18%) | 53 (28%) |                   |
| Recurrence             | 9 (39%)  | 3 (13%)   | 4 (18%)  | 7 (30%)  |                   |
| <b>Ki67 expression</b> |          |           |          |          | 18.3              |
|                        |          |           |          |          | <b>&lt;0.0001</b> |
| Low                    | 45 (34%) | 20 (15%)  | 18 (14%) | 49 (37%) |                   |
| High                   | 11 (24%) | 18 (40%)  | 10 (22%) | 6 (14%)  |                   |

HER2, human epidermal growth factor receptor 2      Significant P values are in bold.

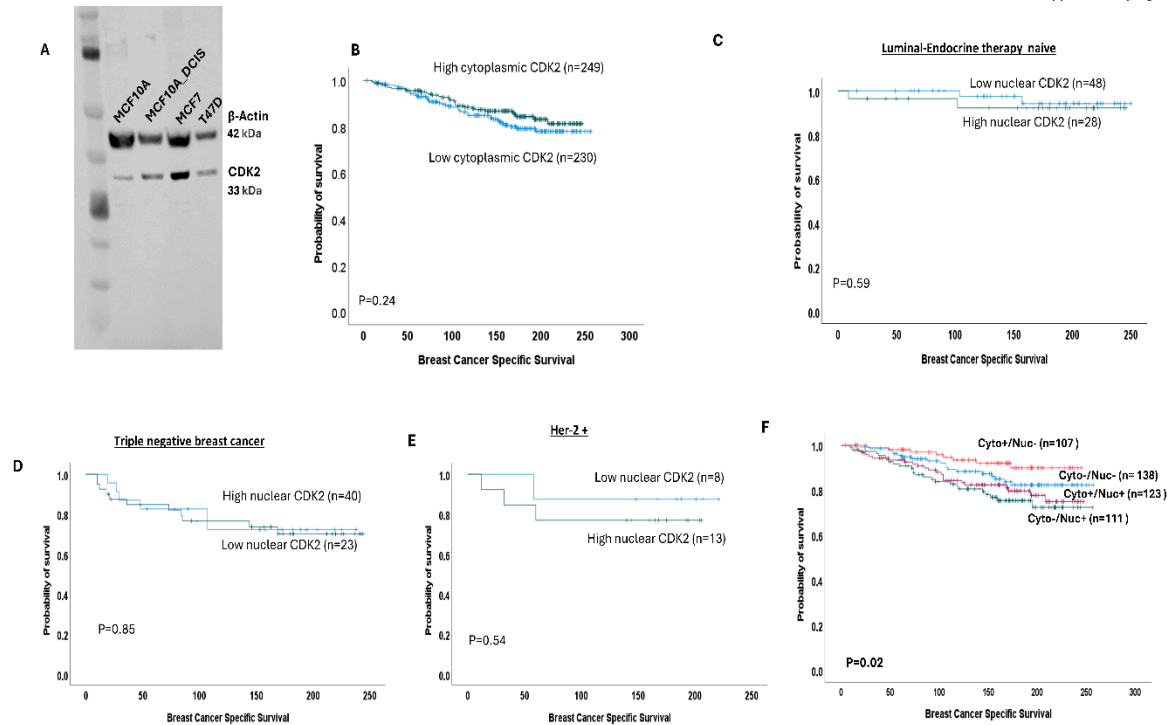

**Supplementary Figure S1: CDK2 expression in BC.** (A) Western blot of CDK2 antibody shows specific bands at 33 KDa. (B) Kaplan-Meier curve for CDK2 cytoplasmic expression and BCSS in the whole cohort. (C) Kaplan-Meier curve for CDK2 nuclear expression and BCSS in the endocrine therapy naive patients. (D) Kaplan-Meier curve for CDK2 nuclear expression and BCSS in triple negative BC. (E) Kaplan-Meier curve for CDK2 nuclear expression and BCSS in HER2 enriched BC. (F) Kaplan-Meier curve for CDK2 nuclear/ cytoplasmic co-expression and BCSS in the whole cohort.



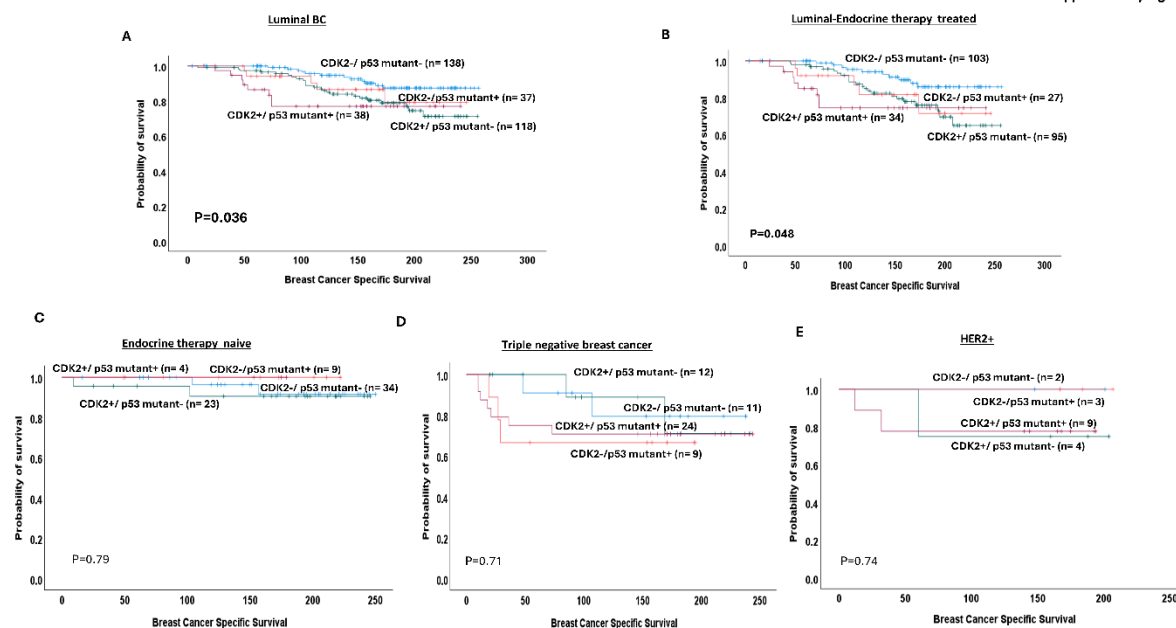

**Supplementary figure S2: CDK2/p53 co-expression in BC** (A) Kaplan-Meier curve for CDK2/p53 co-expression and BCSS in luminal BC. (B) Kaplan-Meier curve for CDK2/p53 co-expression and BCSS in the endocrine therapy treated patients. (C) Kaplan-Meier curve for CDK2/p53 co-expression and BCSS in the endocrine therapy naïve patients. (D) Kaplan-Meier curve for CDK2/p53 co-expression and BCSS in triple negative BC. (E) Kaplan-Meier curve for CDK2/p53 co-expression and BCSS in HER2 enriched BC.

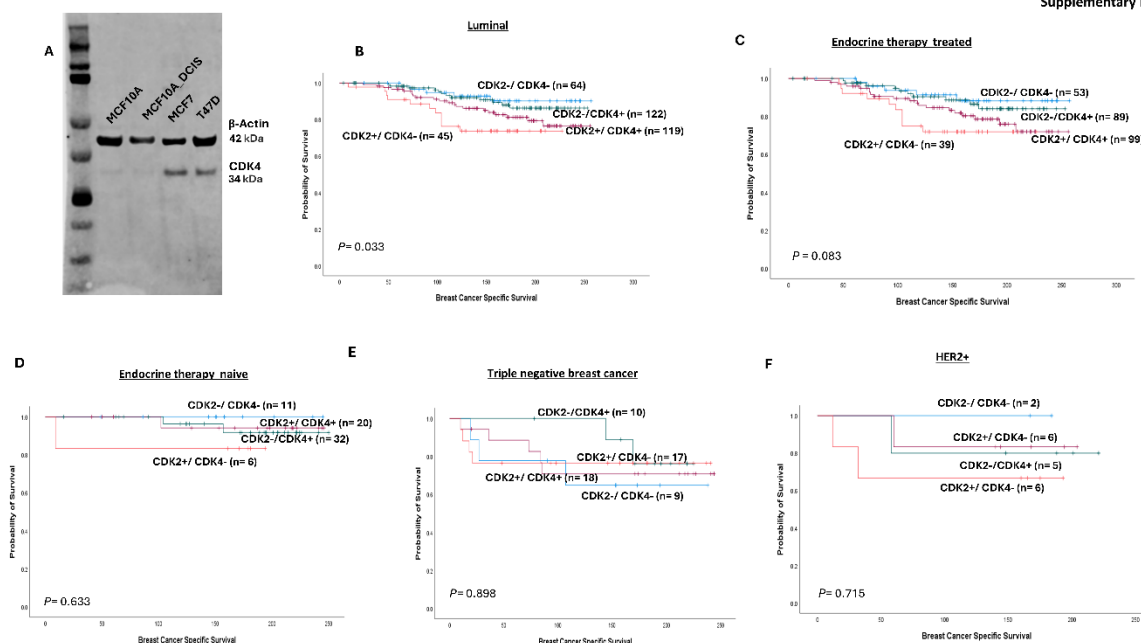

**Supplementary figure S3: CDK2/CDK4 co-expression in BC.** (A) Western blot of CDK4 antibody shows specific bands at 34 KDa. (B) Kaplan-Meier curve for CDK2/CDK4 co-expression and BCSS in the luminal BC. (C) Kaplan-Meier curve for CDK2/CDK4 co-expression and BCSS in the endocrine therapy treated patients. (D) Kaplan-Meier curve for CDK2/CDK4 co-expression and BCSS in the endocrine therapy naïve patients. (E) Kaplan-Meier curve for CDK2/CDK4 co-expression and BCSS in triple negative BC. (F) Kaplan-Meier curve for CDK2/CDK4 co-expression and BCSS in the HER2 enriched BC.

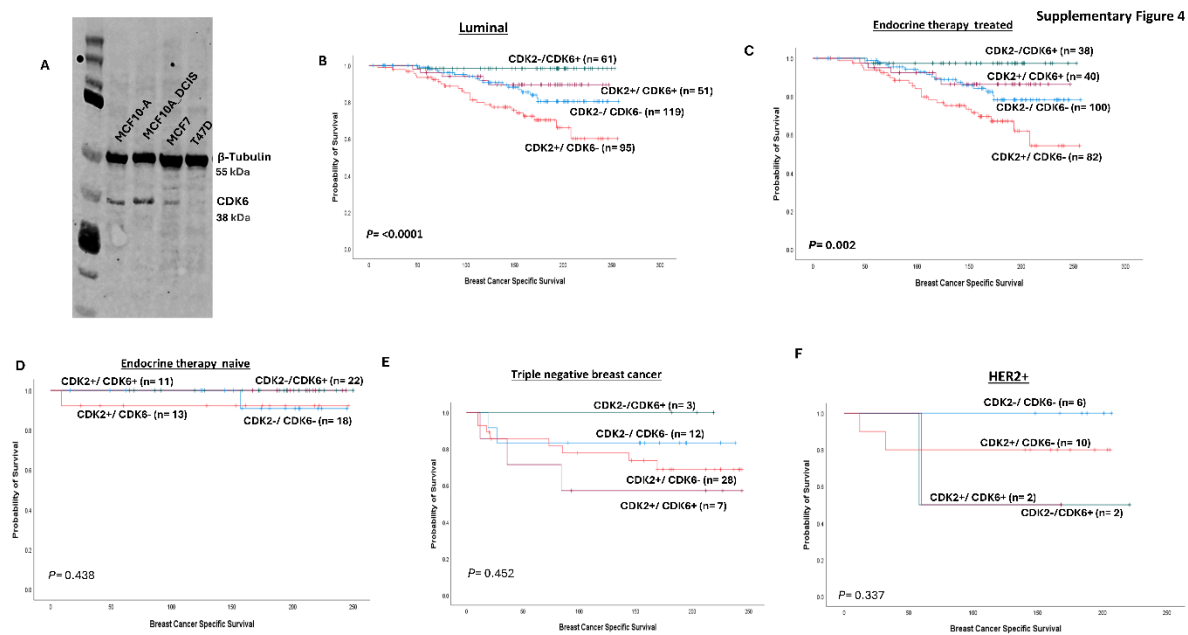

**Supplementary figure S4: CDK2/CDK4 co-expression in BC.** (A) Western blot of CDK6 antibody shows specific bands at 38 KDa. (B) Kaplan-Meier curve for CDK2/CDK6 co-expression and BCSS in luminal BC. (C) Kaplan-Meier curve for CDK2/CDK6 co-expression and BCSS in the endocrine therapy treated patients. (D) Kaplan-Meier curve for CDK2/CDK6 co-expression and BCSS in the endocrine therapy naïve patients. (E) Kaplan-Meier curve for CDK2/CDK6 co-expression and BCSS in triple negative BC. (F) Kaplan-Meier curve for CDK2/CDK6 co-expression and BCSS in HER2 enriched BC.

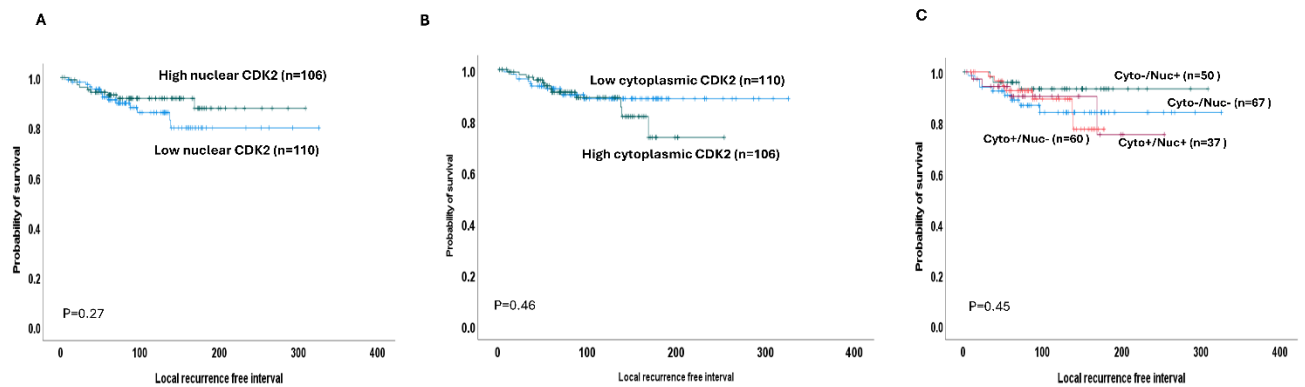

**Supplementary figure S5: CDK2 expression in DCIS.** (A) Kaplan-Meier curve for nuclear CDK2 expression in DCIS. (B) Kaplan-Meier curve for cytoplasmic CDK2 expression in DCIS. (C) Kaplan-Meier curve for CDK2 nuclear/cytoplasmic co-expression in DCIS.
