# Supplementary material for: Clinicopathological Significance of Cyclin-Dependent Kinase 2 (CDK2) in Ductal Carcinoma In Situ and Early-Stage Invasive Breast Cancers
Source: Int J Mol Sci. 2024 May 6;25(9):5053. doi: 10.3390/ijms25095053 (PMC11084890; doi:10.3390/ijms25095053)
Supplement: Supplementary file 1 [file ijms-25-05053-s001.zip › Supplementary File 1.xlsx]

## Sheet: Q1_v_Q4_diffexpr-results
Gene expressed lower in Q1 (higher in Q4; sorted by padj = FDR corrected p value)										Genes expressed higher in Q1 (lower in Q4; sorted by padj = FDR corrected p value)
	baseMean	log2FoldChange	lfcSE	stat	pvalue	padj	Ensembl ID	Gene symbol			baseMean	log2FoldChange	lfcSE	stat	pvalue	padj	Ensembl ID	Gene symbol
ENSG00000123374	2378.35	-1.20763	0.0314207	-38.4342	0	0	ENSG00000123374	CDK2		ENSG00000202198	10507.6	7.31328	0.194779	37.5465	0	0	ENSG00000202198	RF00100
ENSG00000111602	3144.02	-1.21289	0.0488583	-24.8247	4.85828e-136	1.49495e-132	ENSG00000111602	TIMELESS		ENSG00000200087	337.088	5.7145	0.175894	32.4883	1.56119e-231	2.56211e-227	ENSG00000200087	SNORA73B
ENSG00000161800	2943.43	-1.37737	0.0604907	-22.7699	9.10954e-115	2.36052e-111	ENSG00000161800	RACGAP1		ENSG00000252010	116.571	6.80815	0.217533	31.2971	5.10332e-215	6.28142e-211	ENSG00000252010	SCARNA5
ENSG00000166881	2126.42	-1.05976	0.0480275	-22.0658	6.74273e-108	1.58082e-104	ENSG00000166881	NEMP1		ENSG00000238741	69.4455	6.19091	0.20205	30.6405	3.53766e-206	3.48346e-202	ENSG00000238741	SCARNA7
ENSG00000120802	6667.63	-1.03069	0.0498021	-20.6957	3.78434e-95	6.01026e-92	ENSG00000120802	TMPO		ENSG00000202538	291.189	6.27465	0.212148	29.5768	2.96861e-192	2.43594e-188	ENSG00000202538	RNU4-2
ENSG00000165244	675.126	-1.39685	0.0676965	-20.634	1.36017e-94	2.09271e-91	ENSG00000165244	ZNF367		ENSG00000239002	103.061	6.52958	0.2233	29.2413	5.7995e-188	4.07904e-184	ENSG00000239002	SCARNA10
ENSG00000114346	3573.89	-1.30067	0.0633708	-20.5248	1.29329e-93	1.87275e-90	ENSG00000114346	ECT2		ENSG00000252481	92.5513	4.13589	0.147659	28.0097	1.23686e-172	7.61197e-169	ENSG00000252481	SCARNA13
ENSG00000137310	2048.73	-1.33528	0.0677093	-19.7208	1.4296e-86	1.63686e-83	ENSG00000137310	TCF19		ENSG00000252835	35.5117	5.64497	0.204412	27.6157	7.21181e-168	3.94518e-164	ENSG00000252835	SCARNA21
ENSG00000198554	1046.59	-1.11366	0.0568095	-19.6034	1.44567e-85	1.58169e-82	ENSG00000198554	WDHD1		ENSG00000212402	35.0862	6.48164	0.245981	26.3502	5.11184e-153	2.51676e-149	ENSG00000212402	SNORA74B
ENSG00000113368	3830.39	-1.33231	0.0682834	-19.5115	8.7591e-85	8.98428e-82	ENSG00000113368	LMNB1		ENSG00000201998	38.5998	5.86924	0.224988	26.0869	5.13787e-150	2.29962e-146	ENSG00000201998	SNORA23
ENSG00000076003	4144.49	-1.08793	0.0560769	-19.4007	7.61014e-84	7.34662e-81	ENSG00000076003	MCM6		ENSG00000212464	24.7472	5.28617	0.20397	25.9164	4.35016e-148	1.7848e-144	ENSG00000212464	SNORA12
ENSG00000175305	540.4	-1.65524	0.0861426	-19.2151	2.7675e-82	2.43313e-79	ENSG00000175305	CCNE2		ENSG00000212232	119.9	4.45647	0.17368	25.6591	3.34562e-145	1.26706e-141	ENSG00000212232	SNORD17
ENSG00000135476	1161.8	-1.51841	0.0797391	-19.0422	7.61918e-81	6.25205e-78	ENSG00000135476	ESPL1		ENSG00000212443	35.3322	4.4817	0.177089	25.3076	2.63476e-141	9.26569e-138	ENSG00000212443	SNORA53
ENSG00000162607	4398.05	-1.07545	0.0568976	-18.9016	1.10732e-79	8.65364e-77	ENSG00000162607	USP1		ENSG00000200795	51.243	5.40748	0.216329	24.9965	6.66549e-138	2.18779e-134	ENSG00000200795	RNU4-1
ENSG00000165891	346.3	-1.77787	0.0941728	-18.8788	1.70514e-79	1.31173e-76	ENSG00000165891	E2F7		ENSG00000207445	27.1207	4.47284	0.181117	24.6959	1.18267e-134	3.42515e-131	ENSG00000207445	SNORD15B
ENSG00000138160	2440.81	-1.34365	0.0711971	-18.8722	1.92993e-79	1.46182e-76	ENSG00000138160	KIF11		ENSG00000251791	32.6657	4.01417	0.166954	24.0435	9.75229e-128	2.66747e-124	ENSG00000251791	SCARNA6
ENSG00000092470	920.308	-1.08002	0.057311	-18.8449	3.23748e-79	2.37902e-76	ENSG00000092470	WDR76		ENSG00000236581	19.7647	3.40045	0.15355	22.1455	1.1524e-108	2.83687e-105	ENSG00000236581	STARD13-AS
ENSG00000073111	4150.26	-1.28994	0.0688184	-18.7441	2.16219e-78	1.5428e-75	ENSG00000073111	MCM2		ENSG00000249669	240.069	3.17587	0.144816	21.9305	1.33097e-106	2.97858e-103	ENSG00000249669	CARMN
ENSG00000112029	734.804	-1.20359	0.0653962	-18.4046	1.20764e-75	7.07822e-73	ENSG00000112029	FBXO5		ENSG00000274012	3416.22	3.35596	0.153171	21.9099	2.08899e-106	4.47172e-103	ENSG00000274012	RN7SL2
ENSG00000169607	762.205	-1.53182	0.083629	-18.3168	6.0748e-75	3.39871e-72	ENSG00000169607	CKAP2L		ENSG00000201098	16.9487	6.28006	0.290814	21.5948	2.01057e-103	4.12452e-100	ENSG00000201098	RNY1
ENSG00000140525	2937.99	-1.1886	0.0650844	-18.2625	1.64556e-74	8.80623e-72	ENSG00000140525	FANCI		ENSG00000266019	26.0115	6.91676	0.322713	21.4331	6.56072e-102	1.29204e-98	ENSG00000266019	MIR3609
ENSG00000124795	8557.7	-1.14342	0.0632254	-18.0847	4.20306e-73	2.11156e-70	ENSG00000124795	DEK		ENSG00000267322	49.4693	2.47907	0.117011	21.1867	1.26653e-99	2.39832e-96	ENSG00000267322	SNHG22
ENSG00000111247	775.357	-1.48108	0.0819646	-18.0698	5.51238e-73	2.68709e-70	ENSG00000111247	RAD51AP1		ENSG00000248483	12.7929	3.81801	0.180951	21.0996	8.01602e-99	1.46171e-95	ENSG00000248483	POU5F2
ENSG00000101003	1201.37	-1.31481	0.0730646	-17.9952	2.1249e-72	9.96355e-70	ENSG00000101003	GINS1		ENSG00000279802	10.3258	4.31503	0.204564	21.0937	9.08032e-99	1.59664e-95	ENSG00000279802
ENSG00000163808	764.173	-1.45865	0.0816933	-17.8552	2.63434e-71	1.13416e-68	ENSG00000163808	KIF15		ENSG00000242100	11.6694	2.75667	0.132813	20.756	1.08196e-95	1.77564e-92	ENSG00000242100	RPL9P32
ENSG00000142731	713.476	-1.22927	0.0688477	-17.8549	2.64916e-71	1.13416e-68	ENSG00000142731	PLK4		ENSG00000200959	24.7445	6.37576	0.309964	20.5693	5.16835e-94	7.71087e-91	ENSG00000200959	SNORA74A
ENSG00000163535	842.163	-1.07969	0.0606787	-17.7936	7.925e-71	3.22462e-68	ENSG00000163535	SGO2		ENSG00000227170	17.8817	3.69014	0.183093	20.1544	2.46063e-90	3.46133e-87	ENSG00000227170	AF178030.1
ENSG00000092853	507.816	-1.64567	0.0928248	-17.7288	2.5124e-70	9.7398e-68	ENSG00000092853	CLSPN		ENSG00000181541	10.81	4.0399	0.200529	20.1462	2.90468e-90	3.97247e-87	ENSG00000181541	MAB21L2
ENSG00000265415	136.85	-1.87861	0.106275	-17.6769	6.32201e-70	2.41285e-67	ENSG00000265415	AC099850.3		ENSG00000234040	6.87172	3.10711	0.154281	20.1393	3.34029e-90	4.44475e-87	ENSG00000234040	RPL10P12
ENSG00000121621	544.999	-1.44128	0.0824359	-17.4837	1.90785e-68	6.75762e-66	ENSG00000121621	KIF18A		ENSG00000273319	20.0068	3.2352	0.160986	20.0962	7.97047e-90	1.03268e-86	ENSG00000273319	AC058791.1
ENSG00000123473	1111.37	-1.32887	0.0761021	-17.4617	2.80623e-68	9.79872e-66	ENSG00000123473	STIL		ENSG00000238795	22.1124	3.28741	0.163617	20.0921	8.64698e-90	1.0916e-86	ENSG00000238795	SCARNA12
ENSG00000171320	470.529	-1.42442	0.0819624	-17.379	1.19001e-67	4.09713e-65	ENSG00000171320	ESCO2		ENSG00000226367	8.52108	4.73846	0.238431	19.8735	6.89824e-88	8.4907e-85	ENSG00000226367	ST7-AS2
ENSG00000137807	1742.98	-1.31203	0.0756304	-17.348	2.04275e-67	6.88855e-65	ENSG00000137807	KIF23		ENSG00000218596	5.57006	4.70225	0.237277	19.8175	2.10267e-87	2.52494e-84	ENSG00000218596	AL162578.1
ENSG00000130287	52.3623	-4.58702	0.266169	-17.2335	1.48921e-66	4.92078e-64	ENSG00000130287	NCAN		ENSG00000259001	14.4851	5.23206	0.264578	19.7752	4.87265e-87	5.71191e-84	ENSG00000259001	AL355075.4
ENSG00000185480	456.613	-1.12486	0.0663411	-16.9557	1.74689e-64	5.11943e-62	ENSG00000185480	PARPBP		ENSG00000213891	9.97372	2.70092	0.138055	19.5642	3.12513e-85	3.34483e-82	ENSG00000213891	RPL3P6
ENSG00000145386	1520.65	-1.47462	0.0872161	-16.9077	3.94867e-64	1.11729e-61	ENSG00000145386	CCNA2		ENSG00000242094	13.7508	3.29394	0.169907	19.3867	9.98852e-84	9.45721e-81	ENSG00000242094	FOXP1-IT1
ENSG00000164109	1526.9	-1.27354	0.0756084	-16.8439	1.16369e-63	3.21872e-61	ENSG00000164109	MAD2L1		ENSG00000232928	10.3005	3.02371	0.156134	19.3662	1.48921e-83	1.38339e-80	ENSG00000232928	DDX3P1
ENSG00000261409	38.6722	-4.45151	0.265867	-16.7433	6.334e-63	1.66764e-60	ENSG00000261409	AL035425.3		ENSG00000280258	6.81382	4.27306	0.221216	19.3163	3.9198e-83	3.57384e-80	ENSG00000280258
ENSG00000090889	1714.41	-1.43818	0.0859543	-16.7319	7.67648e-63	2.01034e-60	ENSG00000090889	KIF4A		ENSG00000207088	7.35911	3.78543	0.196773	19.2375	1.79605e-82	1.60776e-79	ENSG00000207088	SNORA7B
ENSG00000138182	1216.52	-1.01679	0.0609028	-16.6952	1.4195e-62	3.65904e-60	ENSG00000138182	KIF20B		ENSG00000223650	7.93165	4.62728	0.241212	19.1835	5.08704e-82	4.39395e-79	ENSG00000223650	UHRF2P1
ENSG00000146918	2199.24	-1.01454	0.0608648	-16.6688	2.20966e-62	5.63681e-60	ENSG00000146918	NCAPG2		ENSG00000203804	33.97	2.18523	0.114495	19.0858	3.31421e-81	2.81331e-78	ENSG00000203804	ADAMTSL4-AS1
ENSG00000156802	5396.34	-1.30264	0.0784276	-16.6094	5.95889e-62	1.44214e-59	ENSG00000156802	ATAD2		ENSG00000203506	5.17176	4.05052	0.212699	19.0434	7.44684e-81	6.2142e-78	ENSG00000203506	RBMS3-AS2
ENSG00000102384	389.763	-1.3263	0.0801168	-16.5545	1.48463e-61	3.49733e-59	ENSG00000102384	CENPI		ENSG00000206585	12.5103	4.68841	0.247764	18.9229	7.38817e-80	5.9631e-77	ENSG00000206585	RNVU1-7
ENSG00000088325	4896.96	-1.4698	0.0893056	-16.4581	7.33107e-61	1.61133e-58	ENSG00000088325	TPX2		ENSG00000279544	9.2209	3.07493	0.162642	18.9061	1.01609e-79	8.06875e-77	ENSG00000279544	AL133243.4
ENSG00000121152	993.5	-1.36476	0.0834239	-16.3594	3.72971e-60	7.86897e-58	ENSG00000121152	NCAPH		ENSG00000102466	211.016	2.46683	0.130991	18.8321	4.11929e-79	2.98249e-76	ENSG00000102466	FGF14
ENSG00000174371	903.579	-1.53243	0.0940105	-16.3007	9.75981e-60	2.01052e-57	ENSG00000174371	EXO1		ENSG00000207175	6.04838	3.6467	0.194707	18.7292	2.86303e-78	2.01369e-75	ENSG00000207175	RNU1-67P
ENSG00000113810	3989.33	-1.1878	0.073092	-16.2508	2.20486e-59	4.43078e-57	ENSG00000113810	SMC4		ENSG00000206634	8.91362	3.02935	0.162006	18.6991	5.0376e-78	3.49325e-75	ENSG00000206634	SNORA22
ENSG00000198901	3453.39	-1.28994	0.0795816	-16.2091	4.35044e-59	8.51965e-57	ENSG00000198901	PRC1		ENSG00000265142	9.91851	3.39939	0.18222	18.6554	1.14049e-77	7.79877e-75	ENSG00000265142	MIR133A1HG
ENSG00000163507	722.94	-1.27998	0.0789876	-16.2048	4.66645e-59	9.00973e-57	ENSG00000163507	CIP2A		ENSG00000175426	572.412	3.76069	0.20196	18.621	2.17076e-77	1.46404e-74	ENSG00000175426	PCSK1
ENSG00000109805	1190.26	-1.39603	0.0863977	-16.1582	9.94607e-59	1.89068e-56	ENSG00000109805	NCAPG		ENSG00000259453	5.31272	3.70493	0.198973	18.6202	2.20347e-77	1.46602e-74	ENSG00000259453	AC087286.4
ENSG00000176890	1696.66	-1.29245	0.0801733	-16.1206	1.82688e-58	3.35614e-56	ENSG00000176890	TYMS		ENSG00000279078	9.58297	3.3359	0.179221	18.6133	2.50843e-77	1.64667e-74	ENSG00000279078	SND1-IT1
ENSG00000156970	1254.49	-1.31194	0.0814361	-16.11	2.17027e-58	3.94285e-56	ENSG00000156970	BUB1B		ENSG00000232912	12.167	2.41272	0.130023	18.5561	7.28297e-77	4.71802e-74	ENSG00000232912	AL096855.1
ENSG00000111206	2893.71	-1.61867	0.100493	-16.1073	2.2688e-58	4.08738e-56	ENSG00000111206	FOXM1		ENSG00000208772	24.7514	2.22385	0.120023	18.5286	1.21486e-76	7.76782e-74	ENSG00000208772	SNORD94
ENSG00000101447	1195.81	-1.63562	0.101675	-16.0867	3.16286e-58	5.64203e-56	ENSG00000101447	FAM83D		ENSG00000233559	38.7605	3.30083	0.178468	18.4953	2.25288e-76	1.42203e-73	ENSG00000233559	LINC00513
ENSG00000169679	1689.54	-1.41003	0.0878169	-16.0564	5.15222e-58	9.05945e-56	ENSG00000169679	BUB1		ENSG00000223522	17.809	2.2235	0.120511	18.4506	5.15604e-76	3.21332e-73	ENSG00000223522	AC093690.1
ENSG00000137804	2796.59	-1.22661	0.0764467	-16.0453	6.16153e-58	1.07193e-55	ENSG00000137804	NUSAP1		ENSG00000235066	6.42018	3.6552	0.198163	18.4454	5.67348e-76	3.4916e-73	ENSG00000235066	AC009303.2
ENSG00000131747	10212.3	-1.60542	0.100085	-16.0405	6.65709e-58	1.15407e-55	ENSG00000131747	TOP2A		ENSG00000258274	7.50851	3.30522	0.179228	18.4414	6.11349e-76	3.71594e-73	ENSG00000258274	AC012085.2
ENSG00000198826	1355.17	-1.26978	0.0791844	-16.0357	7.19105e-58	1.24226e-55	ENSG00000198826	ARHGAP11A		ENSG00000207008	6.0148	4.0816	0.221576	18.4208	8.9495e-76	5.37341e-73	ENSG00000207008	SNORA54
ENSG00000123219	347.513	-1.1131	0.0698464	-15.9365	3.53873e-57	5.92605e-55	ENSG00000123219	CENPK		ENSG00000273768	6.24872	4.88479	0.265461	18.4011	1.28618e-75	7.44985e-73	ENSG00000273768	RF00003
ENSG00000010292	6281.33	-1.05518	0.0662881	-15.9181	4.74343e-57	7.73305e-55	ENSG00000010292	NCAPD2		ENSG00000232712	12.4987	2.45875	0.133642	18.398	1.36344e-75	7.80556e-73	ENSG00000232712	KIZ-AS1
ENSG00000122966	1453.5	-1.09049	0.0686323	-15.8889	7.56616e-57	1.21736e-54	ENSG00000122966	CIT		ENSG00000225092	8.99587	3.14128	0.171085	18.361	2.69767e-75	1.52663e-72	ENSG00000225092	AL355336.1
ENSG00000104738	8984.53	-1.15789	0.0728799	-15.8876	7.7207e-57	1.23818e-54	ENSG00000104738	MCM4		ENSG00000279166	7.05499	3.7827	0.206545	18.3142	6.38099e-75	3.5299e-72	ENSG00000279166	AC009951.1
ENSG00000138778	1259.85	-1.35026	0.0850466	-15.8767	9.18376e-57	1.46803e-54	ENSG00000138778	CENPE		ENSG00000251354	5.40655	4.05539	0.221868	18.2784	1.23012e-74	6.7293e-72	ENSG00000251354	AC024451.1
ENSG00000117650	1616.15	-1.34991	0.0850535	-15.8713	1.00212e-56	1.59672e-54	ENSG00000117650	NEK2		ENSG00000249035	11.8162	2.60362	0.142566	18.2626	1.64392e-74	8.80623e-72	ENSG00000249035	CLMAT3
ENSG00000085999	460.362	-1.41089	0.0889911	-15.8543	1.31351e-56	2.07274e-54	ENSG00000085999	RAD54L		ENSG00000171189	68.9243	3.06096	0.168106	18.2085	4.42028e-74	2.31519e-71	ENSG00000171189	GRIK1
ENSG00000129173	408.523	-1.60047	0.101112	-15.8287	1.97357e-56	3.09448e-54	ENSG00000129173	E2F8		ENSG00000239899	13.4317	3.25838	0.179355	18.1672	9.38475e-74	4.81301e-71	ENSG00000239899	RN7SL674P
ENSG00000139354	573.895	-1.14911	0.0726402	-15.8191	2.29582e-56	3.56569e-54	ENSG00000139354	GAS2L3		ENSG00000223984	6.47953	3.47191	0.191687	18.1124	2.54482e-73	1.29167e-70	ENSG00000223984	HNRNPRP1
ENSG00000136492	743.188	-1.39979	0.0887039	-15.7805	4.24128e-56	6.40537e-54	ENSG00000136492	BRIP1		ENSG00000280375	6.63689	3.66942	0.203051	18.0715	5.34869e-73	2.63338e-70	ENSG00000280375	AL359740.1
ENSG00000068489	1193.58	-1.59915	0.101363	-15.7765	4.51231e-56	6.79386e-54	ENSG00000068489	PRR11		ENSG00000222489	7.51249	3.58908	0.198875	18.0469	8.34912e-73	4.03001e-70	ENSG00000222489	SNORA79B
ENSG00000118193	779.537	-1.58355	0.100395	-15.7732	4.75602e-56	7.13896e-54	ENSG00000118193	KIF14		ENSG00000231865	11.3101	3.05005	0.169267	18.0192	1.37709e-72	6.5825e-70	ENSG00000231865
ENSG00000072571	945.448	-1.27153	0.0808396	-15.729	9.5678e-56	1.40197e-53	ENSG00000072571	HMMR		ENSG00000279384	28.3196	2.56585	0.142469	18.0099	1.62893e-72	7.71141e-70	ENSG00000279384	AC080188.2
ENSG00000256663	55.6954	-1.53825	0.0978916	-15.7138	1.21615e-55	1.76625e-53	ENSG00000256663	AC112777.1		ENSG00000197061	15.6137	2.95083	0.16411	17.9809	2.7516e-72	1.27804e-69	ENSG00000197061	HIST1H4C
ENSG00000112742	1013.75	-1.48041	0.0945042	-15.665	2.6236e-55	3.7659e-53	ENSG00000112742	TTK		ENSG00000223528	7.76196	3.01322	0.167615	17.977	2.94944e-72	1.34456e-69	ENSG00000223528	AL359094.1
ENSG00000117724	7182.97	-1.37182	0.0879955	-15.5897	8.55374e-55	1.18296e-52	ENSG00000117724	CENPF		ENSG00000200156	12.4515	6.51225	0.362483	17.9657	3.61809e-72	1.63425e-69	ENSG00000200156	RNU5B-1
ENSG00000148773	6448.33	-1.40717	0.09071	-15.5129	2.83948e-54	3.79888e-52	ENSG00000148773	MKI67		ENSG00000188365	12.7041	2.08487	0.116381	17.9142	9.13235e-72	4.08747e-69	ENSG00000188365	AC092171.1
ENSG00000035499	396.122	-1.34845	0.0874706	-15.416	1.27713e-53	1.64603e-51	ENSG00000035499	DEPDC1B		ENSG00000219547	4.05055	3.99708	0.223242	17.9047	1.0837e-71	4.80677e-69	ENSG00000219547	RPL17P25
ENSG00000186185	755.374	-1.46174	0.0948186	-15.4162	1.2748e-53	1.64603e-51	ENSG00000186185	KIF18B		ENSG00000226891	37.5198	2.32293	0.129814	17.8943	1.30662e-71	5.74375e-69	ENSG00000226891	LINC01359
ENSG00000276043	1345.11	-1.24471	0.0807865	-15.4074	1.46065e-53	1.86789e-51	ENSG00000276043	UHRF1		ENSG00000270174	5.00293	4.05429	0.22683	17.8737	1.89151e-71	8.2413e-69	ENSG00000270174	AL022097.1
ENSG00000196550	89.0802	-1.4494	0.094079	-15.4062	1.48729e-53	1.89702e-51	ENSG00000196550	FAM72A		ENSG00000162630	32.2484	2.50486	0.140371	17.8446	3.18176e-71	1.35044e-68	ENSG00000162630	B3GALT2
ENSG00000085840	421.874	-1.39649	0.0912275	-15.3078	6.78705e-53	8.35384e-51	ENSG00000085840	ORC1		ENSG00000213003	4.88429	3.27982	0.184002	17.825	4.52453e-71	1.90394e-68	ENSG00000213003	BTF3P12
ENSG00000024526	860.924	-1.53134	0.100401	-15.2523	1.58948e-52	1.90405e-50	ENSG00000024526	DEPDC1		ENSG00000264229	7.56769	3.21401	0.180322	17.8237	4.62491e-71	1.92969e-68	ENSG00000264229	RNU4ATAC
ENSG00000149554	1097.09	-1.12217	0.0737389	-15.2181	2.68192e-52	3.13638e-50	ENSG00000149554	CHEK1		ENSG00000279481	7.13728	3.00523	0.168841	17.7991	7.17906e-71	2.9702e-68	ENSG00000279481	AC104791.2
ENSG00000087586	1599.01	-1.3473	0.0888575	-15.1624	6.27046e-52	7.17953e-50	ENSG00000087586	AURKA		ENSG00000271204	11.0446	3.89869	0.219259	17.7812	9.87594e-71	3.98551e-68	ENSG00000271204	AC016831.5
ENSG00000189057	1569.14	-1.4272	0.0942464	-15.1433	8.39038e-52	9.51825e-50	ENSG00000189057	FAM111B		ENSG00000279020	7.64785	3.87072	0.217726	17.7779	1.04784e-70	4.19426e-68	ENSG00000279020	C18orf15
ENSG00000097046	791.967	-1.19552	0.078969	-15.1391	8.94452e-52	1.01003e-49	ENSG00000097046	CDC7		ENSG00000270409	4.92226	3.28547	0.185066	17.753	1.63342e-70	6.48548e-68	ENSG00000270409	AC090950.1
ENSG00000129810	390.439	-1.38347	0.0915132	-15.1178	1.2369e-51	1.38719e-49	ENSG00000129810	SGO1		ENSG00000236977	6.01039	3.70805	0.209022	17.74	2.05857e-70	8.10815e-68	ENSG00000236977	ANKRD44-IT1
ENSG00000137812	916.491	-1.22832	0.0814074	-15.0885	1.92682e-51	2.12701e-49	ENSG00000137812	KNL1		ENSG00000233783	8.84226	3.2352	0.18244	17.733	2.3315e-70	9.11024e-68	ENSG00000233783	AP001442.1
ENSG00000165490	536.753	-1.23599	0.0819866	-15.0755	2.34764e-51	2.56283e-49	ENSG00000165490	DDIAS		ENSG00000232398	8.85103	2.47762	0.139894	17.7107	3.46666e-70	1.33342e-67	ENSG00000232398	TMPRSS11CP
ENSG00000012048	1259.96	-1.10218	0.0731644	-15.0644	2.7753e-51	3.01632e-49	ENSG00000012048	BRCA1		ENSG00000265727	6.1138	4.02153	0.227574	17.6713	6.97911e-70	2.64315e-67	ENSG00000265727	RN7SL648P
ENSG00000177602	180.462	-1.28193	0.0851133	-15.0615	2.90112e-51	3.13231e-49	ENSG00000177602	HASPIN		ENSG00000224727	8.5387	2.76342	0.156694	17.6358	1.30809e-69	4.91624e-67	ENSG00000224727	FCF1P7
ENSG00000134690	1444.73	-1.33305	0.0887345	-15.0229	5.19507e-51	5.52428e-49	ENSG00000134690	CDCA8		ENSG00000189129	297.069	1.96196	0.111268	17.6327	1.38136e-69	5.15227e-67	ENSG00000189129	PLAC9
ENSG00000188610	77.9037	-1.55198	0.103324	-15.0205	5.38813e-51	5.70493e-49	ENSG00000188610	FAM72B		ENSG00000270722	10.2496	5.2383	0.297214	17.6247	1.59317e-69	5.89759e-67	ENSG00000270722	RF00003
ENSG00000109674	219.433	-1.35455	0.090614	-14.9486	1.59014e-50	1.63785e-48	ENSG00000109674	NEIL3		ENSG00000281325	6.9259	4.13104	0.235019	17.5774	3.66753e-69	1.34752e-66	ENSG00000281325
ENSG00000143476	1874.87	-1.19414	0.0800012	-14.9265	2.21526e-50	2.26748e-48	ENSG00000143476	DTL		ENSG00000235253	11.8501	2.19757	0.12512	17.5637	4.67513e-69	1.705e-66	ENSG00000235253	AC010240.2
ENSG00000066279	2046.39	-1.4308	0.0963786	-14.8456	7.43186e-50	7.34739e-48	ENSG00000066279	ASPM		ENSG00000258891	11.5221	2.279	0.130074	17.5208	9.93652e-69	3.59717e-66	ENSG00000258891	AC005480.1
ENSG00000121957	1580.89	-1.03331	0.0696704	-14.8314	9.17545e-50	9.01685e-48	ENSG00000121957	GPSM2		ENSG00000207392	5.43934	4.11305	0.235161	17.4903	1.69759e-68	6.10068e-66	ENSG00000207392	SNORA20
ENSG00000119969	1126.5	-1.04391	0.0704694	-14.8136	1.19614e-49	1.15926e-47	ENSG00000119969	HELLS		ENSG00000255585	40.8926	1.90576	0.108963	17.4899	1.71149e-68	6.10604e-66	ENSG00000255585	AL590627.1
ENSG00000065328	879.451	-1.57694	0.106799	-14.7655	2.44653e-49	2.32086e-47	ENSG00000065328	MCM10		ENSG00000226312	36.1951	2.25757	0.129325	17.4565	3.07127e-68	1.06486e-65	ENSG00000226312	CFLAR-AS1
ENSG00000126787	1119.62	-1.31427	0.0890288	-14.7623	2.56203e-49	2.42575e-47	ENSG00000126787	DLGAP5		ENSG00000267710	33.5344	2.10799	0.121393	17.3651	1.51735e-67	5.18787e-65	ENSG00000267710	EDDM13
ENSG00000166851	1911.06	-1.36443	0.0931835	-14.6424	1.50606e-48	1.34086e-46	ENSG00000166851	PLK1		ENSG00000204113	6.95969	6.037	0.347712	17.3621	1.5984e-67	5.42728e-65	ENSG00000204113	BMP2KL
ENSG00000112984	1855.68	-1.30751	0.089505	-14.6082	2.48984e-48	2.16199e-46	ENSG00000112984	KIF20A		ENSG00000264546	5.96745	2.82474	0.163007	17.329	2.84305e-67	9.52209e-65	ENSG00000264546	AC008026.3
ENSG00000122952	2591.39	-1.05798	0.0726078	-14.5711	4.2889e-48	3.64069e-46	ENSG00000122952	ZWINT		ENSG00000134007	7.86711	2.41598	0.140093	17.2455	1.20923e-66	4.02265e-64	ENSG00000134007	ADAM20
ENSG00000186871	437.912	-1.20632	0.0827968	-14.5696	4.38259e-48	3.71381e-46	ENSG00000186871	ERCC6L		ENSG00000257474	4.4086	3.68783	0.214248	17.2129	2.12661e-66	6.98011e-64	ENSG00000257474	AC027288.1
ENSG00000187741	741.475	-1.24588	0.0856459	-14.5469	6.11412e-48	5.13691e-46	ENSG00000187741	FANCA		ENSG00000269535	6.50423	2.89271	0.168417	17.1758	4.02791e-66	1.29615e-63	ENSG00000269535	AC010320.4
ENSG00000138180	1482.76	-1.31424	0.0924598	-14.2141	7.48825e-46	5.22204e-44	ENSG00000138180	CEP55		ENSG00000279110	18.8864	2.29641	0.133697	17.1762	4.00377e-66	1.29615e-63	ENSG00000279110	AL022323.4
ENSG00000051341	530.282	-1.22838	0.0868391	-14.1455	1.99057e-45	1.34068e-43	ENSG00000051341	POLQ		ENSG00000214188	12.8502	2.53101	0.147379	17.1735	4.19388e-66	1.34079e-63	ENSG00000214188	ST7-OT4
ENSG00000172167	567.062	-1.0438	0.0745394	-14.0033	1.48848e-44	9.43166e-43	ENSG00000172167	MTBP		ENSG00000250698	4.69131	5.13641	0.299355	17.1582	5.45426e-66	1.73248e-63	ENSG00000250698	AC131182.1
ENSG00000146670	1777.32	-1.27347	0.0913109	-13.9466	3.30186e-44	2.06299e-42	ENSG00000146670	CDCA5		ENSG00000264513	8.40299	3.26614	0.190404	17.1537	5.89583e-66	1.86074e-63	ENSG00000264513	AC006270.1
ENSG00000011426	2876.48	-1.36965	0.0983055	-13.9326	4.01711e-44	2.48778e-42	ENSG00000011426	ANLN		ENSG00000240499	22.8026	2.51926	0.147132	17.1224	1.01073e-65	3.16957e-63	ENSG00000240499	AC004594.1
ENSG00000170312	2858.54	-1.17372	0.0843108	-13.9213	4.70061e-44	2.89649e-42	ENSG00000170312	CDK1		ENSG00000256188	6.37686	3.7096	0.217015	17.0937	1.65305e-65	5.15104e-63	ENSG00000256188	TAS2R30
ENSG00000165304	1308.6	-1.38588	0.0995926	-13.9155	5.10316e-44	3.12882e-42	ENSG00000165304	MELK		ENSG00000235865	58.6218	1.97612	0.115828	17.0608	2.90447e-65	8.93741e-63	ENSG00000235865	GSN-AS1
ENSG00000182481	9649.21	-1.08442	0.0794479	-13.6495	2.0325e-42	1.11559e-40	ENSG00000182481	KPNA2		ENSG00000226380	66.3707	2.01125	0.118064	17.0353	4.49569e-65	1.37479e-62	ENSG00000226380	AC016831.1
ENSG00000139734	709.043	-1.2602	0.0923716	-13.6427	2.23011e-42	1.22133e-40	ENSG00000139734	DIAPH3		ENSG00000263740	17.7622	2.85678	0.168123	16.9922	9.38259e-65	2.834e-62	ENSG00000263740	RN7SL4P
ENSG00000165480	644.208	-1.22041	0.0896233	-13.6171	3.17016e-42	1.70953e-40	ENSG00000165480	SKA3		ENSG00000242602	4.03796	4.17313	0.245639	16.9888	9.93234e-65	2.98176e-62	ENSG00000242602	AC008953.1
ENSG00000171848	3450.76	-1.28794	0.0946079	-13.6134	3.33178e-42	1.78689e-40	ENSG00000171848	RRM2		ENSG00000267529	14.6989	3.24324	0.191013	16.9792	1.17108e-64	3.49435e-62	ENSG00000267529	AP005131.4
ENSG00000175643	1049.45	-1.09156	0.0806269	-13.5384	9.27663e-42	4.85362e-40	ENSG00000175643	RMI2		ENSG00000215156	20.2455	2.61655	0.154156	16.9734	1.29326e-64	3.83569e-62	ENSG00000215156	AC138409.1
ENSG00000154839	518.906	-1.31335	0.0970758	-13.5291	1.05255e-41	5.48955e-40	ENSG00000154839	SKA1		ENSG00000272483	3.94786	3.43657	0.202623	16.9604	1.61319e-64	4.75592e-62	ENSG00000272483	AC022001.3
ENSG00000075218	791.539	-1.21178	0.0902559	-13.426	4.25681e-41	2.14294e-39	ENSG00000075218	GTSE1		ENSG00000259498	68.1846	2.14157	0.126335	16.9515	1.87599e-64	5.46524e-62	ENSG00000259498	TPM1-AS
ENSG00000142945	1747.74	-1.28027	0.0954333	-13.4154	4.91382e-41	2.45861e-39	ENSG00000142945	KIF2C		ENSG00000223653	18.0339	1.99046	0.117532	16.9354	2.46476e-64	7.05523e-62	ENSG00000223653	AL078459.1
ENSG00000136982	684.551	-1.13241	0.0845028	-13.4009	5.97709e-41	2.9635e-39	ENSG00000136982	DSCC1		ENSG00000219881	4.44482	3.1979	0.188825	16.9358	2.45069e-64	7.05523e-62	ENSG00000219881	GAPDHP42
ENSG00000237649	2205.5	-1.16894	0.0876783	-13.3322	1.50445e-40	7.25468e-39	ENSG00000237649	KIFC1		ENSG00000161281	423.573	1.71715	0.101494	16.9186	3.2802e-64	9.33511e-62	ENSG00000161281	COX7A1
ENSG00000183856	2464.3	-1.21504	0.0913391	-13.3026	2.2369e-40	1.06407e-38	ENSG00000183856	IQGAP3		ENSG00000244203	6.07021	2.84178	0.168224	16.8928	5.08063e-64	1.42937e-61	ENSG00000244203	FOXP1-AS1
ENSG00000168078	901.29	-1.23128	0.0931153	-13.2232	6.44832e-40	2.92336e-38	ENSG00000168078	PBK		ENSG00000201793	8.60195	6.64482	0.393786	16.8742	6.96878e-64	1.94944e-61	ENSG00000201793	RN7SKP9
ENSG00000105011	1671.54	-1.00573	0.0768531	-13.0864	3.94012e-39	1.67849e-37	ENSG00000105011	ASF1B		ENSG00000273792	9.1185	2.45325	0.145447	16.867	7.87017e-64	2.18915e-61	ENSG00000273792	AC022898.2
ENSG00000176244	76.732	-1.67819	0.128412	-13.0688	4.96738e-39	2.10649e-37	ENSG00000176244	ACBD7		ENSG00000168298	60.7299	2.52888	0.150431	16.8109	2.02957e-63	5.58235e-61	ENSG00000168298	HIST1H1E
ENSG00000147536	623.874	-1.27746	0.0981667	-13.0132	1.0294e-38	4.24826e-37	ENSG00000147536	GINS4		ENSG00000272610	16.399	2.27779	0.135527	16.8069	2.17298e-63	5.94358e-61	ENSG00000272610	MAGI1-IT1
ENSG00000184661	612.349	-1.39203	0.107249	-12.9794	1.60137e-38	6.50509e-37	ENSG00000184661	CDCA2		ENSG00000184113	640.285	1.92509	0.114569	16.8028	2.3268e-63	6.32916e-61	ENSG00000184113	CLDN5
ENSG00000158402	374.792	-1.07179	0.0828843	-12.9312	3.00181e-38	1.1909e-36	ENSG00000158402	CDC25C		ENSG00000279608	12.7446	2.37098	0.141307	16.7789	3.48222e-63	9.41997e-61	ENSG00000279608	AL353795.3
ENSG00000123485	959.342	-1.18309	0.0915189	-12.9273	3.15753e-38	1.25067e-36	ENSG00000123485	HJURP		ENSG00000279841	10.4167	2.2813	0.136083	16.7641	4.46969e-63	1.19598e-60	ENSG00000279841	AC092135.3
ENSG00000171241	756.395	-1.11522	0.0864861	-12.8948	4.81302e-38	1.88516e-36	ENSG00000171241	SHCBP1		ENSG00000279765	35.6841	1.82818	0.109063	16.7627	4.57488e-63	1.21751e-60	ENSG00000279765	AC013394.1
ENSG00000080986	1006.79	-1.20431	0.0938673	-12.8299	1.11462e-37	4.25077e-36	ENSG00000080986	NDC80		ENSG00000239351	5.16683	2.88356	0.172058	16.7593	4.84545e-63	1.28259e-60	ENSG00000239351	NPM1P29
ENSG00000157851	100.426	-3.80913	0.297789	-12.7914	1.83188e-37	6.83783e-36	ENSG00000157851	DPYSL5		ENSG00000225140	7.78475	3.28459	0.196414	16.7228	8.94714e-63	2.33071e-60	ENSG00000225140	AL358216.1
ENSG00000164045	528.766	-1.21288	0.0953786	-12.7165	4.7872e-37	1.74329e-35	ENSG00000164045	CDC25A		ENSG00000204683	4.39842	3.67027	0.219663	16.7086	1.13395e-62	2.93837e-60	ENSG00000204683	C10orf113
ENSG00000076382	2255.31	-1.10013	0.0873967	-12.5878	2.46547e-36	8.59666e-35	ENSG00000076382	SPAG5		ENSG00000225192	7.39733	2.59294	0.155475	16.6776	1.90822e-62	4.89319e-60	ENSG00000225192	ZNF33BP1
ENSG00000146410	251.36	-1.18038	0.0946896	-12.4658	1.14735e-35	3.82973e-34	ENSG00000146410	MTFR2		ENSG00000278771	34.4356	2.97817	0.178739	16.6621	2.47217e-62	6.27396e-60	ENSG00000278771	RN7SL3
ENSG00000134602	1682.02	-1.15145	0.0926388	-12.4294	1.80915e-35	5.92626e-34	ENSG00000134602	STK26		ENSG00000232564	9.0025	2.4465	0.146835	16.6616	2.49298e-62	6.29432e-60	ENSG00000232564	AL031594.1
ENSG00000169085	253.295	-2.068	0.167062	-12.3787	3.41017e-35	1.09521e-33	ENSG00000169085	C8orf46		ENSG00000146006	48.7542	2.16946	0.130218	16.6602	2.55153e-62	6.40928e-60	ENSG00000146006	LRRTM2
ENSG00000157456	1539.07	-1.13023	0.0913972	-12.3662	3.9839e-35	1.27449e-33	ENSG00000157456	CCNB2		ENSG00000226017	5.062	3.16632	0.190078	16.658	2.6478e-62	6.61734e-60	ENSG00000226017	PRICKLE2-AS3
ENSG00000117632	13092.8	-1.01207	0.0818498	-12.3649	4.04653e-35	1.29033e-33	ENSG00000117632	STMN1		ENSG00000243402	4.98651	3.96864	0.238401	16.6469	3.18518e-62	7.92015e-60	ENSG00000243402	AC022973.1
ENSG00000140534	618.231	-1.21323	0.0984093	-12.3284	6.36702e-35	1.99031e-33	ENSG00000140534	TICRR		ENSG00000232493	3.85786	3.16687	0.190251	16.6458	3.24667e-62	8.03248e-60	ENSG00000232493	RPL12P11
ENSG00000183150	108.73	-1.3639	0.111116	-12.2746	1.24064e-34	3.76583e-33	ENSG00000183150	GPR19		ENSG00000221676	5.1245	3.48174	0.209238	16.6401	3.57153e-62	8.79203e-60	ENSG00000221676	RNU6ATAC
ENSG00000197299	653.852	-1.02334	0.0834716	-12.2598	1.48898e-34	4.4837e-33	ENSG00000197299	BLM		ENSG00000281195	43.8528	2.16205	0.129974	16.6345	3.92311e-62	9.60948e-60	ENSG00000281195	AC007878.1
ENSG00000077152	1450.3	-1.04863	0.0855961	-12.2509	1.6608e-34	4.96766e-33	ENSG00000077152	UBE2T		ENSG00000277152	10.029	2.41999	0.145588	16.6222	4.81487e-62	1.17354e-59	ENSG00000277152	AC110048.2
ENSG00000143228	1101.31	-1.19255	0.0985565	-12.1001	1.05438e-33	2.97485e-32	ENSG00000143228	NUF2		ENSG00000279476	4.702	3.61804	0.217833	16.6092	5.97546e-62	1.44214e-59	ENSG00000279476	AC092139.3
ENSG00000071539	1284.58	-1.11471	0.0926924	-12.026	2.59583e-33	7.05705e-32	ENSG00000071539	TRIP13		ENSG00000239835	4.41785	4.99732	0.301117	16.596	7.4533e-62	1.78134e-59	ENSG00000239835	AC092910.1
ENSG00000143401	5061.52	-1.03533	0.0863012	-11.9967	3.69558e-33	9.96975e-32	ENSG00000143401	ANP32E		ENSG00000105373	14489.3	1.15722	0.0698112	16.5764	1.03157e-61	2.45354e-59	ENSG00000105373	NOP53
ENSG00000102098	242.448	-1.266	0.107612	-11.7644	5.95487e-32	1.46518e-30	ENSG00000102098	SCML2		ENSG00000257279	14.578	2.19307	0.132358	16.5693	1.1626e-61	2.75189e-59	ENSG00000257279	AC127164.1
ENSG00000101057	3629.8	-1.42384	0.121167	-11.751	6.97552e-32	1.70777e-30	ENSG00000101057	MYBL2		ENSG00000248115	6.69988	2.6424	0.15963	16.5532	1.51752e-61	3.55779e-59	ENSG00000248115	AC023154.1
ENSG00000093009	676.349	-1.11095	0.0955224	-11.6303	2.89198e-31	6.74484e-30	ENSG00000093009	CDC45		ENSG00000218676	4.48163	3.16736	0.191523	16.5377	1.96325e-61	4.55937e-59	ENSG00000218676	BRD7P4
ENSG00000115163	477.256	-1.21872	0.105047	-11.6016	4.04268e-31	9.34009e-30	ENSG00000115163	CENPA		ENSG00000236986	8.25892	2.60033	0.157264	16.5349	2.05828e-61	4.75232e-59	ENSG00000236986	AL157938.2
ENSG00000144354	669.474	-1.67164	0.144213	-11.5915	4.55357e-31	1.04958e-29	ENSG00000144354	CDCA7		ENSG00000213613	12.6859	1.9087	0.115436	16.5347	2.06564e-61	4.75232e-59	ENSG00000213613	RPL11P3
ENSG00000267374	87.4419	-1.30411	0.112607	-11.5811	5.13915e-31	1.18179e-29	ENSG00000267374	AC016205.1		ENSG00000224822	8.72119	3.03356	0.183649	16.5182	2.71446e-61	6.18721e-59	ENSG00000224822	THRB-IT1
ENSG00000089685	2971.46	-1.19858	0.104525	-11.4669	1.93515e-30	4.26288e-29	ENSG00000089685	BIRC5		ENSG00000212664	32.6521	1.5888	0.0962234	16.5116	3.02997e-61	6.87453e-59	ENSG00000212664	AC064799.1
ENSG00000224040	10.7594	-1.235	0.109136	-11.3161	1.09212e-29	2.27698e-28	ENSG00000224040	HMGN1P4		ENSG00000217527	5.26761	3.84723	0.233009	16.5111	3.0541e-61	6.8975e-59	ENSG00000217527	RPS16P5
ENSG00000253954	18.4197	-1.00236	0.0890081	-11.2614	2.03508e-29	4.16612e-28	ENSG00000253954	HMGN1P38		ENSG00000214359	6.68183	2.59787	0.157432	16.5016	3.57561e-61	8.03842e-59	ENSG00000214359	RPL18P10
ENSG00000154920	332.458	-1.066	0.0951034	-11.2089	3.68879e-29	7.40375e-28	ENSG00000154920	EME1		ENSG00000226205	4.59069	3.21009	0.194633	16.493	4.12102e-61	9.22247e-59	ENSG00000226205	AC007790.1
ENSG00000094804	1875.12	-1.27467	0.114328	-11.1493	7.21904e-29	1.41885e-27	ENSG00000094804	CDC6		ENSG00000279465	2.99073	3.94278	0.239093	16.4905	4.29074e-61	9.55883e-59	ENSG00000279465	AC090950.2
ENSG00000135451	903.83	-1.06278	0.0961963	-11.048	2.24101e-28	4.24198e-27	ENSG00000135451	TROAP		ENSG00000269189	5.30089	4.60643	0.279369	16.4887	4.42393e-61	9.81115e-59	ENSG00000269189	AL445223.1
ENSG00000174871	305.864	-1.22197	0.112957	-10.8181	2.8272e-27	4.93771e-26	ENSG00000174871	CNIH2		ENSG00000202058	19.5674	2.14427	0.130179	16.4717	5.8608e-61	1.29395e-58	ENSG00000202058	RN7SKP80
ENSG00000129195	468.565	-1.10198	0.101945	-10.8095	3.10288e-27	5.40768e-26	ENSG00000129195	PIMREG		ENSG00000236583	4.84595	3.31848	0.201913	16.4352	1.07127e-60	2.33375e-58	ENSG00000236583	AP004290.1
ENSG00000185697	1173.06	-1.30523	0.121504	-10.7423	6.44023e-27	1.09149e-25	ENSG00000185697	MYBL1		ENSG00000259165	9.3147	2.3569	0.143435	16.4318	1.13201e-60	2.45522e-58	ENSG00000259165	DDX18P1
ENSG00000230257	40.0714	-3.22094	0.300247	-10.7276	7.54998e-27	1.27082e-25	ENSG00000230257	NFE4		ENSG00000240531	4.01959	3.26365	0.199168	16.3864	2.39188e-60	5.12008e-58	ENSG00000240531	RPL21P123
ENSG00000226738	125.447	-2.19234	0.204703	-10.7099	9.14721e-27	1.52662e-25	ENSG00000226738	U62317.1		ENSG00000229456	4.96627	4.14121	0.252947	16.3719	3.03664e-60	6.46409e-58	ENSG00000229456	RLIMP1
ENSG00000111331	8903	-1.02421	0.0977145	-10.4817	1.04892e-25	1.61737e-24	ENSG00000111331	OAS3		ENSG00000207344	3.96309	4.11601	0.25141	16.3717	3.046e-60	6.46409e-58	ENSG00000207344	SNORA22C
ENSG00000149485	2174.5	-1.07143	0.103468	-10.3552	3.96369e-25	5.84101e-24	ENSG00000149485	FADS1		ENSG00000125414	11.3365	2.49502	0.152515	16.3592	3.73998e-60	7.86897e-58	ENSG00000125414	MYH2
ENSG00000101746	49.6099	-2.34855	0.230171	-10.2035	1.9129e-24	2.66571e-23	ENSG00000101746	NOL4		ENSG00000227417	5.11945	3.6538	0.2234	16.3554	3.97806e-60	8.33428e-58	ENSG00000227417	AC114402.2
ENSG00000091651	491.011	-1.01005	0.0996535	-10.1356	3.83922e-24	5.23311e-23	ENSG00000091651	ORC6		ENSG00000230946	4.48927	3.28072	0.200596	16.3549	4.01537e-60	8.37681e-58	ENSG00000230946	HNRNPA1P68
ENSG00000241697	6.04433	-1.79266	0.177013	-10.1273	4.18036e-24	5.68867e-23	ENSG00000241697	TMEFF1		ENSG00000266541	4.38559	3.01411	0.18473	16.3163	7.55601e-60	1.56308e-57	ENSG00000266541	AP001381.1
ENSG00000267506	22.0615	-1.75861	0.181594	-9.68432	3.51553e-22	4.13779e-21	ENSG00000267506	AC021683.2		ENSG00000280055	16.898	2.7316	0.167414	16.3165	7.53816e-60	1.56308e-57	ENSG00000280055	TMEM75
ENSG00000133124	11.941	-2.95731	0.30733	-9.62258	6.4198e-22	7.40564e-21	ENSG00000133124	IRS4		ENSG00000254911	24.1294	2.11697	0.130045	16.2787	1.39734e-59	2.84284e-57	ENSG00000254911	SCARNA9
ENSG00000169684	142.286	-1.26467	0.131963	-9.58348	9.38299e-22	1.06418e-20	ENSG00000169684	CHRNA5		ENSG00000211459	67924.5	1.80483	0.110881	16.2771	1.43418e-59	2.90577e-57	ENSG00000211459	MT-RNR1
ENSG00000157193	871.153	-1.00022	0.10465	-9.55779	1.20295e-21	1.35373e-20	ENSG00000157193	LRP8		ENSG00000232490	4.61099	3.54343	0.217961	16.2571	1.98864e-59	4.01265e-57	ENSG00000232490	OSBPL10-AS1
ENSG00000178999	853.11	-1.00445	0.107173	-9.37225	7.10014e-21	7.51114e-20	ENSG00000178999	AURKB		ENSG00000244226	4.02014	3.29308	0.202651	16.25	2.23398e-59	4.47104e-57	ENSG00000244226	ILF2P1
ENSG00000261762	47.81	-1.27042	0.135958	-9.34417	9.26135e-21	9.70569e-20	ENSG00000261762	AC027228.2		ENSG00000207233	3.51307	4.48895	0.276278	16.248	2.30917e-59	4.60281e-57	ENSG00000207233	SNORA37
ENSG00000257743	148.865	-1.98922	0.213585	-9.31346	1.23738e-20	1.28553e-19	ENSG00000257743	MGAM2		ENSG00000236478	5.83807	3.10397	0.191054	16.2466	2.36258e-59	4.69029e-57	ENSG00000236478	AC012513.2
ENSG00000165621	82.0619	-1.90918	0.205061	-9.31028	1.27493e-20	1.3237e-19	ENSG00000165621	OXGR1		ENSG00000230590	194.866	1.59219	0.0980192	16.2437	2.47629e-59	4.89629e-57	ENSG00000230590	FTX
ENSG00000105173	555.413	-1.27584	0.137054	-9.30901	1.29034e-20	1.33857e-19	ENSG00000105173	CCNE1		ENSG00000264853	6.54656	3.28076	0.202196	16.2256	3.32266e-59	6.54352e-57	ENSG00000264853	AC011933.2
ENSG00000267201	6.6372	-1.00273	0.107742	-9.3068	1.31747e-20	1.36441e-19	ENSG00000267201	LINC01775		ENSG00000229052	4.74349	2.85829	0.176341	16.2089	4.36071e-59	8.51965e-57	ENSG00000229052	AL449283.1
ENSG00000215784	42.4319	-1.06811	0.114832	-9.30149	1.38495e-20	1.43129e-19	ENSG00000215784	FAM72D		ENSG00000241112	14.8838	2.48267	0.15317	16.2086	4.38475e-59	8.53276e-57	ENSG00000241112	RPL29P14
ENSG00000143494	670.404	-1.08793	0.117479	-9.26068	2.03139e-20	2.07411e-19	ENSG00000143494	VASH2		ENSG00000251586	3.89004	3.16627	0.195379	16.2058	4.58602e-59	8.8893e-57	ENSG00000251586	TET2-AS1
ENSG00000175093	69.5546	-1.33242	0.14421	-9.23945	2.47771e-20	2.51003e-19	ENSG00000175093	SPSB4		ENSG00000258485	3.95793	3.84478	0.237303	16.202	4.88252e-59	9.39007e-57	ENSG00000258485	SRMP2
ENSG00000072041	168.901	-2.67116	0.290753	-9.18702	4.03857e-20	4.00796e-19	ENSG00000072041	SLC6A15		ENSG00000233334	8.15333	2.76567	0.171081	16.1658	8.78218e-59	1.6759e-56	ENSG00000233334	FAM53B-AS1
ENSG00000174607	470.356	-1.83973	0.200536	-9.17407	4.55504e-20	4.49875e-19	ENSG00000174607	UGT8		ENSG00000172247	28.0384	2.12375	0.131468	16.1541	1.06225e-58	2.01148e-56	ENSG00000172247	C1QTNF4
ENSG00000189127	19.2554	-2.02132	0.220954	-9.14814	5.79228e-20	5.67517e-19	ENSG00000189127	ANKRD34B		ENSG00000213046	4.6125	3.81665	0.236319	16.1504	1.1279e-58	2.12763e-56	ENSG00000213046	EEF1A1P32
ENSG00000232363	6.87822	-1.10749	0.121104	-9.14499	5.96336e-20	5.8335e-19	ENSG00000232363	AL021391.1		ENSG00000266805	7.3351	2.40154	0.148725	16.1475	1.18234e-58	2.2218e-56	ENSG00000266805	AP005432.1
ENSG00000224763	3.27084	-1.20796	0.132449	-9.12024	7.49585e-20	7.26192e-19	ENSG00000224763	FDPSP8		ENSG00000229502	4.38991	4.14086	0.256453	16.1467	1.19894e-58	2.24444e-56	ENSG00000229502	AL391863.1
ENSG00000106689	51.8604	-1.59967	0.175485	-9.11574	7.81364e-20	7.55196e-19	ENSG00000106689	LHX2		ENSG00000279175	6.58339	2.57857	0.159806	16.1356	1.43462e-58	2.67546e-56	ENSG00000279175	AL033543.1
ENSG00000171551	129.475	-1.53049	0.168657	-9.07457	1.1413e-19	1.0896e-18	ENSG00000171551	ECEL1		ENSG00000242290	4.36194	4.72781	0.293045	16.1334	1.48649e-58	2.76173e-56	ENSG00000242290	ZBTB20-AS5
ENSG00000158164	181.551	-1.49616	0.165256	-9.05356	1.38383e-19	1.31148e-18	ENSG00000158164	TMSB15A		ENSG00000281016	6.75034	2.79656	0.173345	16.133	1.49643e-58	2.76974e-56	ENSG00000281016	AC092574.2
ENSG00000136231	60.9299	-1.86316	0.206462	-9.02424	1.80943e-19	1.70141e-18	ENSG00000136231	IGF2BP3		ENSG00000258730	4.92202	3.18642	0.197643	16.1221	1.78379e-58	3.28926e-56	ENSG00000258730	ITPK1-AS1
ENSG00000137142	34.2961	-1.49819	0.167774	-8.92982	4.26701e-19	3.89041e-18	ENSG00000137142	IGFBPL1		ENSG00000228677	12.1128	1.9232	0.119345	16.1147	2.01092e-58	3.68051e-56	ENSG00000228677	TTC3-AS1
ENSG00000270977	61.5635	-1.10214	0.123768	-8.90488	5.34453e-19	4.837e-18	ENSG00000270977	AC015849.5		ENSG00000235347	4.36322	3.71206	0.2304	16.1113	2.12369e-58	3.87252e-56	ENSG00000235347	Z84478.1
ENSG00000197587	44.1688	-1.44386	0.163026	-8.85663	8.24679e-19	7.35548e-18	ENSG00000197587	DMBX1		ENSG00000279159	261.479	1.61044	0.100083	16.091	2.95054e-58	5.28243e-56	ENSG00000279159	AC003681.1
ENSG00000114805	743.241	-1.46483	0.165403	-8.85614	8.28298e-19	7.38642e-18	ENSG00000114805	PLCH1		ENSG00000236494	4.17769	2.78601	0.173233	16.0824	3.38823e-58	6.02225e-56	ENSG00000236494	AC008080.4
ENSG00000185559	179.697	-3.07391	0.352021	-8.73217	2.49826e-18	2.14808e-17	ENSG00000185559	DLK1		ENSG00000279425	83.6961	1.72701	0.107392	16.0813	3.44936e-58	6.10883e-56	ENSG00000279425	AC092279.2
ENSG00000197472	156.467	-1.1188	0.128365	-8.71579	2.88749e-18	2.47068e-17	ENSG00000197472	ZNF695		ENSG00000255159	3.77821	4.25249	0.264688	16.0661	4.41203e-58	7.78574e-56	ENSG00000255159	AC026894.1
ENSG00000178150	44.3605	-1.02668	0.117892	-8.70863	3.07565e-18	2.62301e-17	ENSG00000178150	ZNF114		ENSG00000261868	5.74949	3.32986	0.207422	16.0536	5.39397e-58	9.45077e-56	ENSG00000261868	MFSD1P1
ENSG00000273274	26.4401	-1.67087	0.193471	-8.63628	5.80753e-18	4.83967e-17	ENSG00000273274	ZBTB8B		ENSG00000258983	5.11662	2.82236	0.175894	16.0458	6.11439e-58	1.0675e-55	ENSG00000258983	AL162171.2
ENSG00000081985	168.233	-1.5902	0.184423	-8.62255	6.54802e-18	5.42919e-17	ENSG00000081985	IL12RB2		ENSG00000239503	5.26328	3.46982	0.216478	16.0285	8.08222e-58	1.39133e-55	ENSG00000239503	MARK2P8
ENSG00000077935	131.554	-1.41112	0.164374	-8.58479	9.09998e-18	7.46217e-17	ENSG00000077935	SMC1B		ENSG00000278999	6.40846	2.61871	0.163453	16.0212	9.09245e-58	1.55978e-55	ENSG00000278999	AC008985.1
ENSG00000005513	334.465	-1.75442	0.204396	-8.58346	9.20647e-18	7.54697e-17	ENSG00000005513	SOX8		ENSG00000279416	3.06182	4.2524	0.266076	15.9819	1.70834e-57	2.92044e-55	ENSG00000279416	AC099689.1
ENSG00000271013	28.0389	-1.22278	0.142829	-8.56117	1.11725e-17	9.09353e-17	ENSG00000271013	LRRC37A9P		ENSG00000251682	4.08954	3.52379	0.22056	15.9766	1.86077e-57	3.17e-55	ENSG00000251682	AC122718.2
ENSG00000184486	7.90965	-1.57257	0.183989	-8.54706	1.2626e-17	1.02343e-16	ENSG00000184486	POU3F2		ENSG00000270742	5.78653	3.02309	0.189357	15.965	2.23939e-57	3.80186e-55	ENSG00000270742	AC096947.1
ENSG00000181418	38.3281	-1.46967	0.1722	-8.53463	1.40599e-17	1.13519e-16	ENSG00000181418	DDN		ENSG00000173862	4.02126	2.61205	0.163635	15.9627	2.32504e-57	3.93371e-55	ENSG00000173862	AC008080.1
ENSG00000255750	15.192	-1.66274	0.197853	-8.40392	4.31799e-17	3.35001e-16	ENSG00000255750	AC022509.1		ENSG00000228149	8.384	1.92373	0.120647	15.9451	3.08315e-57	5.19849e-55	ENSG00000228149	RPL3P1
ENSG00000188338	340.637	-1.3982	0.166923	-8.37633	5.4604e-17	4.20189e-16	ENSG00000188338	SLC38A3		ENSG00000279652	13.0001	2.12243	0.133198	15.9344	3.65775e-57	6.1046e-55	ENSG00000279652	Z82217.1
ENSG00000158887	82.593	-1.11565	0.133932	-8.33002	8.08267e-17	6.12407e-16	ENSG00000158887	MPZ		ENSG00000249019	4.3566	4.35017	0.273035	15.9326	3.76178e-57	6.25702e-55	ENSG00000249019	AC108471.1
ENSG00000216867	3.21455	-1.16314	0.139659	-8.32843	8.19196e-17	6.20402e-16	ENSG00000216867	RPL22P12		ENSG00000213871	4.14289	3.36184	0.211028	15.9308	3.8758e-57	6.42496e-55	ENSG00000213871	TAF9BP1
ENSG00000103257	8081.87	-1.07478	0.129271	-8.31419	9.23825e-17	6.95894e-16	ENSG00000103257	SLC7A5		ENSG00000224083	5.95531	2.79296	0.175325	15.9302	3.91407e-57	6.46662e-55	ENSG00000224083	MTCO1P11
ENSG00000135454	364.495	-1.03295	0.124834	-8.27457	1.28915e-16	9.56594e-16	ENSG00000135454	B4GALNT1		ENSG00000251562	19428.1	1.90695	0.119743	15.9254	4.22481e-57	6.95666e-55	ENSG00000251562	MALAT1
ENSG00000100167	1202.32	-1.11742	0.135121	-8.26976	1.34227e-16	9.93763e-16	ENSG00000100167	2003-09-01		ENSG00000221962	4.86023	5.08686	0.319439	15.9244	4.29377e-57	7.04665e-55	ENSG00000221962	TMEM14EP
ENSG00000265763	63.2783	-1.31745	0.159664	-8.2514	1.56553e-16	1.15282e-15	ENSG00000265763	ZNF488		ENSG00000183535	3.40981	3.73579	0.234602	15.9239	4.32213e-57	7.06962e-55	ENSG00000183535	COL18A1-AS1
ENSG00000262406	447.28	-1.67911	0.203787	-8.23954	1.72876e-16	1.2679e-15	ENSG00000262406	MMP12		ENSG00000272506	4.83784	2.6166	0.164386	15.9175	4.79519e-57	7.79162e-55	ENSG00000272506	AL357078.3
ENSG00000100473	221.566	-1.49605	0.182075	-8.21666	2.09243e-16	1.52372e-15	ENSG00000100473	COCH		ENSG00000131055	113.542	1.3377	0.0840942	15.9072	5.65089e-57	9.15184e-55	ENSG00000131055	COX4I2
ENSG00000177359	243.333	-1.64625	0.200396	-8.21497	2.12219e-16	1.54448e-15	ENSG00000177359	AC024940.2		ENSG00000234428	10.6598	2.56606	0.161474	15.8915	7.25489e-57	1.17111e-54	ENSG00000234428	AC023051.1
ENSG00000183145	208.528	-1.05213	0.128818	-8.16756	3.1469e-16	2.25457e-15	ENSG00000183145	RIPPLY3		ENSG00000276255	8.56336	2.42688	0.153012	15.8607	1.18574e-56	1.87713e-54	ENSG00000276255	AL136379.1
ENSG00000115507	253.865	-1.13664	0.139809	-8.12994	4.29501e-16	3.03953e-15	ENSG00000115507	OTX1		ENSG00000280383	52.3034	1.76774	0.111672	15.8297	1.9401e-56	3.05173e-54	ENSG00000280383	Z95331.1
ENSG00000137561	52.4775	-1.28373	0.159183	-8.06452	7.35247e-16	5.10422e-15	ENSG00000137561	TTPA		ENSG00000099624	2879.41	1.28464	0.0811636	15.8277	2.00293e-56	3.13054e-54	ENSG00000099624	ATP5F1D
ENSG00000223723	11.3171	-1.37099	0.1712	-8.00816	1.1644e-15	7.94459e-15	ENSG00000223723	BX842568.2		ENSG00000249609	3.4025	2.92857	0.185069	15.8243	2.11702e-56	3.2984e-54	ENSG00000249609	AC080188.1
ENSG00000130055	45.6075	-1.40325	0.175279	-8.00584	1.18649e-15	8.08636e-15	ENSG00000130055	GDPD2		ENSG00000258012	4.05514	3.21537	0.203361	15.8111	2.608e-56	4.0378e-54	ENSG00000258012	AC026111.1
ENSG00000184599	65.2501	-1.49637	0.187532	-7.97926	1.4721e-15	9.95434e-15	ENSG00000184599	FAM19A3		ENSG00000279555	18.9387	2.3662	0.149704	15.8059	2.83418e-56	4.37423e-54	ENSG00000279555	AC091181.1
ENSG00000180537	120.122	-1.45544	0.183445	-7.9339	2.12362e-15	1.41865e-14	ENSG00000180537	RNF182		ENSG00000256981	5.32311	3.12284	0.19764	15.8007	3.07887e-56	4.73703e-54	ENSG00000256981	AC134349.2
ENSG00000142549	23.6153	-1.21058	0.152854	-7.91982	2.37855e-15	1.5808e-14	ENSG00000142549	IGLON5		ENSG00000279598	5.3582	3.26084	0.206408	15.798	3.20957e-56	4.92274e-54	ENSG00000279598	AC009948.5
ENSG00000166396	84.4233	-1.66734	0.210986	-7.90261	2.73133e-15	1.8043e-14	ENSG00000166396	SERPINB7		ENSG00000260229	4.37189	2.60465	0.164938	15.7916	3.55178e-56	5.4307e-54	ENSG00000260229	PPIAP51
ENSG00000134873	38.2518	-1.54494	0.195831	-7.88918	3.04184e-15	2.00216e-14	ENSG00000134873	CLDN10		ENSG00000180662	3.18774	3.14634	0.199243	15.7914	3.56496e-56	5.43398e-54	ENSG00000180662	RPL21P8
ENSG00000163009	38.3778	-1.09337	0.139234	-7.85277	4.06949e-15	2.65093e-14	ENSG00000163009	C2orf48		ENSG00000279390	13.7341	3.06591	0.194154	15.7911	3.58136e-56	5.44213e-54	ENSG00000279390	AF127577.6
ENSG00000255774	252.354	-1.74185	0.222144	-7.84109	4.4666e-15	2.90309e-14	ENSG00000255774	AP000439.2		ENSG00000252213	5.68081	5.23718	0.331726	15.7876	3.78467e-56	5.73337e-54	ENSG00000252213	SNORA74D
ENSG00000273706	28.796	-2.68504	0.342903	-7.83032	4.86637e-15	3.15542e-14	ENSG00000273706	LHX1		ENSG00000274421	5.77922	2.85208	0.180863	15.7693	5.06232e-56	7.57563e-54	ENSG00000274421	AL162390.1
ENSG00000146013	81.2689	-1.62994	0.208477	-7.81831	5.35379e-15	3.45917e-14	ENSG00000146013	GFRA3		ENSG00000228816	4.54939	3.27351	0.207923	15.7439	7.56929e-56	1.12929e-53	ENSG00000228816	AK3P5
ENSG00000109255	100.924	-1.44339	0.184975	-7.80317	6.03702e-15	3.8767e-14	ENSG00000109255	NMU		ENSG00000279029	13.4744	2.66707	0.169423	15.7421	7.78687e-56	1.15824e-53	ENSG00000279029	AL353583.1
ENSG00000173930	68.6822	-1.20679	0.155124	-7.77952	7.2801e-15	4.63925e-14	ENSG00000173930	SLCO4C1		ENSG00000249690	5.26715	4.40818	0.280079	15.7391	8.16371e-56	1.21064e-53	ENSG00000249690	AC110813.1
ENSG00000214336	49.0435	-1.90367	0.245858	-7.74297	9.71247e-15	6.10942e-14	ENSG00000214336	FOXI3		ENSG00000260555	8.6442	2.23575	0.14213	15.7303	9.37128e-56	1.3833e-53	ENSG00000260555	AC092681.2
ENSG00000204542	67.2373	-1.82593	0.238095	-7.66892	1.73448e-14	1.06465e-13	ENSG00000204542	C6orf15		ENSG00000240132	6.78436	2.4987	0.158847	15.7302	9.38418e-56	1.3833e-53	ENSG00000240132	ETF1P2
ENSG00000139292	117.906	-1.33094	0.173879	-7.65439	1.94226e-14	1.18745e-13	ENSG00000139292	LGR5		ENSG00000261544	3.35756	4.74978	0.301956	15.7301	9.41361e-56	1.38349e-53	ENSG00000261544	AC011939.2
ENSG00000136928	162.769	-2.10353	0.276325	-7.61252	2.68797e-14	1.62201e-13	ENSG00000136928	GABBR2		ENSG00000238246	9.82871	2.60194	0.165435	15.7279	9.74478e-56	1.42366e-53	ENSG00000238246	AC069549.1
ENSG00000006016	502.207	-1.1407	0.149863	-7.61163	2.70662e-14	1.63266e-13	ENSG00000006016	CRLF1		ENSG00000259575	4.81026	3.31104	0.210834	15.7045	1.409e-55	2.04032e-53	ENSG00000259575	AC012404.2
ENSG00000251821	1.36587	-1.24041	0.163589	-7.58245	3.39081e-14	2.0285e-13	ENSG00000251821	RNU6-583P		ENSG00000218757	3.92247	4.78008	0.305122	15.6661	2.57803e-55	3.7113e-53	ENSG00000218757	AL121952.1
ENSG00000167080	193.6	-1.61655	0.213339	-7.57741	3.5251e-14	2.10548e-13	ENSG00000167080	B4GALNT2		ENSG00000259335	2.42395	3.70406	0.236474	15.6637	2.67861e-55	3.83368e-53	ENSG00000259335	HNRNPMP1
ENSG00000095777	63.7395	-1.39886	0.187292	-7.46889	8.08713e-14	4.68205e-13	ENSG00000095777	MYO3A		ENSG00000235945	4.05768	3.67909	0.234975	15.6574	2.95941e-55	4.22329e-53	ENSG00000235945	AC002543.1
ENSG00000077274	600.703	-1.53345	0.208407	-7.35797	1.86733e-13	1.04711e-12	ENSG00000077274	CAPN6		ENSG00000238961	5.02127	3.10921	0.198586	15.6568	2.98736e-55	4.25085e-53	ENSG00000238961	SNORA47
ENSG00000262921	0.889477	-1.38034	0.187797	-7.35019	1.9793e-13	1.1075e-12	ENSG00000262921	AC118754.2		ENSG00000271639	4.75992	3.8655	0.246942	15.6535	3.14671e-55	4.4647e-53	ENSG00000271639	AC019072.1
ENSG00000101292	3.09591	-2.76715	0.378295	-7.31481	2.57741e-13	1.42789e-12	ENSG00000101292	PROKR2		ENSG00000249028	4.11733	3.66156	0.234292	15.6282	4.67798e-55	6.59931e-53	ENSG00000249028	AC004672.1
ENSG00000263513	19.7112	-1.01364	0.138736	-7.30628	2.74632e-13	1.51736e-12	ENSG00000263513	FAM72C		ENSG00000237263	5.25054	3.21088	0.205533	15.6222	5.13837e-55	7.22807e-53	ENSG00000237263	MAPK6PS3
ENSG00000186684	82.6201	-1.30872	0.180353	-7.25641	3.97494e-13	2.16634e-12	ENSG00000186684	CYP27C1		ENSG00000173486	3235.81	1.23073	0.0788593	15.6067	6.55466e-55	9.19408e-53	ENSG00000173486	FKBP2
ENSG00000274569	2.25589	-1.06458	0.14674	-7.2549	4.0197e-13	2.18898e-12	ENSG00000274569	AC024884.1		ENSG00000280321	7.25584	2.92593	0.187547	15.601	7.16375e-55	1.00199e-52	ENSG00000280321	AC129502.1
ENSG00000179059	12.1682	-2.2665	0.31241	-7.25487	4.02049e-13	2.18917e-12	ENSG00000179059	ZFP42		ENSG00000281796	7.2921	2.42975	0.155763	15.599	7.39237e-55	1.03104e-52	ENSG00000281796
ENSG00000255073	1.7777	-1.09331	0.150877	-7.24636	4.28121e-13	2.32445e-12	ENSG00000255073	ZFP91-CNTF		ENSG00000228886	4.30611	2.82029	0.180823	15.597	7.63098e-55	1.06131e-52	ENSG00000228886	AL138963.1
ENSG00000205358	18.8551	-1.37084	0.190366	-7.20105	5.97519e-13	3.2039e-12	ENSG00000205358	MT1H		ENSG00000233072	4.41956	3.19018	0.204555	15.5957	7.78488e-55	1.07966e-52	ENSG00000233072	RPS15AP6
ENSG00000233922	31.2152	-1.30191	0.181646	-7.16728	7.65004e-13	4.05996e-12	ENSG00000233922	LINC01694		ENSG00000224072	12.0038	2.00522	0.128656	15.5859	9.07656e-55	1.24826e-52	ENSG00000224072	AL139811.1
ENSG00000130294	1113.43	-1.75514	0.246151	-7.13032	1.00135e-12	5.25817e-12	ENSG00000130294	KIF1A		ENSG00000226899	3.65388	3.94874	0.253445	15.5803	9.91401e-55	1.35963e-52	ENSG00000226899	AL731577.1
ENSG00000181617	2445.37	-1.99129	0.279917	-7.11384	1.12858e-12	5.89107e-12	ENSG00000181617	FDCSP		ENSG00000264424	17.2146	2.40079	0.154146	15.5748	1.07969e-54	1.47659e-52	ENSG00000264424	MYH4
ENSG00000119283	24.7272	-1.02542	0.144331	-7.10467	1.20607e-12	6.27426e-12	ENSG00000119283	TRIM67		ENSG00000227638	12.7064	2.02142	0.129865	15.5656	1.24767e-54	1.7016e-52	ENSG00000227638	HNRNPA1P14
ENSG00000175697	98.2125	-1.08523	0.152865	-7.09927	1.25415e-12	6.51611e-12	ENSG00000175697	GPR156		ENSG00000246422	4.11204	3.91678	0.251641	15.5649	1.25974e-54	1.71331e-52	ENSG00000246422	AC008781.2
ENSG00000156219	381.145	-1.90759	0.270436	-7.05376	1.7415e-12	8.92951e-12	ENSG00000156219	ART3		ENSG00000228817	12.6109	2.02228	0.129958	15.561	1.33996e-54	1.8174e-52	ENSG00000228817	BACH1-IT2
ENSG00000259362	15.6802	-1.20234	0.170606	-7.04745	1.82229e-12	9.32628e-12	ENSG00000259362	AC046168.1		ENSG00000142046	264.877	1.21728	0.0783662	15.5332	2.06859e-54	2.79794e-52	ENSG00000142046	TMEM91
ENSG00000134824	11685.7	-1.03976	0.1478	-7.03496	1.9932e-12	1.01714e-11	ENSG00000134824	FADS2		ENSG00000229839	14.7083	1.74827	0.112591	15.5277	2.25461e-54	3.04119e-52	ENSG00000229839	AC018462.1
ENSG00000116996	3.91593	-2.22955	0.320742	-6.95122	3.62131e-12	1.80293e-11	ENSG00000116996	ZP4		ENSG00000241560	8.95741	2.60076	0.167498	15.5271	2.27573e-54	3.06129e-52	ENSG00000241560	ZBTB20-AS1
ENSG00000105641	32.7499	-1.24658	0.180536	-6.90488	5.02448e-12	2.46955e-11	ENSG00000105641	SLC5A5		ENSG00000243508	4.20013	4.36036	0.28106	15.514	2.78883e-54	3.74128e-52	ENSG00000243508	AC108688.1
ENSG00000138083	173.409	-1.62074	0.2349	-6.89969	5.21177e-12	2.55752e-11	ENSG00000138083	SIX3		ENSG00000260586	9.43501	3.28318	0.211752	15.5048	3.21788e-54	4.29347e-52	ENSG00000260586	AC064799.2
ENSG00000137261	104.828	-1.23903	0.179788	-6.89161	5.51648e-12	2.70153e-11	ENSG00000137261	KIAA0319		ENSG00000201448	3.21344	2.95965	0.190952	15.4994	3.5006e-54	4.65807e-52	ENSG00000201448	SNORA63C
ENSG00000221887	15.7012	-1.13726	0.165143	-6.88648	5.71879e-12	2.79546e-11	ENSG00000221887	HMSD		ENSG00000239465	2.85129	3.24705	0.209707	15.4838	4.46491e-54	5.92521e-52	ENSG00000239465	AC090543.1
ENSG00000135333	145.85	-1.27029	0.1849	-6.87017	6.41264e-12	3.11945e-11	ENSG00000135333	EPHA7		ENSG00000259964	12.8559	3.23847	0.209204	15.4799	4.74007e-54	6.27345e-52	ENSG00000259964	THSD4-AS1
ENSG00000164076	14.1095	-1.71392	0.250195	-6.85034	7.36767e-12	3.56536e-11	ENSG00000164076	CAMKV		ENSG00000244476	14.8818	2.37652	0.153711	15.461	6.36341e-54	8.39936e-52	ENSG00000244476	ERVFRD-1
ENSG00000184697	35.911	-1.47962	0.216467	-6.8353	8.18339e-12	3.9473e-11	ENSG00000184697	CLDN6		ENSG00000272533	4.68771	3.1513	0.20386	15.4582	6.6477e-54	8.75115e-52	ENSG00000272533	SNORA28
ENSG00000176165	7.74236	-2.09347	0.306281	-6.83515	8.19203e-12	3.9507e-11	ENSG00000176165	FOXG1		ENSG00000133020	16.3254	2.09901	0.135876	15.448	7.7863e-54	1.02227e-51	ENSG00000133020	MYH8
ENSG00000238266	28.5146	-1.77074	0.260385	-6.80045	1.04291e-11	4.97545e-11	ENSG00000238266	LINC00707		ENSG00000257704	689.544	1.1395	0.0737799	15.4445	8.21168e-54	1.07525e-51	ENSG00000257704	INAFM1
ENSG00000124260	5.61304	-3.03903	0.447576	-6.78997	1.12153e-11	5.33503e-11	ENSG00000124260	MAGEA10		ENSG00000279237	3.63172	2.66574	0.172604	15.4443	8.24708e-54	1.07702e-51	ENSG00000279237	AL161773.1
ENSG00000152192	28.3589	-2.25373	0.335742	-6.71269	1.91075e-11	8.8942e-11	ENSG00000152192	POU4F1		ENSG00000125652	1981.39	1.14614	0.0742357	15.4391	8.92714e-54	1.16275e-51	ENSG00000125652	ALKBH7
ENSG00000130487	1178.18	-1.22604	0.182661	-6.7121	1.91843e-11	8.92824e-11	ENSG00000130487	KLHDC7B		ENSG00000130307	149.694	1.19625	0.0775242	15.4307	1.01819e-53	1.32267e-51	ENSG00000130307	USHBP1
ENSG00000255308	1.38455	-1.0719	0.161773	-6.62598	3.44957e-11	1.57008e-10	ENSG00000255308	AC009652.2		ENSG00000261574	5.45421	2.85311	0.185104	15.4135	1.3282e-53	1.70737e-51	ENSG00000261574
ENSG00000163735	63.7154	-1.47159	0.222371	-6.61775	3.64714e-11	1.65634e-10	ENSG00000163735	CXCL5		ENSG00000250069	4.75199	2.65354	0.172196	15.41	1.40173e-53	1.79721e-51	ENSG00000250069	AC011379.1
ENSG00000218565	10.0106	-1.40906	0.213487	-6.6002	4.10605e-11	1.85516e-10	ENSG00000218565	AL592429.1		ENSG00000240869	6.01498	2.75389	0.178881	15.3951	1.76602e-53	2.24672e-51	ENSG00000240869	RN7SL128P
ENSG00000240280	76.9815	-1.59675	0.24278	-6.57692	4.80303e-11	2.1572e-10	ENSG00000240280	TCAM1P		ENSG00000231201	6.20283	2.92235	0.18989	15.3897	1.9186e-53	2.43454e-51	ENSG00000231201	AF127577.2
ENSG00000142224	31.3339	-1.47387	0.225458	-6.53725	6.26593e-11	2.78707e-10	ENSG00000142224	IL19		ENSG00000279021	4.81654	5.05845	0.328848	15.3823	2.15069e-53	2.72203e-51	ENSG00000279021	AC092139.2
ENSG00000187715	37.083	-1.50965	0.231537	-6.5201	7.02599e-11	3.11077e-10	ENSG00000187715	KBTBD12		ENSG00000261336	3.26667	3.38155	0.219845	15.3815	2.17713e-53	2.74843e-51	ENSG00000261336	EIF4BP5
ENSG00000142449	216.762	-1.39245	0.213892	-6.51005	7.51239e-11	3.3145e-10	ENSG00000142449	FBN3		ENSG00000259336	4.34951	2.74824	0.17873	15.3765	2.35452e-53	2.96477e-51	ENSG00000259336	AC021231.1
ENSG00000154975	6.08954	-1.98812	0.30593	-6.49859	8.10745e-11	3.56458e-10	ENSG00000154975	CA10		ENSG00000234718	3.33076	3.01424	0.196058	15.3742	2.43824e-53	3.06236e-51	ENSG00000234718	AC007161.1
ENSG00000121075	19.7655	-1.19259	0.184404	-6.46726	9.97957e-11	4.35348e-10	ENSG00000121075	TBX4		ENSG00000232608	7.7707	2.5216	0.164133	15.3631	2.8932e-53	3.61533e-51	ENSG00000232608	TIMM9P2
ENSG00000203688	65.8804	-1.47178	0.228059	-6.45352	1.09283e-10	4.7476e-10	ENSG00000203688	LINC02487		ENSG00000260194	5.06916	3.69193	0.240481	15.3523	3.41792e-53	4.2602e-51	ENSG00000260194	AC007496.1
ENSG00000229921	10.7198	-1.67724	0.261018	-6.42576	1.31213e-10	5.66183e-10	ENSG00000229921	KIF25-AS1		ENSG00000176978	6784.07	1.06737	0.0695263	15.352	3.43273e-53	4.26785e-51	ENSG00000176978	DPP7
ENSG00000182674	16.7707	-1.22178	0.190322	-6.41952	1.36704e-10	5.88742e-10	ENSG00000182674	KCNB2		ENSG00000251288	5.79018	2.79693	0.182286	15.3436	3.90692e-53	4.84518e-51	ENSG00000251288	AC018797.3
ENSG00000147485	281.863	-1.02775	0.161002	-6.38345	1.73137e-10	7.38925e-10	ENSG00000147485	PXDNL		ENSG00000200783	3.90582	3.72155	0.242618	15.3391	4.18962e-53	5.18271e-51	ENSG00000200783	RN7SKP180
ENSG00000186897	49.7874	-1.3633	0.213822	-6.37586	1.81943e-10	7.74896e-10	ENSG00000186897	C1QL4		ENSG00000240175	4.35941	4.88006	0.318394	15.3271	5.03886e-53	6.21762e-51	ENSG00000240175	MAGI1-AS1
ENSG00000163377	8.02686	-1.49427	0.234854	-6.36255	1.98436e-10	8.41787e-10	ENSG00000163377	FAM19A4		ENSG00000279339	7.65985	2.07353	0.135541	15.2982	7.8656e-53	9.65723e-51	ENSG00000279339	AC100788.2
ENSG00000265646	5.07303	-1.28491	0.202204	-6.35454	2.09049e-10	8.84752e-10	ENSG00000265646	TUFMP1		ENSG00000255321	3.16297	4.67139	0.305455	15.2932	8.48798e-53	1.03955e-50	ENSG00000255321	AC068389.4
ENSG00000168143	399.833	-1.0211	0.161505	-6.32237	2.57579e-10	1.08178e-09	ENSG00000168143	FAM83B		ENSG00000233998	4.49902	3.06604	0.200537	15.2891	9.03767e-53	1.10412e-50	ENSG00000233998	SETP5
ENSG00000198930	28.8544	-1.98766	0.314476	-6.32054	2.60651e-10	1.09421e-09	ENSG00000198930	CSAG1		ENSG00000214773	4.99604	2.78647	0.182315	15.2838	9.80671e-53	1.19511e-50	ENSG00000214773	AC112512.1
ENSG00000259144	7.87975	-1.80013	0.286664	-6.27958	3.39495e-10	1.41172e-09	ENSG00000259144	RANBP20P		ENSG00000270640	16.6482	2.34267	0.153387	15.273	1.15727e-52	1.40338e-50	ENSG00000270640	AC104695.4
ENSG00000135069	1055.16	-1.13183	0.181236	-6.24505	4.23653e-10	1.74428e-09	ENSG00000135069	PSAT1		ENSG00000279235	3.78683	3.26385	0.213825	15.2641	1.32599e-52	1.60403e-50	ENSG00000279235	AC011944.2
ENSG00000185915	17.9961	-1.48406	0.237907	-6.23799	4.43236e-10	1.82278e-09	ENSG00000185915	KLHL34		ENSG00000236256	7.32566	2.31074	0.151393	15.2632	1.34499e-52	1.62302e-50	ENSG00000236256	DIAPH2-AS1
ENSG00000109205	31.0802	-1.65171	0.264959	-6.23383	4.55172e-10	1.87061e-09	ENSG00000109205	ODAM		ENSG00000178021	3.76277	3.56165	0.233415	15.2589	1.43659e-52	1.72931e-50	ENSG00000178021	TSPYL6
ENSG00000272763	21.9955	-1.42099	0.227981	-6.2329	4.57864e-10	1.88121e-09	ENSG00000272763	AC103702.2		ENSG00000267764	6.15983	2.20334	0.144466	15.2516	1.6054e-52	1.91846e-50	ENSG00000267764	AC093567.1
ENSG00000250167	28.2957	-1.41893	0.228054	-6.2219	4.91166e-10	2.01232e-09	ENSG00000250167	AC034206.1		ENSG00000212126	3.43148	3.32924	0.218296	15.251	1.62117e-52	1.93261e-50	ENSG00000212126	TAS2R50
ENSG00000234264	4.00684	-1.02548	0.165334	-6.20246	5.55883e-10	2.26784e-09	ENSG00000234264	DEPDC1-AS1		ENSG00000278893	8.39381	2.38742	0.156601	15.2453	1.76974e-52	2.10462e-50	ENSG00000278893	AC010533.1
ENSG00000279024	6.4064	-1.17474	0.190278	-6.17385	6.66477e-10	2.69846e-09	ENSG00000279024	AC112255.1		ENSG00000167779	607.378	1.49343	0.0979803	15.2421	1.85793e-52	2.20418e-50	ENSG00000167779	IGFBP6
ENSG00000184368	129.034	-1.11288	0.180619	-6.16149	7.20647e-10	2.9098e-09	ENSG00000184368	MAP7D2		ENSG00000279645	3.14865	3.3859	0.222164	15.2405	1.903e-52	2.25222e-50	ENSG00000279645	AC016251.1
ENSG00000133488	23.584	-1.52496	0.250767	-6.08121	1.19282e-09	4.71477e-09	ENSG00000133488	SEC14L4		ENSG00000126861	27.7745	1.74589	0.114634	15.2301	2.23312e-52	2.63658e-50	ENSG00000126861	OMG
ENSG00000110148	46.8444	-1.9336	0.31806	-6.07937	1.20657e-09	4.76645e-09	ENSG00000110148	CCKBR		ENSG00000185031	8.48055	2.71549	0.178349	15.2258	2.38592e-52	2.80354e-50	ENSG00000185031	SLC2A3P2
ENSG00000267466	18.7438	-1.11248	0.183677	-6.05673	1.3892e-09	5.46206e-09	ENSG00000267466	AC021683.1		ENSG00000259883	7.55257	2.03374	0.133629	15.2193	2.63395e-52	3.08761e-50	ENSG00000259883	EHD4-AS1
ENSG00000176076	16.9929	-1.07084	0.177336	-6.03849	1.55566e-09	6.08478e-09	ENSG00000176076	KCNE5		ENSG00000254538	4.8255	3.66116	0.240705	15.2101	3.02987e-52	3.5349e-50	ENSG00000254538	AC027018.1
ENSG00000225595	3.98098	-1.11974	0.185815	-6.02608	1.67984e-09	6.5509e-09	ENSG00000225595	LINC01623		ENSG00000274297	7.14197	2.28492	0.150416	15.1906	4.08031e-52	4.74917e-50	ENSG00000274297	AC009269.5
ENSG00000148798	51.2658	-1.43022	0.238522	-5.99619	2.02004e-09	7.81201e-09	ENSG00000148798	INA		ENSG00000259915	12.3582	1.68504	0.110998	15.1808	4.73686e-52	5.50034e-50	ENSG00000259915	AC017071.1
ENSG00000215397	1.1987	-2.41846	0.406932	-5.94317	2.7957e-09	1.06742e-08	ENSG00000215397	SCRT2		ENSG00000158747	4295.74	1.42834	0.0940965	15.1796	4.82929e-52	5.59447e-50	ENSG00000158747	NBL1
ENSG00000176381	16.8075	-1.28245	0.216235	-5.93081	3.01441e-09	1.14825e-08	ENSG00000176381	PRR18		ENSG00000200354	5.03568	4.70863	0.310249	15.1769	5.02796e-52	5.81095e-50	ENSG00000200354	SNORA71D
ENSG00000004809	15.9459	-1.09603	0.185344	-5.91347	3.34981e-09	1.2711e-08	ENSG00000004809	SLC22A16		ENSG00000252947	4.14944	4.58944	0.302462	15.1736	5.28577e-52	6.09461e-50	ENSG00000252947	SCARNA1
ENSG00000213401	34.1757	-2.67186	0.451835	-5.91335	3.35223e-09	1.27192e-08	ENSG00000213401	MAGEA12		ENSG00000184270	8.43286	2.69696	0.177789	15.1694	5.63609e-52	6.48334e-50	ENSG00000184270	HIST2H2AB
ENSG00000164841	13.6752	-1.07659	0.182207	-5.90862	3.44982e-09	1.30753e-08	ENSG00000164841	TMEM74		ENSG00000182347	4.22033	3.31163	0.218344	15.167	5.84627e-52	6.70944e-50	ENSG00000182347	PDSS1P1
ENSG00000119547	248.933	-1.26138	0.214055	-5.89278	3.7976e-09	1.43328e-08	ENSG00000119547	ONECUT2		ENSG00000253284	13.0191	2.05951	0.135846	15.1606	6.44871e-52	7.36649e-50	ENSG00000253284	AC092828.1
ENSG00000268089	70.4652	-1.34102	0.230327	-5.82224	5.80655e-09	2.15563e-08	ENSG00000268089	GABRQ		ENSG00000261072	3.49404	4.68944	0.309575	15.148	7.81457e-52	8.8855e-50	ENSG00000261072	AC084783.1
ENSG00000277268	9.17091	-2.28088	0.392621	-5.80938	6.27045e-09	2.31983e-08	ENSG00000277268	LHX1-DT		ENSG00000274397	3.22193	4.83995	0.319854	15.1318	9.99829e-52	1.12644e-49	ENSG00000274397	AL357153.4
ENSG00000107807	128.448	-1.61244	0.27819	-5.7962	6.7836e-09	2.50025e-08	ENSG00000107807	TLX1		ENSG00000259644	6.28932	2.42259	0.160223	15.1201	1.19334e-51	1.34139e-49	ENSG00000259644	AC022613.3
ENSG00000226549	3.80194	-1.03018	0.178376	-5.77533	7.68014e-09	2.81865e-08	ENSG00000226549	SCDP1		ENSG00000280205	4.56026	3.80313	0.251608	15.1153	1.28423e-51	1.437e-49	ENSG00000280205	AC009716.2
ENSG00000273760	12.7716	-1.42826	0.24847	-5.74822	9.0187e-09	3.28373e-08	ENSG00000273760	AC245041.1		ENSG00000197882	5.05797	2.92321	0.193451	15.1109	1.37284e-51	1.53266e-49	ENSG00000197882	OR7E13P
ENSG00000196611	2182.03	-1.16957	0.204167	-5.7285	1.01323e-08	3.67237e-08	ENSG00000196611	MMP1		ENSG00000184260	61.7564	1.82344	0.12079	15.096	1.72087e-51	1.91254e-49	ENSG00000184260	HIST2H2AC
ENSG00000186867	20.7187	-1.21925	0.212893	-5.72707	1.02179e-08	3.70148e-08	ENSG00000186867	QRFPR		ENSG00000229800	4.91179	2.70102	0.17893	15.0954	1.7362e-51	1.92523e-49	ENSG00000229800	ATP8A2P2
ENSG00000130829	107.052	-1.17743	0.206451	-5.70317	1.17597e-08	4.23912e-08	ENSG00000130829	DUSP9		ENSG00000279319	17.2238	2.30716	0.152888	15.0905	1.87048e-51	2.06946e-49	ENSG00000279319	AC105074.1
ENSG00000242207	3.62194	-1.52945	0.268291	-5.70072	1.19304e-08	4.29939e-08	ENSG00000242207	HOXB-AS4		ENSG00000186994	216.761	1.35672	0.0899194	15.0882	1.93758e-51	2.13411e-49	ENSG00000186994	KANK3
ENSG00000116329	198.592	-1.00144	0.175958	-5.69139	1.26009e-08	4.53203e-08	ENSG00000116329	OPRD1		ENSG00000212128	4.08154	3.5124	0.232852	15.0843	2.05537e-51	2.2588e-49	ENSG00000212128	TAS2R13
ENSG00000156150	10.4199	-1.41603	0.249557	-5.67419	1.39345e-08	4.98401e-08	ENSG00000156150	ALX3		ENSG00000271811	38.6855	2.2332	0.148058	15.0833	2.08662e-51	2.28804e-49	ENSG00000271811	Z97200.1
ENSG00000236311	10.1591	-1.54406	0.27267	-5.66275	1.48962e-08	5.3122e-08	ENSG00000236311	TLX1NB		ENSG00000077080	7.11909	3.56634	0.236537	15.0773	2.28426e-51	2.49918e-49	ENSG00000077080	ACTL6B
ENSG00000164434	640.838	-1.63339	0.288708	-5.65759	1.5351e-08	5.46488e-08	ENSG00000164434	FABP7		ENSG00000278909	3.38071	3.33307	0.221232	15.0659	2.71358e-51	2.95576e-49	ENSG00000278909	AC007608.4
ENSG00000142700	7.91243	-1.49389	0.265765	-5.6211	1.89748e-08	6.70208e-08	ENSG00000142700	DMRTA2		ENSG00000274978	2.55697	3.03628	0.20156	15.0639	2.79872e-51	3.03507e-49	ENSG00000274978	RNU11
ENSG00000259374	28.4049	-1.46613	0.26172	-5.60191	2.12003e-08	7.44542e-08	ENSG00000259374	NDUFB4P11		ENSG00000255823	45.0599	1.67464	0.111176	15.0629	2.83855e-51	3.0715e-49	ENSG00000255823	MTRNR2L8
ENSG00000198729	609.338	-1.15433	0.207701	-5.55766	2.7341e-08	9.50439e-08	ENSG00000198729	PPP1R14C		ENSG00000220392	3.16577	3.31966	0.220443	15.059	3.01197e-51	3.24489e-49	ENSG00000220392	FCF1P5
ENSG00000137090	10.259	-1.6763	0.301693	-5.55632	2.75527e-08	9.57326e-08	ENSG00000137090	DMRT1		ENSG00000142694	1576.93	1.68779	0.112128	15.0524	3.3299e-51	3.57956e-49	ENSG00000142694	EVA1B
ENSG00000167634	21.798	-1.03368	0.186081	-5.55504	2.77555e-08	9.64098e-08	ENSG00000167634	NLRP7		ENSG00000275850	3.5585	3.20862	0.213321	15.0412	3.94092e-51	4.22718e-49	ENSG00000275850	AC005912.2
ENSG00000226080	44.5759	-1.3759	0.247824	-5.55194	2.82522e-08	9.80728e-08	ENSG00000226080	AC062028.2		ENSG00000255350	3.31108	3.46013	0.230081	15.0388	4.09198e-51	4.37966e-49	ENSG00000255350	MTCO1P15
ENSG00000120289	13.7032	-2.08367	0.376549	-5.5336	3.13731e-08	1.0841e-07	ENSG00000120289	MAGEB4		ENSG00000203325	8.43722	1.94849	0.129677	15.0257	4.98339e-51	5.31066e-49	ENSG00000203325	AL445248.1
ENSG00000185352	779.29	-1.05849	0.191825	-5.518	3.42873e-08	1.18033e-07	ENSG00000185352	HS6ST3		ENSG00000223450	3.27696	4.16139	0.277031	15.0214	5.31912e-51	5.644e-49	ENSG00000223450	AL590632.1
ENSG00000104321	287.396	-1.17224	0.212545	-5.51525	3.48281e-08	1.19785e-07	ENSG00000104321	TRPA1		ENSG00000200816	4.06284	3.96858	0.264309	15.0149	5.86615e-51	6.19772e-49	ENSG00000200816	SNORA38
ENSG00000135374	2317.31	-1.22343	0.222109	-5.50825	3.62424e-08	1.24424e-07	ENSG00000135374	ELF5		ENSG00000187762	3.701	3.09647	0.206351	15.0058	6.72257e-51	7.08735e-49	ENSG00000187762	HSPE1P11
ENSG00000180438	79.5158	-1.0121	0.184146	-5.49618	3.88108e-08	1.3288e-07	ENSG00000180438	TPRXL		ENSG00000236549	4.56043	4.4347	0.29562	15.0013	7.1964e-51	7.57068e-49	ENSG00000236549	RPS27AP7
ENSG00000105255	48.1193	-1.0125	0.186044	-5.44226	5.26094e-08	1.77701e-07	ENSG00000105255	FSD1		ENSG00000237738	2.77796	3.07172	0.204829	14.9965	7.73511e-51	8.12005e-49	ENSG00000237738	RNF216-IT1
ENSG00000253266	4.75767	-1.06658	0.196382	-5.43115	5.59933e-08	1.88717e-07	ENSG00000253266	AC100860.1		ENSG00000235440	4.23789	2.72732	0.181919	14.9919	8.29154e-51	8.68565e-49	ENSG00000235440	AC011742.3
ENSG00000253824	7.15076	-1.12057	0.207982	-5.38781	7.13219e-08	2.37727e-07	ENSG00000253824	AP003472.1		ENSG00000266696	3.76025	3.39082	0.226256	14.9867	8.97543e-51	9.38208e-49	ENSG00000266696	AC044840.1
ENSG00000144290	59.9695	-1.13127	0.211734	-5.34288	9.14802e-08	3.0159e-07	ENSG00000144290	SLC4A10		ENSG00000254440	6.70624	2.85562	0.190602	14.9821	9.61119e-51	1.00254e-48	ENSG00000254440	PBOV1
ENSG00000230524	7.14675	-1.10102	0.206563	-5.3302	9.81037e-08	3.22799e-07	ENSG00000230524	COL6A4P1		ENSG00000242860	4.27904	2.97188	0.19838	14.9807	9.81364e-51	1.02149e-48	ENSG00000242860	RN7SL180P
ENSG00000075388	1.20851	-2.59895	0.488282	-5.32264	1.02269e-07	3.35899e-07	ENSG00000075388	FGF4		ENSG00000260744	3.52749	3.48003	0.232421	14.973	1.10291e-50	1.14559e-48	ENSG00000260744	AC007494.2
ENSG00000112280	37.8633	-1.29492	0.243303	-5.32226	1.02485e-07	3.36585e-07	ENSG00000112280	COL9A1		ENSG00000278408	3.57754	3.90948	0.261129	14.9715	1.12799e-50	1.16917e-48	ENSG00000278408	AC108861.1
ENSG00000248586	0.964981	-1.63728	0.308163	-5.31305	1.07808e-07	3.52985e-07	ENSG00000248586	AC025470.1		ENSG00000104903	255.873	1.22229	0.0816597	14.968	1.18759e-50	1.22836e-48	ENSG00000104903	LYL1
ENSG00000203972	6.54059	-2.91659	0.552246	-5.28131	1.28261e-07	4.1682e-07	ENSG00000203972	GLYATL3		ENSG00000281469	7.85406	1.8431	0.123224	14.9573	1.39665e-50	1.44156e-48	ENSG00000281469	AC019226.1
ENSG00000158748	8.01008	-1.02416	0.195125	-5.24872	1.5316e-07	4.93952e-07	ENSG00000158748	HTR6		ENSG00000199477	11.2432	1.68751	0.112946	14.9408	1.78745e-50	1.83723e-48	ENSG00000199477	SNORA31
ENSG00000253868	1.65155	-1.84623	0.354375	-5.20983	1.89011e-07	6.0376e-07	ENSG00000253868	FER1L6-AS2		ENSG00000185614	115.12	1.22831	0.0822164	14.94	1.80898e-50	1.85549e-48	ENSG00000185614	FAM212A
ENSG00000265804	1.04318	-1.43509	0.276036	-5.19892	2.00448e-07	6.38514e-07	ENSG00000265804			ENSG00000226148	4.60767	3.42907	0.229803	14.9218	2.37851e-50	2.42954e-48	ENSG00000226148	SLC25A39P1
ENSG00000277764	4.52317	-1.20022	0.230924	-5.19746	2.02027e-07	6.43334e-07	ENSG00000277764	RF02272		ENSG00000237853	4.20185	3.21189	0.215264	14.9207	2.41686e-50	2.4636e-48	ENSG00000237853	NFIA-AS1
ENSG00000254717	13.7959	-1.0836	0.2091	-5.18223	2.19253e-07	6.95624e-07	ENSG00000254717	GLYATL1P2		ENSG00000275811	2.85332	4.11991	0.276247	14.9139	2.677e-50	2.72312e-48	ENSG00000275811	HTR1DP1
ENSG00000268654	10.9747	-1.24415	0.242525	-5.12997	2.89785e-07	9.0834e-07	ENSG00000268654	MIMT1		ENSG00000277840	9.83272	1.77381	0.119059	14.8986	3.36732e-50	3.41828e-48	ENSG00000277840	AC026368.1
ENSG00000256937	2.64119	-1.14951	0.225271	-5.10278	3.34706e-07	1.04145e-06	ENSG00000256937	KRT17P8		ENSG00000270140	3.00717	2.91009	0.195376	14.8948	3.56173e-50	3.6082e-48	ENSG00000270140	AC005520.3
ENSG00000228626	9.71893	-1.17926	0.231448	-5.09512	3.48525e-07	1.08199e-06	ENSG00000228626	AC245100.3		ENSG00000115268	15344.2	1.02201	0.0686207	14.8936	3.62656e-50	3.66633e-48	ENSG00000115268	RPS15
ENSG00000235994	4.05037	-1.20804	0.237101	-5.09503	3.48688e-07	1.08243e-06	ENSG00000235994	HGC6.3		ENSG00000229623	3.73566	5.32169	0.357342	14.8925	3.68983e-50	3.72265e-48	ENSG00000229623	METTL21AP1
ENSG00000274209	17.0559	-1.18275	0.232528	-5.08649	3.64757e-07	1.13024e-06	ENSG00000274209	ANTXRL		ENSG00000235937	3.10186	2.93455	0.1973	14.8735	4.89487e-50	4.9283e-48	ENSG00000235937	AC008280.1
ENSG00000265009	1.07522	-1.38939	0.273212	-5.08539	3.66871e-07	1.13644e-06	ENSG00000265009			ENSG00000228196	3.43922	2.98681	0.200816	14.8734	4.90761e-50	4.93105e-48	ENSG00000228196	PTPN2P1
ENSG00000246528	7.89506	-1.00181	0.197952	-5.06087	4.17353e-07	1.28417e-06	ENSG00000246528	AC079089.1		ENSG00000244229	3.45924	3.14585	0.211514	14.873	4.93391e-50	4.94737e-48	ENSG00000244229	RPL26P35
ENSG00000254626	7.81733	-2.00605	0.396602	-5.05809	4.23468e-07	1.30184e-06	ENSG00000254626	AP003100.1		ENSG00000228663	22.4833	2.06882	0.139161	14.8664	5.44755e-50	5.45131e-48	ENSG00000228663	PSMD10P1
ENSG00000236069	13.1332	-1.23028	0.243384	-5.05491	4.30592e-07	1.32226e-06	ENSG00000236069	AL136987.1		ENSG00000171951	213.689	1.93302	0.130039	14.8649	5.56909e-50	5.56163e-48	ENSG00000171951	SCG2
ENSG00000254416	6.6173	-1.73798	0.344324	-5.0475	4.47627e-07	1.37243e-06	ENSG00000254416	AP000924.1		ENSG00000279038	16.2349	1.92875	0.129823	14.8568	6.28627e-50	6.26515e-48	ENSG00000279038
ENSG00000263745	7.51998	-1.01511	0.201583	-5.03569	4.76138e-07	1.45694e-06	ENSG00000263745	AP005230.1		ENSG00000116882	14.0206	2.86688	0.193015	14.8531	6.64163e-50	6.60594e-48	ENSG00000116882	HAO2
ENSG00000221844	1.10299	-1.92236	0.383372	-5.01433	5.32173e-07	1.62045e-06	ENSG00000221844	DPP3P2		ENSG00000244384	3.79644	3.36597	0.226635	14.8519	6.75888e-50	6.70901e-48	ENSG00000244384	RN7SL359P
ENSG00000019169	399.026	-1.00783	0.201577	-4.99975	5.7406e-07	1.7411e-06	ENSG00000019169	MARCO		ENSG00000248222	4.28761	3.66109	0.246583	14.8473	7.24108e-50	7.17318e-48	ENSG00000248222	AC011389.1
ENSG00000010438	27.5689	-1.03826	0.208933	-4.96932	6.71867e-07	2.02452e-06	ENSG00000010438	PRSS3		ENSG00000259735	2.60854	4.05096	0.272958	14.841	7.95894e-50	7.85271e-48	ENSG00000259735	AC092868.2
ENSG00000204655	7.62664	-1.41396	0.285287	-4.95627	7.18604e-07	2.15875e-06	ENSG00000204655	MOG		ENSG00000225442	4.02371	2.79551	0.188396	14.8385	8.26164e-50	8.13507e-48	ENSG00000225442	MPRIP-AS1
ENSG00000101425	116.183	-1.04291	0.210631	-4.95139	7.36842e-07	2.21057e-06	ENSG00000101425	BPI		ENSG00000199568	7.501	3.94381	0.265918	14.8309	9.24271e-50	9.06486e-48	ENSG00000199568	RNU5A-1
ENSG00000205325	19.7449	-1.53647	0.310828	-4.94314	7.68743e-07	2.30151e-06	ENSG00000205325	AC005863.1		ENSG00000260417	7.15867	2.66593	0.17978	14.8288	9.54089e-50	9.3387e-48	ENSG00000260417	AC092127.1
ENSG00000225194	29.7549	-1.00752	0.205256	-4.90862	9.17197e-07	2.72672e-06	ENSG00000225194	LINC00092		ENSG00000225017	4.19911	4.06555	0.274192	14.8274	9.74813e-50	9.52261e-48	ENSG00000225017	AP004289.1
ENSG00000248538	35.7155	-1.25847	0.258454	-4.86921	1.12045e-06	3.2995e-06	ENSG00000248538	AC022784.1		ENSG00000266371	4.18225	3.1127	0.209938	14.8268	9.8327e-50	9.58621e-48	ENSG00000266371	AC079915.1
ENSG00000230450	1.39253	-1.02047	0.210097	-4.85711	1.1911e-06	3.50108e-06	ENSG00000230450	NEK2P4		ENSG00000243986	3.22034	4.83733	0.326279	14.8258	9.98501e-50	9.71545e-48	ENSG00000243986	ENO1P3
ENSG00000130383	1.33938	-1.46315	0.301897	-4.84651	1.25651e-06	3.68408e-06	ENSG00000130383	FUT5		ENSG00000272367	29.7906	1.27489	0.086022	14.8206	1.07885e-49	1.04766e-47	ENSG00000272367
ENSG00000245526	28.9262	-1.2918	0.266856	-4.84081	1.29312e-06	3.78578e-06	ENSG00000245526	LINC00461		ENSG00000165995	274.241	2.039	0.137649	14.813	1.20672e-49	1.16722e-47	ENSG00000165995	CACNB2
ENSG00000178248	9.53444	-1.05231	0.218157	-4.82362	1.40975e-06	4.11255e-06	ENSG00000178248	LINC01658		ENSG00000272918	57.1582	1.39377	0.0940945	14.8124	1.21794e-49	1.17576e-47	ENSG00000272918	AC005070.3
ENSG00000094755	9777.95	-1.14061	0.237359	-4.8054	1.54442e-06	4.48708e-06	ENSG00000094755	GABRP		ENSG00000266998	12.095	2.50114	0.168969	14.8024	1.41382e-49	1.35953e-47	ENSG00000266998	AC111182.1
ENSG00000204710	172.714	-1.43837	0.299884	-4.79644	1.61509e-06	4.68437e-06	ENSG00000204710	SPDYC		ENSG00000218428	3.70221	3.69872	0.249886	14.8016	1.43018e-49	1.37258e-47	ENSG00000218428	NIP7P3
ENSG00000269416	84.3419	-1.023	0.213938	-4.78174	1.73785e-06	5.0215e-06	ENSG00000269416	LINC01224		ENSG00000273797	5.68271	1.93518	0.130756	14.7999	1.46633e-49	1.40454e-47	ENSG00000273797	AL133445.2
ENSG00000179869	118.228	-1.18288	0.24802	-4.76929	1.84875e-06	5.32725e-06	ENSG00000179869	ABCA13		ENSG00000258044	4.19219	2.7454	0.185565	14.7948	1.5821e-49	1.51248e-47	ENSG00000258044	AC073569.1
ENSG00000077279	153.239	-1.15498	0.242708	-4.75872	1.94825e-06	5.59823e-06	ENSG00000077279	DCX		ENSG00000226746	6.10435	2.55814	0.172946	14.7916	1.65959e-49	1.58349e-47	ENSG00000226746	SMCR5
ENSG00000101180	6.01197	-1.14487	0.241459	-4.74145	2.12199e-06	6.07125e-06	ENSG00000101180	HRH3		ENSG00000278896	5.80549	2.4008	0.162587	14.7662	2.41954e-49	2.29968e-47	ENSG00000278896	AC025031.5
ENSG00000103355	34.9694	-1.67322	0.354581	-4.71886	2.37172e-06	6.74733e-06	ENSG00000103355	PRSS33		ENSG00000279801	23.6455	1.86994	0.126722	14.7562	2.80811e-49	2.64855e-47	ENSG00000279801	AC111170.3
ENSG00000174502	48.48	-1.05418	0.225135	-4.68242	2.83505e-06	8.00212e-06	ENSG00000174502	SLC26A9		ENSG00000134551	6.46971	2.29696	0.155667	14.7556	2.8318e-49	2.66579e-47	ENSG00000134551	PRH2
ENSG00000243064	250.215	-1.33372	0.285664	-4.66884	3.02903e-06	8.51786e-06	ENSG00000243064	ABCC13		ENSG00000179038	6.48544	2.64213	0.179139	14.7491	3.11976e-49	2.92568e-47	ENSG00000179038	AP001885.1
ENSG00000141639	227.488	-1.11482	0.239984	-4.64538	3.3945e-06	9.49412e-06	ENSG00000141639	MAPK4		ENSG00000225572	4.25021	3.83545	0.260117	14.7451	3.30913e-49	3.09737e-47	ENSG00000225572	DOCK4-AS1
ENSG00000263082	6.89077	-1.38818	0.302104	-4.59504	4.3266e-06	1.19672e-05	ENSG00000263082			ENSG00000271716	2.71107	3.31736	0.225243	14.7279	4.26628e-49	3.97815e-47	ENSG00000271716	AC022001.2
ENSG00000140522	7.81439	-1.26521	0.276664	-4.5731	4.80558e-06	1.32185e-05	ENSG00000140522	RLBP1		ENSG00000213041	2.56116	2.88257	0.195737	14.7268	4.33894e-49	4.03825e-47	ENSG00000213041	AC093422.1
ENSG00000173237	14.2151	-1.61284	0.354442	-4.55035	5.35555e-06	1.46502e-05	ENSG00000173237	C11orf86		ENSG00000201176	3.72716	2.54793	0.173076	14.7214	4.69691e-49	4.36316e-47	ENSG00000201176	RNU6-853P
ENSG00000140600	22.7299	-1.11337	0.244793	-4.54822	5.41023e-06	1.47957e-05	ENSG00000140600	SH3GL3		ENSG00000199347	5.98576	3.93329	0.26749	14.7045	6.03532e-49	5.59591e-47	ENSG00000199347	RNU5E-1
ENSG00000136535	6.16418	-1.18835	0.261782	-4.53947	5.63951e-06	1.5386e-05	ENSG00000136535	TBR1		ENSG00000208892	3.92036	4.35833	0.296509	14.6988	6.55823e-49	6.06932e-47	ENSG00000208892	SNORA49
ENSG00000102243	592.502	-1.24617	0.274855	-4.53393	5.7895e-06	1.57742e-05	ENSG00000102243	VGLL1		ENSG00000277539	4.10258	3.84224	0.26142	14.6976	6.67825e-49	6.16879e-47	ENSG00000277539	AC138058.1
ENSG00000253196	6.53511	-1.0572	0.234016	-4.51764	6.25317e-06	1.69699e-05	ENSG00000253196	AC083841.1		ENSG00000235159	19.8417	1.63128	0.110996	14.6967	6.76951e-49	6.24139e-47	ENSG00000235159	AL121672.2
ENSG00000167755	970.628	-1.14814	0.254815	-4.50578	6.61294e-06	1.7896e-05	ENSG00000167755	KLK6		ENSG00000161835	387.619	1.18078	0.0803773	14.6905	7.42101e-49	6.82927e-47	ENSG00000161835	GRASP
ENSG00000189182	11.186	-1.5006	0.333128	-4.50458	6.6505e-06	1.79937e-05	ENSG00000189182	KRT77		ENSG00000226958	33.3941	2.10003	0.142979	14.6877	7.72698e-49	7.09758e-47	ENSG00000226958
ENSG00000225899	1.11317	-1.69385	0.378106	-4.47981	7.47078e-06	2.00971e-05	ENSG00000225899	FRG2B		ENSG00000273489	8.29968	1.66145	0.113121	14.6874	7.76518e-49	7.11938e-47	ENSG00000273489	AC008264.2
ENSG00000112238	8.31788	-1.99498	0.445499	-4.47809	7.53153e-06	2.02505e-05	ENSG00000112238	PRDM13		ENSG00000272320	30.5634	1.76554	0.120213	14.6868	7.83803e-49	7.17282e-47	ENSG00000272320	AL445309.1
ENSG00000225107	8.84365	-1.1311	0.256531	-4.40922	1.03744e-05	2.74506e-05	ENSG00000225107	AC092484.1		ENSG00000280365	3.29983	4.54671	0.30976	14.6782	8.89811e-49	8.09777e-47	ENSG00000280365	AC021766.1
ENSG00000082556	42.4903	-1.22178	0.278621	-4.38511	1.15926e-05	3.05134e-05	ENSG00000082556	OPRK1		ENSG00000242882	3.13817	2.39384	0.163158	14.6719	9.76413e-49	8.8695e-47	ENSG00000242882	RPL5P11
ENSG00000071991	93.1312	-1.36384	0.311128	-4.38352	1.16777e-05	3.0729e-05	ENSG00000071991	CDH19		ENSG00000271840	7.09987	1.93051	0.131659	14.6629	1.11353e-48	1.00778e-46	ENSG00000271840	AL031281.2
ENSG00000166535	906.111	-1.0629	0.243366	-4.3675	1.25678e-05	3.29551e-05	ENSG00000166535	A2ML1		ENSG00000237646	3.15735	3.12039	0.212856	14.6596	1.16904e-48	1.05608e-46	ENSG00000237646	HLCS-IT1
ENSG00000241439	2.57352	-1.50474	0.346128	-4.34735	1.37794e-05	3.59426e-05	ENSG00000241439	AC092903.1		ENSG00000237705	5.91649	2.67124	0.182222	14.6593	1.17494e-48	1.05947e-46	ENSG00000237705	AC008937.2
ENSG00000221867	223.924	-2.51304	0.578729	-4.34235	1.40969e-05	3.67298e-05	ENSG00000221867	MAGEA3		ENSG00000228073	2.46404	4.81089	0.328201	14.6584	1.19124e-48	1.0722e-46	ENSG00000228073	AC133106.1
ENSG00000108688	36.9076	-1.00641	0.232189	-4.33444	1.46129e-05	3.80219e-05	ENSG00000108688	CCL7		ENSG00000242950	18.1927	2.36068	0.161093	14.6542	1.2668e-48	1.13813e-46	ENSG00000242950	ERVW-1
ENSG00000263711	4.98631	-1.27693	0.296978	-4.29973	1.71003e-05	4.41255e-05	ENSG00000263711	AC079062.1		ENSG00000241985	4.61621	2.53351	0.172889	14.6539	1.2712e-48	1.14e-46	ENSG00000241985	WWTR1-IT1
ENSG00000214429	6.03572	-1.44509	0.338682	-4.2668	1.98295e-05	5.08084e-05	ENSG00000214429	CYCSP6		ENSG00000244073	19.6177	1.26431	0.0862874	14.6523	1.30272e-48	1.16615e-46	ENSG00000244073	RPS4XP6
ENSG00000164532	17.1083	-1.21943	0.287083	-4.24767	2.16007e-05	5.51459e-05	ENSG00000164532	TBX20		ENSG00000254556	3.38428	4.30878	0.294098	14.6508	1.33044e-48	1.1888e-46	ENSG00000254556	AF131215.2
ENSG00000130433	71.0884	-1.27546	0.300678	-4.24194	2.21596e-05	5.64848e-05	ENSG00000130433	CACNG6		ENSG00000230068	4.59642	2.46705	0.168465	14.6443	1.46519e-48	1.30683e-46	ENSG00000230068	CDC42-IT1
ENSG00000258927	1.99184	-1.50933	0.356206	-4.23725	2.26276e-05	5.76324e-05	ENSG00000258927	AL133467.2		ENSG00000255141	2.57379	4.02678	0.275015	14.642	1.51448e-48	1.34592e-46	ENSG00000255141	HNRNPA1P76
ENSG00000233365	2.2128	-1.17747	0.280771	-4.19371	2.74424e-05	6.91985e-05	ENSG00000233365	AL121956.1		ENSG00000216921	28.3894	2.31311	0.157986	14.6412	1.53294e-48	1.35743e-46	ENSG00000216921	AC131097.2
ENSG00000197172	105.471	-2.47473	0.592729	-4.17514	2.97799e-05	7.47367e-05	ENSG00000197172	MAGEA6		ENSG00000260034	23.1505	2.04646	0.139774	14.6412	1.53241e-48	1.35743e-46	ENSG00000260034	LCMT1-AS2
ENSG00000105550	2.88921	-1.85836	0.447133	-4.15616	3.23635e-05	8.08865e-05	ENSG00000105550	FGF21		ENSG00000234779	10.7669	1.88554	0.128791	14.6403	1.55389e-48	1.3735e-46	ENSG00000234779	BNC2-AS1
ENSG00000181355	12.7716	-1.43355	0.345193	-4.1529	3.28294e-05	8.19928e-05	ENSG00000181355	OFCC1		ENSG00000258399	6.39686	2.34816	0.160406	14.6389	1.58669e-48	1.39998e-46	ENSG00000258399	AL117190.1
ENSG00000187772	6.40757	-2.09999	0.514496	-4.08165	4.47173e-05	0.000110037	ENSG00000187772	LIN28B		ENSG00000270124	6.26394	2.63631	0.180147	14.6343	1.69831e-48	1.49578e-46	ENSG00000270124	AC092127.2
ENSG00000214107	10.0109	-1.9208	0.473368	-4.05772	4.95544e-05	0.000121309	ENSG00000214107	MAGEB1		ENSG00000171443	822.133	1.0534	0.0720225	14.6259	1.91934e-48	1.68744e-46	ENSG00000171443	ZNF524
ENSG00000188100	24.2997	-1.30601	0.322156	-4.05397	5.03565e-05	0.00012318	ENSG00000188100	FAM25A		ENSG00000175604	4.00431	2.68239	0.183414	14.6247	1.95312e-48	1.71408e-46	ENSG00000175604	AC007601.1
ENSG00000230778	0.744683	-1.15525	0.285153	-4.05132	5.093e-05	0.000124521	ENSG00000230778	ANKRD63		ENSG00000250116	19.8736	1.87865	0.128508	14.619	2.12521e-48	1.85518e-46	ENSG00000250116	AC018682.1
ENSG00000234493	9.65768	-1.37834	0.342038	-4.0298	5.58245e-05	0.00013574	ENSG00000234493	RHOXF1P1		ENSG00000239686	2.83656	4.50869	0.308542	14.6129	2.3238e-48	2.02495e-46	ENSG00000239686	AL158801.1
ENSG00000229544	78.5914	-1.22921	0.306901	-4.00523	6.19561e-05	0.000149865	ENSG00000229544	NKX1-2		ENSG00000279978	473.249	1.4088	0.096432	14.6092	2.45224e-48	2.1331e-46	ENSG00000279978
ENSG00000261175	425.251	-1.02375	0.255728	-4.00327	6.24726e-05	0.000151025	ENSG00000261175	LINC02188		ENSG00000251687	3.05707	3.18507	0.218035	14.608	2.49584e-48	2.16339e-46	ENSG00000251687	AC104791.1
ENSG00000260548	0.782397	-2.80965	0.709601	-3.95947	7.51154e-05	0.000179884	ENSG00000260548	AL035425.2		ENSG00000228212	4.52323	2.45854	0.168398	14.5996	2.82493e-48	2.44004e-46	ENSG00000228212	OFD1P17
ENSG00000271573	1.02775	-1.57561	0.399466	-3.9443	8.00332e-05	0.000190973	ENSG00000271573	AL136982.5		ENSG00000235776	52.4724	1.2284	0.0841634	14.5954	3.00516e-48	2.58665e-46	ENSG00000235776	AC000089.1
ENSG00000139800	37.76	-1.39779	0.356881	-3.91668	8.97763e-05	0.000212953	ENSG00000139800	ZIC5		ENSG00000272368	54.3981	1.10842	0.0759492	14.5943	3.05499e-48	2.62495e-46	ENSG00000272368	AC074032.1
ENSG00000188816	11.3181	-1.18544	0.302751	-3.91556	9.01931e-05	0.0002139	ENSG00000188816	HMX2		ENSG00000107872	622.799	1.17406	0.0804549	14.5927	3.12399e-48	2.67955e-46	ENSG00000107872	FBXL15
ENSG00000164458	1.64657	-1.68559	0.432459	-3.89768	9.7118e-05	0.000229362	ENSG00000164458	TBXT		ENSG00000244642	4.73067	3.17077	0.217303	14.5915	3.18113e-48	2.72382e-46	ENSG00000244642	RN7SL396P
ENSG00000204613	2.43743	-1.11302	0.287451	-3.87202	0.000107935	0.00025368	ENSG00000204613	TRIM10		ENSG00000227409	3.96692	2.25022	0.154296	14.5838	3.56173e-48	3.04442e-46	ENSG00000227409	ZMYM4-AS1
ENSG00000141668	683.886	-1.02165	0.270029	-3.7835	0.000154637	0.000356699	ENSG00000141668	CBLN2		ENSG00000279591	7.27806	2.23224	0.153098	14.5805	3.73883e-48	3.18473e-46	ENSG00000279591	AC002044.2
ENSG00000213231	6.50579	-1.28259	0.339489	-3.778	0.000158091	0.000364394	ENSG00000213231	TCL1B		ENSG00000215867	3.27566	2.82868	0.194067	14.5758	4.00473e-48	3.40534e-46	ENSG00000215867	KRT18P57
ENSG00000232598	3.20553	-1.45322	0.390047	-3.72576	0.000194731	0.000443964	ENSG00000232598	AL122034.1		ENSG00000241641	4.66994	2.41341	0.165712	14.5639	4.76804e-48	4.0335e-46	ENSG00000241641	RPS23P6
ENSG00000181433	3.19612	-1.03872	0.280378	-3.70472	0.000211624	0.000480209	ENSG00000181433	SAGE1		ENSG00000250280	2.9567	3.72996	0.256123	14.5631	4.81931e-48	4.06987e-46	ENSG00000250280	AC026124.1
ENSG00000196350	18.0074	-1.11168	0.300852	-3.6951	0.000219799	0.000497682	ENSG00000196350	ZNF729		ENSG00000105472	1037.83	1.41728	0.0973844	14.5534	5.5531e-48	4.68153e-46	ENSG00000105472	CLEC11A
ENSG00000136695	12.661	-1.02491	0.278115	-3.68521	0.000228511	0.000516172	ENSG00000136695	IL36RN		ENSG00000280042	11.8338	2.26466	0.155676	14.5473	6.07193e-48	5.11018e-46	ENSG00000280042	AC022336.3
ENSG00000204983	17.6426	-1.03743	0.282859	-3.66766	0.00024478	0.000550247	ENSG00000204983	PRSS1		ENSG00000255220	3.1943	3.59291	0.247007	14.5458	6.21264e-48	5.21078e-46	ENSG00000255220	DDX18P5
ENSG00000275312	1.11498	-1.15764	0.316172	-3.66144	0.000250806	0.000563251	ENSG00000275312	AL512324.1		ENSG00000267934	102.222	1.81583	0.124871	14.5417	6.5964e-48	5.52325e-46	ENSG00000267934	AC010300.1
ENSG00000259094	4.83264	-1.59742	0.437695	-3.64961	0.000262641	0.0005879	ENSG00000259094	AC013457.1		ENSG00000275488	3.84235	3.46273	0.238215	14.5362	7.14603e-48	5.9733e-46	ENSG00000275488	AC023509.5
ENSG00000171360	2.01024	-1.21974	0.336324	-3.62669	0.000287076	0.000639196	ENSG00000171360	KRT38		ENSG00000232915	2.98641	3.97871	0.273726	14.5354	7.23282e-48	6.03561e-46	ENSG00000232915	AC097721.1
ENSG00000183674	19.9893	-1.21298	0.334783	-3.62317	0.000291013	0.000647551	ENSG00000183674	LINC00518		ENSG00000270986	2.63182	3.93874	0.271053	14.5313	7.67757e-48	6.3959e-46	ENSG00000270986	HMGB1P51
ENSG00000133863	16.6895	-1.23231	0.341629	-3.60714	0.000309585	0.000686457	ENSG00000133863	TEX15		ENSG00000257957	3.95502	3.12126	0.214879	14.5257	8.32975e-48	6.92748e-46	ENSG00000257957	QRSL1P3
ENSG00000210741	0.596864	-1.90849	0.53313	-3.57979	0.000343868	0.000757868	ENSG00000210741	MIR196A1		ENSG00000242087	2.25823	4.21608	0.290376	14.5194	9.1371e-48	7.58611e-46	ENSG00000242087	RPL36AP41
ENSG00000230834	4.41413	-1.04902	0.293363	-3.57583	0.000349116	0.000768607	ENSG00000230834	AC068580.2		ENSG00000260872	66.629	1.54751	0.1066	14.517	9.45375e-48	7.83579e-46	ENSG00000260872
ENSG00000123576	1.98222	-1.9378	0.542667	-3.57087	0.000355794	0.000782261	ENSG00000123576	ESX1		ENSG00000236018	4.38489	2.68325	0.184924	14.5101	1.04631e-47	8.65779e-46	ENSG00000236018	AC004898.1
ENSG00000235643	1.35699	-1.16448	0.327282	-3.55802	0.000373656	0.000818791	ENSG00000235643	LINC01647		ENSG00000210140	24.2954	1.56039	0.107551	14.5084	1.07239e-47	8.85876e-46	ENSG00000210140	MT-TC
ENSG00000223784	11.9382	-1.15457	0.325016	-3.55234	0.000381819	0.000835526	ENSG00000223784	LINP1		ENSG00000213176	2.45565	2.74109	0.188955	14.5066	1.10044e-47	9.07518e-46	ENSG00000213176	RPL13P6
ENSG00000280916	43.2282	-1.11035	0.313368	-3.5433	0.00039516	0.000863307	ENSG00000280916	FOXCUT		ENSG00000278979	4.00735	2.55146	0.175911	14.5043	1.13774e-47	9.36711e-46	ENSG00000278979	AC007598.3
ENSG00000280151	1.53127	-1.48698	0.422591	-3.51874	0.000433607	0.0009424	ENSG00000280151			ENSG00000233821	2.92965	3.32921	0.229559	14.5027	1.16554e-47	9.58e-46	ENSG00000233821	ENOX1-AS1
ENSG00000248846	2.87393	-1.00154	0.285322	-3.51021	0.000447749	0.00097095	ENSG00000248846	LINC02065		ENSG00000225767	4.93342	3.26618	0.22535	14.4938	1.32533e-47	1.08752e-45	ENSG00000225767	AL049637.1
ENSG00000230570	2.42755	-1.17816	0.336777	-3.49833	0.00046818	0.00101271	ENSG00000230570	AL139095.3		ENSG00000227197	2.82525	4.04892	0.279375	14.4928	1.34637e-47	1.10294e-45	ENSG00000227197	AC009365.3
ENSG00000253164	5.61255	-1.09241	0.31744	-3.4413	0.000578936	0.00123664	ENSG00000253164	AC023403.1		ENSG00000104883	333.3	1.17408	0.0810122	14.4926	1.34928e-47	1.1035e-45	ENSG00000104883	PEX11G
ENSG00000187533	16.9113	-1.90193	0.558602	-3.4048	0.000662136	0.00140292	ENSG00000187533	PRR27		ENSG00000205106	10.0136	2.03411	0.140395	14.4885	1.43203e-47	1.16923e-45	ENSG00000205106	AC044839.1
ENSG00000267746	0.648316	-1.70401	0.509731	-3.34296	0.00082889	0.00173311	ENSG00000267746	AC104985.1		ENSG00000253119	2.99659	2.83003	0.195438	14.4805	1.60986e-47	1.31008e-45	ENSG00000253119	HNRNPA3P7
ENSG00000144820	4.07176	-1.03498	0.309888	-3.33986	0.000838217	0.00175135	ENSG00000144820	ADGRG7		ENSG00000186010	1846.68	1.03585	0.0715538	14.4766	1.70408e-47	1.38447e-45	ENSG00000186010	NDUFA13
ENSG00000248547	0.944127	-1.11619	0.337367	-3.30852	0.000937889	0.00194548	ENSG00000248547	AC021146.2		ENSG00000272219	3.98409	3.11069	0.214886	14.476	1.71783e-47	1.39105e-45	ENSG00000272219	AC005072.1
ENSG00000131914	22.7083	-1.00075	0.311198	-3.2158	0.00130084	0.00264312	ENSG00000131914	LIN28A		ENSG00000215184	2.72617	4.39673	0.303724	14.4761	1.71628e-47	1.39105e-45	ENSG00000215184	RPS12P16
ENSG00000139352	252.205	-1.04878	0.329735	-3.18068	0.00146928	0.00295888	ENSG00000139352	ASCL1		ENSG00000213721	2.56504	3.14653	0.217385	14.4745	1.75658e-47	1.42009e-45	ENSG00000213721	HMGN2P30
ENSG00000170099	1078.38	-1.02014	0.323051	-3.15784	0.00158944	0.00318198	ENSG00000170099	SERPINA6		ENSG00000280413	5.21428	2.57327	0.177783	14.4742	1.7644e-47	1.42407e-45	ENSG00000280413
ENSG00000234373	1.81082	-1.20781	0.382499	-3.15768	0.00159028	0.00318327	ENSG00000234373	SNX18P7		ENSG00000259118	15.0375	1.93253	0.13352	14.4737	1.77594e-47	1.43104e-45	ENSG00000259118	AL139022.1
ENSG00000139515	4.59798	-1.477	0.468986	-3.14936	0.00163629	0.00326846	ENSG00000139515	PDX1		ENSG00000231795	2.72908	3.45598	0.238806	14.4719	1.82349e-47	1.46696e-45	ENSG00000231795	ITCH-IT1
ENSG00000207148	1.46131	-1.04497	0.332566	-3.14214	0.00167719	0.00334364	ENSG00000207148	RF00019		ENSG00000237704	4.07741	5.27067	0.364276	14.4689	1.90498e-47	1.53002e-45	ENSG00000237704	AP004289.2
ENSG00000235623	1.13793	-1.22593	0.39222	-3.12562	0.0017743	0.00352526	ENSG00000235623	OR7E110P		ENSG00000250733	2.88321	3.70119	0.255893	14.4638	2.05175e-47	1.64521e-45	ENSG00000250733	C8orf17
ENSG00000213218	0.692769	-1.52488	0.497443	-3.06544	0.00217347	0.00426092	ENSG00000213218	CSH2		ENSG00000276030	11.0292	1.63827	0.113299	14.4597	2.17844e-47	1.74395e-45	ENSG00000276030	AC073534.1
ENSG00000276707	0.625004	-1.56545	0.517643	-3.02419	0.002493	0.0048424	ENSG00000276707	AC243773.1		ENSG00000223642	3.53613	3.1396	0.217187	14.4558	2.30566e-47	1.84281e-45	ENSG00000223642	AC008277.1
ENSG00000168124	2.38439	-1.17724	0.390295	-3.01629	0.00255891	0.00496298	ENSG00000168124	OR1F1		ENSG00000272843	8.32334	1.9209	0.132892	14.4546	2.34509e-47	1.87128e-45	ENSG00000272843	AC211476.2
ENSG00000253802	142.964	-1.09763	0.366558	-2.99443	0.0027496	0.00530566	ENSG00000253802	AC105999.2		ENSG00000135722	296.966	1.06406	0.0736302	14.4514	2.45666e-47	1.95714e-45	ENSG00000135722	FBXL8
ENSG00000156269	3.59711	-1.31802	0.441372	-2.9862	0.00282472	0.00544016	ENSG00000156269	NAA11		ENSG00000257298	33.8162	1.84006	0.127336	14.4504	2.4921e-47	1.98216e-45	ENSG00000257298	AC008147.2
ENSG00000253715	0.561401	-1.22829	0.412862	-2.97507	0.00292921	0.00562797	ENSG00000253715	AC083841.2		ENSG00000232878	2.94697	3.19866	0.221535	14.4386	2.9569e-47	2.34807e-45	ENSG00000232878	DPYD-AS1
ENSG00000248294	0.517363	-1.32755	0.446635	-2.97234	0.00295534	0.00567398	ENSG00000248294	AC008780.1		ENSG00000280326	3.36799	2.87879	0.19944	14.4344	3.1429e-47	2.49175e-45	ENSG00000280326	AC067931.2
ENSG00000280322	1.41981	-1.6042	0.542633	-2.95632	0.00311337	0.005956	ENSG00000280322	AL035425.4		ENSG00000272381	4.08208	1.95781	0.13564	14.4338	3.16894e-47	2.50835e-45	ENSG00000272381	AL356258.1
ENSG00000229520	1.1953	-2.17728	0.745085	-2.92219	0.00347576	0.00660182	ENSG00000229520	LINC00404		ENSG00000259158	19.8513	1.63047	0.112965	14.4335	3.18725e-47	2.5188e-45	ENSG00000259158	ADAM20P1
ENSG00000159248	0.754954	-1.81401	0.62096	-2.9213	0.00348576	0.00661979	ENSG00000159248	GJD2		ENSG00000219448	3.16338	3.06134	0.212113	14.4326	3.22636e-47	2.54562e-45	ENSG00000219448
ENSG00000254609	1.57848	-1.05232	0.362504	-2.90292	0.00369707	0.0069941	ENSG00000254609	AC136443.1		ENSG00000253372	9.24487	2.23128	0.154637	14.4292	3.39166e-47	2.67176e-45	ENSG00000253372	AC016405.1
ENSG00000269745	0.793949	-1.49154	0.51901	-2.87381	0.00405555	0.00762481	ENSG00000269745	AC006262.3		ENSG00000226493	6.24458	1.96264	0.136048	14.4261	3.54318e-47	2.78666e-45	ENSG00000226493	RPL26P27
ENSG00000206931	0.859529	-1.31567	0.463579	-2.83806	0.00453881	0.00845398	ENSG00000206931	RNU6-1042P		ENSG00000272406	3.00459	4.58754	0.318032	14.4247	3.61594e-47	2.83935e-45	ENSG00000272406	AC108102.1
ENSG00000257271	21.8662	-1.03278	0.365026	-2.82934	0.00466442	0.00866988	ENSG00000257271	KIRREL3-AS1		ENSG00000267882	9.25357	1.9337	0.134092	14.4207	3.83522e-47	3.00196e-45	ENSG00000267882	AL031666.2
ENSG00000234460	0.715878	-1.03857	0.369782	-2.80861	0.00497556	0.00920581	ENSG00000234460	AL772337.3		ENSG00000131409	44.576	1.71263	0.118789	14.4174	4.02184e-47	3.14304e-45	ENSG00000131409	LRRC4B
ENSG00000126752	9.48639	-1.61943	0.577488	-2.80427	0.00504303	0.00932155	ENSG00000126752	SSX1		ENSG00000280138	251.214	1.4794	0.102666	14.4099	4.48385e-47	3.49854e-45	ENSG00000280138	AC027290.2
ENSG00000164113	0.558786	-1.14275	0.409622	-2.78976	0.00527467	0.00972087	ENSG00000164113	ADAD1		ENSG00000259999	2.00758	4.13146	0.286736	14.4086	4.56975e-47	3.55992e-45	ENSG00000259999	AC009054.1
ENSG00000168333	1.40622	-1.53348	0.555898	-2.75857	0.00580555	0.0106182	ENSG00000168333	PPDPFL		ENSG00000262265	3.04689	3.31466	0.230118	14.4042	4.87139e-47	3.78891e-45	ENSG00000262265	AC002558.3
ENSG00000237412	1.66665	-1.02511	0.372396	-2.75275	0.00590977	0.0107939	ENSG00000237412	PRSS56		ENSG00000249476	24.312	1.56906	0.108944	14.4024	4.99927e-47	3.87613e-45	ENSG00000249476	AC008467.1
ENSG00000278630	1.64312	-2.28053	0.829006	-2.75092	0.00594274	0.0108481	ENSG00000278630	LINC02335		ENSG00000259481	3.79105	3.71807	0.258239	14.3978	5.3446e-47	4.13736e-45	ENSG00000259481	AC012404.1
ENSG00000270038	1.36919	-1.11973	0.411891	-2.71851	0.00655772	0.0118857	ENSG00000270038	AL133467.4		ENSG00000243849	3.84928	2.57516	0.178864	14.3973	5.37934e-47	4.15771e-45	ENSG00000243849	CFAP44-AS1
ENSG00000227932	1.94387	-1.68181	0.639724	-2.62897	0.00856439	0.0151884	ENSG00000227932	SELENOOLP		ENSG00000203737	3.70312	3.19868	0.222189	14.3962	5.46392e-47	4.21647e-45	ENSG00000203737	GPR52
ENSG00000280081	22.7024	-1.20607	0.462101	-2.60997	0.00905496	0.0159921	ENSG00000280081	LINC01667		ENSG00000238103	20.6545	1.1616	0.0807021	14.3936	5.67329e-47	4.37119e-45	ENSG00000238103	RPL9P7
ENSG00000180770	0.474411	-1.11757	0.429955	-2.59927	0.00934226	0.0164617	ENSG00000180770	OR7E129P		ENSG00000225200	130.81	1.33791	0.0929623	14.392	5.80787e-47	4.46788e-45	ENSG00000225200	AC246787.1
ENSG00000250710	0.655604	-1.46213	0.579768	-2.52192	0.0116716	0.0202217	ENSG00000250710	OR7E99P		ENSG00000250582	3.52932	3.76865	0.261988	14.3848	6.44328e-47	4.94896e-45	ENSG00000250582	SMAD1-AS2
ENSG00000126890	5.1791	-1.4088	0.561767	-2.5078	0.0121484	0.0209813	ENSG00000126890	CTAG2		ENSG00000261369	3.47278	3.81151	0.265009	14.3826	6.65684e-47	5.10503e-45	ENSG00000261369	AC007533.1
ENSG00000268038	2.01546	-1.0921	0.445048	-2.4539	0.0141316	0.0241146	ENSG00000268038	LINC01785		ENSG00000257802	6.15607	2.37385	0.165103	14.378	7.11613e-47	5.44876e-45	ENSG00000257802	AC089984.2
ENSG00000238125	1.90152	-1.04789	0.432398	-2.42344	0.0153742	0.0260831	ENSG00000238125	SLC9A3P2		ENSG00000124835	3.0979	3.7871	0.26353	14.3707	7.90744e-47	6.02655e-45	ENSG00000124835	AC105760.1
ENSG00000259485	4.48707	-1.00464	0.424375	-2.36733	0.0179171	0.0300299	ENSG00000259485	LINC02253		ENSG00000279977	3.39879	3.19938	0.222794	14.3603	9.18886e-47	6.98155e-45	ENSG00000279977	AC008764.10
ENSG00000232508	0.74999	-1.09827	0.464005	-2.36694	0.0179359	0.0300585	ENSG00000232508	MRPL45P1		ENSG00000249012	2.64159	3.57015	0.248709	14.3547	9.95003e-47	7.54823e-45	ENSG00000249012	AC104819.1
ENSG00000167531	113.223	-1.38931	0.5871	-2.36639	0.0179623	0.0300965	ENSG00000167531	LALBA		ENSG00000239437	6.31047	2.78403	0.194004	14.3503	1.06004e-46	8.0292e-45	ENSG00000239437	RN7SL752P
ENSG00000275216	17.2417	-1.10866	0.468773	-2.36503	0.0180284	0.030196	ENSG00000275216	AL161431.1		ENSG00000273691	8.95089	2.47261	0.172329	14.3482	1.09361e-46	8.27078e-45	ENSG00000273691	AC087284.1
ENSG00000272311	0.481411	-1.01233	0.433662	-2.33438	0.0195757	0.0325461	ENSG00000272311	IFNL4P1		ENSG00000274598	2.78137	3.47819	0.242444	14.3464	1.12231e-46	8.46184e-45	ENSG00000274598	AC087893.1
ENSG00000226141	0.492167	-1.49124	0.644813	-2.31267	0.0207408	0.0343268	ENSG00000226141	AC244107.1		ENSG00000225711	2.97375	4.13977	0.2886	14.3443	1.15653e-46	8.7065e-45	ENSG00000225711	AL512326.1
ENSG00000244222	0.708913	-1.01282	0.440775	-2.29781	0.0215724	0.0355703	ENSG00000244222	OR7E121P		ENSG00000267694	7.30368	3.08856	0.215334	14.3431	1.17725e-46	8.84893e-45	ENSG00000267694	AP005131.5
ENSG00000280776	0.652505	-1.79605	0.789105	-2.27607	0.0228421	0.0374669	ENSG00000280776	LINC01202		ENSG00000228280	3.10288	3.2583	0.22718	14.3424	1.18898e-46	8.9235e-45	ENSG00000228280	AL731568.1
ENSG00000189186	1.68013	-1.0304	0.454353	-2.26783	0.0233393	0.0381896	ENSG00000189186	DCAF8L2		ENSG00000162877	16.8739	1.86839	0.13029	14.3403	1.22494e-46	9.17941e-45	ENSG00000162877	PM20D1
ENSG00000261122	1.2056	-1.1801	0.53229	-2.21703	0.0266211	0.0430588	ENSG00000261122	LINC02167		ENSG00000237025	3.98982	2.70068	0.188392	14.3354	1.31461e-46	9.83636e-45	ENSG00000237025	AL121601.2
ENSG00000271776	0.527669	-1.15338	0.520508	-2.21588	0.0266997	0.0431703	ENSG00000271776	AL445209.1		ENSG00000238109	7.59991	2.02777	0.141456	14.335	1.3217e-46	9.87442e-45	ENSG00000238109	AC004893.1
ENSG00000269586	1.11157	-1.42227	0.651039	-2.18462	0.0289167	0.0464028	ENSG00000269586	CT45A10		ENSG00000181741	3.40717	2.36038	0.164757	14.3264	1.49727e-46	1.11692e-44	ENSG00000181741	FDX1P1
ENSG00000224853	19.057	-1.06457	0.492353	-2.1622	0.030603	0.048843	ENSG00000224853	LINC00393		ENSG00000130222	835.752	1.57981	0.110278	14.3257	1.51294e-46	1.1269e-44	ENSG00000130222	GADD45G
ENSG00000258815	8.51322	-1.05527	0.489474	-2.15592	0.03109	0.0495399	ENSG00000258815	AC131532.1		ENSG00000277494	207.197	1.80775	0.126191	14.3255	1.51655e-46	1.12788e-44	ENSG00000277494	GPIHBP1
										ENSG00000251171	3.34655	4.51453	0.3153	14.3182	1.68386e-46	1.25042e-44	ENSG00000251171	AC096741.1
										ENSG00000167617	272.599	1.53468	0.107246	14.3099	1.89848e-46	1.40556e-44	ENSG00000167617	CDC42EP5
										ENSG00000230300	2.75262	3.78409	0.264448	14.3094	1.91167e-46	1.4132e-44	ENSG00000230300	STARD13-IT1
										ENSG00000245532	35682	1.57063	0.109787	14.3061	2.00376e-46	1.47906e-44	ENSG00000245532	NEAT1
										ENSG00000235816	3.23817	2.63187	0.184009	14.3029	2.09767e-46	1.54606e-44	ENSG00000235816	PRELID1P3
										ENSG00000229989	8.41962	2.44082	0.170736	14.2958	2.32317e-46	1.70715e-44	ENSG00000229989	MIR181A1HG
										ENSG00000279814	4.48088	5.77365	0.404018	14.2906	2.50502e-46	1.83804e-44	ENSG00000279814	AC010997.6
										ENSG00000213216	2.86903	2.45894	0.172148	14.2839	2.75873e-46	2.01818e-44	ENSG00000213216	AC007066.1
										ENSG00000131097	82.4662	1.07835	0.0754969	14.2833	2.77931e-46	2.03021e-44	ENSG00000131097	HIGD1B
										ENSG00000136149	261.138	1.37629	0.0963683	14.2815	2.85226e-46	2.08042e-44	ENSG00000136149	RPL13AP25
										ENSG00000249593	11.1606	2.04253	0.143027	14.2808	2.88373e-46	2.10026e-44	ENSG00000249593	AC011405.1
										ENSG00000279707	2.96323	3.26169	0.228409	14.2801	2.91263e-46	2.11817e-44	ENSG00000279707	AC120349.3
										ENSG00000273165	3.95159	2.29115	0.16048	14.2769	3.04942e-46	2.21112e-44	ENSG00000273165	AL121652.1
										ENSG00000280543	16.6034	1.89176	0.132509	14.2765	3.0683e-46	2.22154e-44	ENSG00000280543	ASAP1-IT2
										ENSG00000267375	3.18725	3.34509	0.234315	14.276	3.08703e-46	2.23182e-44	ENSG00000267375	AC008649.2
										ENSG00000155511	68.8626	3.32267	0.232754	14.2755	3.1112e-46	2.246e-44	ENSG00000155511	GRIA1
										ENSG00000147059	13.7766	1.7214	0.120621	14.2712	3.30974e-46	2.38582e-44	ENSG00000147059	SPIN2A
										ENSG00000279176	3.75921	5.14976	0.360921	14.2684	3.44494e-46	2.47965e-44	ENSG00000279176	AC079316.2
										ENSG00000268322	2.77797	3.33526	0.233763	14.2677	3.47719e-46	2.49921e-44	ENSG00000268322	BNIP3P25
										ENSG00000234358	1.96488	4.14371	0.290435	14.2672	3.50217e-46	2.51349e-44	ENSG00000234358	AC003080.1
										ENSG00000255933	5.51184	2.27088	0.159196	14.2647	3.63168e-46	2.60265e-44	ENSG00000255933	AC117500.2
										ENSG00000222046	18.9476	1.81011	0.126922	14.2616	3.79724e-46	2.71735e-44	ENSG00000222046	DCDC2B
										ENSG00000254366	12.4063	2.28885	0.160502	14.2606	3.85348e-46	2.75358e-44	ENSG00000254366	AC062004.1
										ENSG00000256712	2.78801	3.50312	0.245745	14.2551	4.16672e-46	2.97311e-44	ENSG00000256712	AC134349.1
										ENSG00000224315	3.21031	2.75835	0.193533	14.2526	4.31686e-46	3.07578e-44	ENSG00000224315	RPL7P7
										ENSG00000257568	3.3824	3.01632	0.21166	14.2507	4.43536e-46	3.15564e-44	ENSG00000257568	AC079035.1
										ENSG00000269028	100.712	1.75556	0.123208	14.2488	4.56067e-46	3.24012e-44	ENSG00000269028	MTRNR2L12
										ENSG00000205500	5.0527	2.22033	0.155832	14.2482	4.60102e-46	3.26407e-44	ENSG00000205500	AC013472.1
										ENSG00000228368	3.32439	5.1228	0.359566	14.2472	4.66771e-46	3.30567e-44	ENSG00000228368	AC106873.1
										ENSG00000277959	21.7052	1.10236	0.0773744	14.2471	4.67309e-46	3.30567e-44	ENSG00000277959	AL162274.2
										ENSG00000226533	3.79782	3.68294	0.258609	14.2413	5.07462e-46	3.58456e-44	ENSG00000226533	BTBD9-AS1
										ENSG00000243260	4.85962	2.47841	0.174054	14.2393	5.22728e-46	3.68711e-44	ENSG00000243260	RN7SL558P
										ENSG00000237328	2.91031	3.40394	0.239098	14.2366	5.42901e-46	3.82392e-44	ENSG00000237328	RAI1-AS1
										ENSG00000186628	7.60443	1.76117	0.123751	14.2316	5.83662e-46	4.10213e-44	ENSG00000186628	FSD2
										ENSG00000225746	5.8656	2.27603	0.159929	14.2315	5.84066e-46	4.10213e-44	ENSG00000225746	MEG8
										ENSG00000214676	3.40969	3.24619	0.22811	14.2308	5.89823e-46	4.13666e-44	ENSG00000214676	RPL9P16
										ENSG00000256399	4.12423	3.5481	0.24934	14.2299	5.97391e-46	4.18377e-44	ENSG00000256399	AC079866.1
										ENSG00000168874	153.824	1.72836	0.121534	14.2212	6.76858e-46	4.73358e-44	ENSG00000168874	ATOH8
										ENSG00000270772	2.97489	4.98291	0.350458	14.2183	7.05709e-46	4.92835e-44	ENSG00000270772	PDHA1P1
										ENSG00000237234	13.9323	1.97279	0.138849	14.2082	8.15403e-46	5.6783e-44	ENSG00000237234	Z99289.1
										ENSG00000271964	17.6958	1.35394	0.0952984	14.2074	8.24222e-46	5.7316e-44	ENSG00000271964	AC090948.1
										ENSG00000229948	2.85221	3.96704	0.279262	14.2055	8.47381e-46	5.88434e-44	ENSG00000229948	B3GALNT1P1
										ENSG00000251229	8.49065	2.04523	0.143991	14.2039	8.66708e-46	6.01007e-44	ENSG00000251229	AL645924.2
										ENSG00000237406	4.52135	2.28697	0.161028	14.2023	8.86583e-46	6.13924e-44	ENSG00000237406	NDUFA9P1
										ENSG00000231169	3.45553	2.22029	0.156357	14.2002	9.13927e-46	6.3197e-44	ENSG00000231169	EEF1B2P1
										ENSG00000213609	48.5205	1.23614	0.0870559	14.1994	9.24488e-46	6.37482e-44	ENSG00000213609	RPL7AP50
										ENSG00000236327	2.94661	4.50288	0.317214	14.1951	9.8277e-46	6.76723e-44	ENSG00000236327	AL831737.1
										ENSG00000278967	4.24135	2.93395	0.206706	14.1939	1.00005e-45	6.87661e-44	ENSG00000278967	AL138847.2
										ENSG00000213055	3.63968	2.31866	0.163376	14.1921	1.02476e-45	7.03672e-44	ENSG00000213055	EEF1B2P7
										ENSG00000231307	5.47563	2.37338	0.167245	14.1911	1.0401e-45	7.12218e-44	ENSG00000231307	RPS3P2
										ENSG00000235112	2.35715	4.12686	0.290869	14.188	1.08649e-45	7.42949e-44	ENSG00000235112	HSPE1P27
										ENSG00000236559	6.5995	2.21708	0.156326	14.1825	1.17609e-45	8.01992e-44	ENSG00000236559	AL117381.1
										ENSG00000258648	3.95489	2.78508	0.196374	14.1825	1.17527e-45	8.01992e-44	ENSG00000258648	UBE2CP1
										ENSG00000241269	27.2494	1.57065	0.110753	14.1816	1.1916e-45	8.11444e-44	ENSG00000241269	AC093620.1
										ENSG00000259499	2.90937	3.10711	0.219315	14.1674	1.45901e-45	9.92166e-44	ENSG00000259499	AC090519.2
										ENSG00000269806	3.1657	3.65228	0.257927	14.1601	1.61718e-45	1.09821e-43	ENSG00000269806	BICRA-AS1
										ENSG00000265261	3.91202	2.94671	0.208113	14.1592	1.63914e-45	1.11159e-43	ENSG00000265261	AC027575.1
										ENSG00000268257	2.22134	4.16138	0.29395	14.1568	1.69615e-45	1.14867e-43	ENSG00000268257	AIRN
										ENSG00000258337	3.50966	4.19236	0.296169	14.1553	1.73278e-45	1.17187e-43	ENSG00000258337	AC130895.1
										ENSG00000237672	17.2733	1.91649	0.135443	14.1498	1.87228e-45	1.26447e-43	ENSG00000237672	KRR1P1
										ENSG00000259924	3.8024	2.29722	0.162406	14.1449	2.00792e-45	1.35052e-43	ENSG00000259924	AC011939.1
										ENSG00000230022	2.84064	3.11552	0.22031	14.1415	2.10669e-45	1.41502e-43	ENSG00000230022	FNTAP2
										ENSG00000230568	5.29173	2.21169	0.156406	14.1407	2.13238e-45	1.43032e-43	ENSG00000230568	SF3A3P1
										ENSG00000239483	6.16914	1.98495	0.140397	14.1381	2.21077e-45	1.48089e-43	ENSG00000239483	RPS15AP16
										ENSG00000259617	3.428	2.847	0.20139	14.1367	2.25502e-45	1.50642e-43	ENSG00000259617	AC020661.3
										ENSG00000175106	164.575	1.1192	0.0791939	14.1325	2.39637e-45	1.59868e-43	ENSG00000175106	TVP23C
										ENSG00000232573	756.277	1.52706	0.108066	14.1308	2.45274e-45	1.63408e-43	ENSG00000232573	RPL3P4
										ENSG00000226318	13.5732	1.7975	0.127237	14.1272	2.58354e-45	1.71889e-43	ENSG00000226318	RPS3AP38
										ENSG00000198590	45.3819	1.18919	0.0842036	14.1228	2.74697e-45	1.82516e-43	ENSG00000198590	C3orf35
										ENSG00000213904	115.155	1.10026	0.077909	14.1224	2.76584e-45	1.83522e-43	ENSG00000213904	LIPE-AS1
										ENSG00000230826	2.93512	4.49893	0.318576	14.122	2.78103e-45	1.84282e-43	ENSG00000230826	AL390774.2
										ENSG00000228599	3.9417	2.34253	0.165942	14.1165	3.00424e-45	1.98805e-43	ENSG00000228599	RPL7P52
										ENSG00000259532	2.04578	3.88684	0.275353	14.1159	3.03312e-45	2.00446e-43	ENSG00000259532	AC009269.2
										ENSG00000200312	10.8519	8.07798	0.5723	14.1149	3.0731e-45	2.02817e-43	ENSG00000200312	RN7SKP255
										ENSG00000280295	4.72635	2.53687	0.179764	14.1122	3.19337e-45	2.1019e-43	ENSG00000280295	AC099811.6
										ENSG00000187229	3.10428	4.87934	0.345755	14.1121	3.19806e-45	2.10218e-43	ENSG00000187229	AC100800.1
										ENSG00000224973	6.00144	2.89314	0.205022	14.1114	3.23199e-45	2.12165e-43	ENSG00000224973	LARGE-AS1
										ENSG00000236564	2.90515	3.43096	0.2432	14.1076	3.41105e-45	2.23621e-43	ENSG00000236564	YWHAQP5
										ENSG00000279887	3.28376	3.68686	0.261457	14.1012	3.73267e-45	2.44056e-43	ENSG00000279887	AC046158.4
										ENSG00000243107	15.5654	1.73821	0.123297	14.0977	3.92224e-45	2.56111e-43	ENSG00000243107	AC000120.1
										ENSG00000244691	3.91923	2.40633	0.170701	14.0967	3.97699e-45	2.59342e-43	ENSG00000244691	RPL10AP1
										ENSG00000225761	3.43768	2.79296	0.198203	14.0914	4.29101e-45	2.79233e-43	ENSG00000225761	AL596247.1
										ENSG00000197182	258.85	1.67326	0.118744	14.0913	4.29336e-45	2.79233e-43	ENSG00000197182	MIRLET7BHG
										ENSG00000231010	22.6968	1.71849	0.121966	14.09	4.3784e-45	2.84388e-43	ENSG00000231010	AL121672.1
										ENSG00000249850	7.63717	2.06271	0.146514	14.0786	5.14254e-45	3.33581e-43	ENSG00000249850	KRT18P31
										ENSG00000224751	2.45896	3.78911	0.269201	14.0754	5.38286e-45	3.4871e-43	ENSG00000224751	SHMT1P1
										ENSG00000227309	2.32697	3.49551	0.248374	14.0736	5.52182e-45	3.57242e-43	ENSG00000227309	AC140076.1
										ENSG00000279236	9.77861	2.32916	0.165632	14.0623	6.47652e-45	4.17867e-43	ENSG00000279236	AC064801.2
										ENSG00000233693	7.33265	2.87823	0.204677	14.0623	6.4751e-45	4.17867e-43	ENSG00000233693	AL357568.1
										ENSG00000280222	15.7537	2.52029	0.179224	14.0622	6.48434e-45	4.17867e-43	ENSG00000280222	AL365209.1
										ENSG00000230322	3.05205	4.72993	0.336488	14.0568	7.00093e-45	4.49979e-43	ENSG00000230322	AL136320.1
										ENSG00000227948	3.3884	5.20341	0.370187	14.0562	7.06134e-45	4.5327e-43	ENSG00000227948	AC003989.1
										ENSG00000227068	2.85029	4.44524	0.316334	14.0524	7.44709e-45	4.77409e-43	ENSG00000227068	AL162584.1
										ENSG00000249302	2.80623	3.588	0.255593	14.0379	9.1342e-45	5.84802e-43	ENSG00000249302	FTH1P24
										ENSG00000218313	4.00182	4.71421	0.3359	14.0346	9.57869e-45	6.12464e-43	ENSG00000218313	AL139274.1
										ENSG00000225885	11.104	1.98197	0.141225	14.0342	9.63094e-45	6.15006e-43	ENSG00000225885	AC023590.1
										ENSG00000280408	4.01421	2.38113	0.169812	14.0222	1.14082e-44	7.27555e-43	ENSG00000280408	AC032044.2
										ENSG00000181722	160.289	1.70179	0.121394	14.0187	1.19818e-44	7.63146e-43	ENSG00000181722	ZBTB20
										ENSG00000274155	3.78219	3.5121	0.250534	14.0185	1.20167e-44	7.64378e-43	ENSG00000274155
										ENSG00000241278	16.4298	1.85143	0.132135	14.0117	1.32195e-44	8.39806e-43	ENSG00000241278	ENPP7P4
										ENSG00000220867	3.3987	2.71505	0.193875	14.0041	1.4707e-44	9.331e-43	ENSG00000220867	HSPE1P26
										ENSG00000248415	8.68428	1.97843	0.141292	14.0024	1.50767e-44	9.54093e-43	ENSG00000248415	GAPDHP61
										ENSG00000201533	2.25511	4.48796	0.320772	13.9911	1.76625e-44	1.11629e-42	ENSG00000201533	RN7SKP237
										ENSG00000237088	2.26533	4.00618	0.286592	13.9787	2.1029e-44	1.32566e-42	ENSG00000237088	AL163193.1
										ENSG00000223704	23.5092	1.73471	0.124128	13.9752	2.21033e-44	1.38982e-42	ENSG00000223704	LINC01422
										ENSG00000256705	4.59366	1.94628	0.139522	13.9497	3.16091e-44	1.97995e-42	ENSG00000256705	AL137779.1
										ENSG00000261714	2.34937	3.41545	0.244923	13.945	3.37355e-44	2.10244e-42	ENSG00000261714	AC105137.1
										ENSG00000244052	9.29857	1.64418	0.117959	13.9385	3.69604e-44	2.29761e-42	ENSG00000244052	RPL5P24
										ENSG00000264196	3.99334	3.54221	0.254172	13.9363	3.81332e-44	2.36753e-42	ENSG00000264196	AC011120.1
										ENSG00000255097	2.44998	5.00434	0.359132	13.9345	3.90811e-44	2.42333e-42	ENSG00000255097	AP006259.1
										ENSG00000232693	3.48901	2.85073	0.204656	13.9294	4.20079e-44	2.59826e-42	ENSG00000232693	AC012370.1
										ENSG00000270585	7.43537	2.4195	0.173739	13.9261	4.39787e-44	2.71675e-42	ENSG00000270585	AL445435.1
										ENSG00000235060	2.41755	3.39537	0.243838	13.9247	4.48439e-44	2.76672e-42	ENSG00000235060	VDAC1P4
										ENSG00000237170	2.84572	3.1766	0.228232	13.9183	4.90348e-44	3.01772e-42	ENSG00000237170	RPS7P15
										ENSG00000200091	2.54856	3.68166	0.264557	13.9164	5.03895e-44	3.09722e-42	ENSG00000200091	RN7SKP163
										ENSG00000274251	9.88171	1.90671	0.137013	13.9162	5.04806e-44	3.09895e-42	ENSG00000274251	AP003419.2
										ENSG00000229531	3.30321	3.30665	0.237626	13.9154	5.10941e-44	3.12882e-42	ENSG00000229531	Z99127.1
										ENSG00000203397	2.40087	3.25405	0.233948	13.9093	5.56505e-44	3.4036e-42	ENSG00000203397	AL139400.1
										ENSG00000240395	21.1548	1.31845	0.0948075	13.9066	5.77529e-44	3.5278e-42	ENSG00000240395	RPL5P23
										ENSG00000280036	3.15745	4.00842	0.288486	13.8947	6.8227e-44	4.15215e-42	ENSG00000280036	AC020661.4
										ENSG00000239373	2.68399	4.28529	0.308468	13.8921	7.06834e-44	4.29633e-42	ENSG00000239373
										ENSG00000234925	20.2948	1.72862	0.124487	13.8859	7.7093e-44	4.67438e-42	ENSG00000234925	ATP5PDP4
										ENSG00000241772	5.15726	2.89665	0.208656	13.8824	8.09872e-44	4.90446e-42	ENSG00000241772	AC092620.2
										ENSG00000237329	2.99704	4.13656	0.298188	13.8723	9.3213e-44	5.63789e-42	ENSG00000237329	AL356320.2
										ENSG00000233762	217.456	1.40156	0.101052	13.8697	9.67395e-44	5.84402e-42	ENSG00000233762	AC007969.1
										ENSG00000275056	8.69829	1.70405	0.122868	13.869	9.76615e-44	5.89248e-42	ENSG00000275056	AC020663.3
										ENSG00000226801	3.21611	3.0066	0.21679	13.8687	9.79928e-44	5.90524e-42	ENSG00000226801	OSTCP8
										ENSG00000223974	3.53062	2.92877	0.21118	13.8686	9.81501e-44	5.90749e-42	ENSG00000223974	BNIP3P42
										ENSG00000261529	7.72689	2.3368	0.168522	13.8665	1.01139e-43	6.07992e-42	ENSG00000261529	AC100774.1
										ENSG00000278881	3.59087	2.54928	0.183876	13.8641	1.04495e-43	6.27406e-42	ENSG00000278881	FP325331.1
										ENSG00000274963	6.76415	2.28135	0.164552	13.864	1.04678e-43	6.27739e-42	ENSG00000274963	RN7SL600P
										ENSG00000252452	2.2929	4.31449	0.311319	13.8587	1.12637e-43	6.73824e-42	ENSG00000252452	RNU6-107P
										ENSG00000168060	149.842	1.01219	0.0730389	13.8582	1.1348e-43	6.78042e-42	ENSG00000168060	NAALADL1
										ENSG00000269821	687.094	1.60014	0.115536	13.8497	1.27803e-43	7.61772e-42	ENSG00000269821	KCNQ1OT1
										ENSG00000202078	6.11746	2.02534	0.14626	13.8475	1.31746e-43	7.84329e-42	ENSG00000202078	RF00019
										ENSG00000273245	7.73988	1.65354	0.119469	13.8407	1.44778e-43	8.59833e-42	ENSG00000273245	AC092653.1
										ENSG00000207475	4.93693	2.4598	0.177846	13.831	1.656e-43	9.82306e-42	ENSG00000207475	SNORA80E
										ENSG00000243193	4.89785	2.42715	0.175551	13.8259	1.77812e-43	1.05221e-41	ENSG00000243193	AC006387.1
										ENSG00000267734	2.73022	3.54341	0.256292	13.8257	1.78419e-43	1.05454e-41	ENSG00000267734	AL121989.1
										ENSG00000267924	17.5194	2.25701	0.163309	13.8205	1.91772e-43	1.1321e-41	ENSG00000267924	AC139769.2
										ENSG00000242488	1.97788	3.68126	0.266372	13.82	1.93109e-43	1.13863e-41	ENSG00000242488	AF107885.1
										ENSG00000277452	5.02354	2.30886	0.167082	13.8187	1.96471e-43	1.15707e-41	ENSG00000277452	RN7SL473P
										ENSG00000250980	2.11638	3.12706	0.226352	13.815	2.0692e-43	1.21714e-41	ENSG00000250980	AC113155.1
										ENSG00000273733	13.3303	1.33099	0.096387	13.8088	2.25475e-43	1.3247e-41	ENSG00000273733	AC011472.4
										ENSG00000279394	2.70716	2.91663	0.211365	13.799	2.58447e-43	1.51481e-41	ENSG00000279394	AC015871.4
										ENSG00000169075	2.5263	4.13893	0.300211	13.7867	3.06271e-43	1.79085e-41	ENSG00000169075	Z99496.1
										ENSG00000259935	10.7339	1.85391	0.134472	13.7866	3.06862e-43	1.79218e-41	ENSG00000259935	AC009754.1
										ENSG00000225934	2.44392	2.87562	0.208591	13.7859	3.09802e-43	1.8072e-41	ENSG00000225934	AL592310.1
										ENSG00000265739	2.53666	2.87664	0.208747	13.7805	3.33919e-43	1.94558e-41	ENSG00000265739	AC104984.3
										ENSG00000267393	3.41221	4.77416	0.346544	13.7765	3.52906e-43	2.05378e-41	ENSG00000267393	AP002439.1
										ENSG00000271199	5.0308	2.03249	0.14754	13.7758	3.56241e-43	2.07074e-41	ENSG00000271199	AL353804.2
										ENSG00000279883	2.79794	5.0571	0.367123	13.775	3.60603e-43	2.09362e-41	ENSG00000279883	AC010480.1
										ENSG00000226632	3.4466	2.55001	0.185191	13.7696	3.8809e-43	2.24527e-41	ENSG00000226632	UBE2V1P1
										ENSG00000228292	2.82545	4.80004	0.348683	13.7662	4.0695e-43	2.35162e-41	ENSG00000228292	AL512604.1
										ENSG00000280190	3.89544	4.04841	0.294116	13.7647	4.15648e-43	2.39906e-41	ENSG00000280190	AC027279.4
										ENSG00000241535	3.67282	2.89006	0.210039	13.7597	4.45467e-43	2.56816e-41	ENSG00000241535	CBX5P1
										ENSG00000232136	1.88283	3.54226	0.257496	13.7566	4.65197e-43	2.67877e-41	ENSG00000232136	DUXAP7
										ENSG00000120903	15.467	3.69013	0.268272	13.7551	4.74365e-43	2.72838e-41	ENSG00000120903	CHRNA2
										ENSG00000164621	4.17931	1.72594	0.125492	13.7534	4.85849e-43	2.79117e-41	ENSG00000164621	SMAD5-AS1
										ENSG00000225602	2.83844	3.64383	0.265009	13.7498	5.10517e-43	2.92605e-41	ENSG00000225602	MTOR-AS1
										ENSG00000235258	2.74177	3.08162	0.224147	13.7482	5.22139e-43	2.98918e-41	ENSG00000235258	NDUFB4P6
										ENSG00000134020	130.758	2.69822	0.196373	13.7402	5.82816e-43	3.32881e-41	ENSG00000134020	PEBP4
										ENSG00000234324	6.06993	1.73798	0.12649	13.74	5.84468e-43	3.33438e-41	ENSG00000234324	RPL9P2
										ENSG00000236274	2.60525	4.07	0.296264	13.7378	6.03157e-43	3.43702e-41	ENSG00000236274	AC004865.1
										ENSG00000279006	4.34628	2.94387	0.214296	13.7374	6.05944e-43	3.44891e-41	ENSG00000279006	AL022323.2
										ENSG00000278972	2.71031	3.92269	0.285556	13.737	6.09233e-43	3.46363e-41	ENSG00000278972	AC015920.1
										ENSG00000245293	5.15895	2.35697	0.171608	13.7346	6.30022e-43	3.57768e-41	ENSG00000245293	AC096564.1
										ENSG00000262470	3.49655	3.21338	0.233968	13.7343	6.32938e-43	3.5901e-41	ENSG00000262470	TVP23CP2
										ENSG00000177374	631.303	1.06881	0.0778267	13.7332	6.4228e-43	3.63471e-41	ENSG00000177374	HIC1
										ENSG00000279461	4.28059	2.00377	0.14592	13.732	6.53103e-43	3.69172e-41	ENSG00000279461	AC005480.2
										ENSG00000259986	2.77507	3.04877	0.222078	13.7284	6.86484e-43	3.87596e-41	ENSG00000259986	AC103876.1
										ENSG00000279570	4.57008	2.6696	0.194487	13.7263	7.06031e-43	3.98176e-41	ENSG00000279570	AC099804.1
										ENSG00000275278	2.56432	3.07811	0.224252	13.7261	7.08244e-43	3.98967e-41	ENSG00000275278	AC012150.2
										ENSG00000167244	7261.95	1.76526	0.128692	13.717	8.03259e-43	4.51457e-41	ENSG00000167244	IGF2
										ENSG00000265204	3.28474	3.36027	0.244984	13.7163	8.109e-43	4.55232e-41	ENSG00000265204	AC090772.2
										ENSG00000270462	4.24716	1.95965	0.142905	13.713	8.48989e-43	4.76072e-41	ENSG00000270462	AC005034.2
										ENSG00000234017	6.42753	1.86674	0.136225	13.7034	9.6931e-43	5.42307e-41	ENSG00000234017	AC022018.1
										ENSG00000174038	5.40192	2.29915	0.167825	13.6996	1.02059e-42	5.69702e-41	ENSG00000174038	C9orf131
										ENSG00000101439	18101.1	1.1905	0.0869048	13.6989	1.03132e-42	5.75042e-41	ENSG00000101439	CST3
										ENSG00000239300	12.5145	1.55849	0.113792	13.696	1.07342e-42	5.97837e-41	ENSG00000239300	AC080162.1
										ENSG00000227773	3.23562	2.93081	0.213996	13.6956	1.07846e-42	5.99963e-41	ENSG00000227773	ASH1L-IT1
										ENSG00000198832	5010.07	1.22075	0.0892051	13.6847	1.25247e-42	6.95983e-41	ENSG00000198832	SELENOM
										ENSG00000258455	2.11131	4.48011	0.327516	13.6791	1.35444e-42	7.51796e-41	ENSG00000258455	AL158801.3
										ENSG00000225978	63.4089	2.33178	0.170494	13.6766	1.4005e-42	7.76487e-41	ENSG00000225978	HAR1A
										ENSG00000235300	4.12395	3.21092	0.234778	13.6764	1.40484e-42	7.78016e-41	ENSG00000235300	AC090627.1
										ENSG00000277558	2.13806	2.93088	0.214315	13.6756	1.42039e-42	7.85749e-41	ENSG00000277558	AL109923.1
										ENSG00000271332	2.51309	3.12783	0.228752	13.6735	1.46216e-42	8.07948e-41	ENSG00000271332	AC023206.1
										ENSG00000095110	2.96914	2.72581	0.199571	13.6583	1.80037e-42	9.90383e-41	ENSG00000095110	NXPE1
										ENSG00000159763	19216.2	3.37742	0.247547	13.6435	2.20615e-42	1.20955e-40	ENSG00000159763	PIP
										ENSG00000228976	2.5199	4.50281	0.330185	13.6373	2.40435e-42	1.31529e-40	ENSG00000228976	SUMO2P8
										ENSG00000226410	2.23566	3.72242	0.27297	13.6367	2.42237e-42	1.32367e-40	ENSG00000226410	AC104058.1
										ENSG00000223583	7.34917	1.5455	0.113353	13.6345	2.49855e-42	1.36379e-40	ENSG00000223583	AL513365.1
										ENSG00000266964	34.3877	1.63581	0.119984	13.6335	2.53142e-42	1.3802e-40	ENSG00000266964	FXYD1
										ENSG00000253168	2.85697	3.7847	0.277694	13.6291	2.6901e-42	1.46348e-40	ENSG00000253168	AC124069.1
										ENSG00000259091	10.9173	1.88951	0.138654	13.6275	2.74719e-42	1.49288e-40	ENSG00000259091	LINC00517
										ENSG00000271533	319.202	1.35682	0.0995947	13.6234	2.90654e-42	1.57774e-40	ENSG00000271533	Z83843.1
										ENSG00000251187	4.7283	2.54871	0.187135	13.6196	3.06219e-42	1.65857e-40	ENSG00000251187	AC010261.2
										ENSG00000213137	2.3197	3.0582	0.224543	13.6197	3.0603e-42	1.65857e-40	ENSG00000213137	ARF1P2
										ENSG00000207082	3.02046	3.67705	0.269993	13.6191	3.08493e-42	1.66905e-40	ENSG00000207082	RNU6-171P
										ENSG00000236863	2.39834	4.24034	0.31136	13.6188	3.09728e-42	1.67389e-40	ENSG00000236863	RPL23AP23
										ENSG00000235619	2.4402	4.27904	0.314238	13.6172	3.16549e-42	1.70888e-40	ENSG00000235619	RPL36AP33
										ENSG00000279281	21.1849	2.47003	0.181403	13.6163	3.20553e-42	1.72671e-40	ENSG00000279281	AC015883.1
										ENSG00000279250	2.56908	3.66629	0.269283	13.615	3.26151e-42	1.75302e-40	ENSG00000279250	AC022919.1
										ENSG00000257246	7.22831	1.82703	0.134197	13.6145	3.28257e-42	1.76242e-40	ENSG00000257246	PHBP19
										ENSG00000126895	60.2509	1.65931	0.121908	13.6112	3.43621e-42	1.8409e-40	ENSG00000126895	AVPR2
										ENSG00000236426	2.84497	2.89872	0.213	13.609	3.53966e-42	1.89426e-40	ENSG00000236426	AL583824.1
										ENSG00000089199	1260.16	3.84128	0.282272	13.6084	3.56915e-42	1.90796e-40	ENSG00000089199	CHGB
										ENSG00000180332	4.97035	3.4823	0.256188	13.5928	4.41969e-42	2.36008e-40	ENSG00000180332	KCTD4
										ENSG00000236095	6.91906	1.92675	0.141758	13.5918	4.47625e-42	2.38769e-40	ENSG00000236095	AL807757.2
										ENSG00000227413	3.85943	2.6033	0.191553	13.5905	4.55986e-42	2.42965e-40	ENSG00000227413	AL022238.1
										ENSG00000259079	2.58622	3.53203	0.259897	13.5901	4.58216e-42	2.4389e-40	ENSG00000259079	AC005476.1
										ENSG00000273100	10.2066	1.61092	0.118688	13.5727	5.81721e-42	3.08959e-40	ENSG00000273100	AL596442.2
										ENSG00000228061	3.86207	2.59418	0.191144	13.5718	5.88393e-42	3.12165e-40	ENSG00000228061	AC131571.1
										ENSG00000234650	5.28887	2.51981	0.185789	13.5628	6.65728e-42	3.52814e-40	ENSG00000234650	PCCA-AS1
										ENSG00000266946	3.0845	2.41242	0.177891	13.5612	6.79989e-42	3.59985e-40	ENSG00000266946	MRPL37P1
										ENSG00000224019	3.21874	2.67699	0.197414	13.5603	6.88366e-42	3.64028e-40	ENSG00000224019	RPL21P32
										ENSG00000255358	2.44137	3.3751	0.248898	13.5602	6.89737e-42	3.64362e-40	ENSG00000255358	AC019227.1
										ENSG00000266538	7.40647	2.06434	0.152246	13.5593	6.981e-42	3.68384e-40	ENSG00000266538	AC005838.2
										ENSG00000188451	8.68823	1.99162	0.146888	13.5588	7.03122e-42	3.70637e-40	ENSG00000188451	SRP72P2
										ENSG00000259048	5.02944	2.52826	0.186503	13.5561	7.2912e-42	3.8352e-40	ENSG00000259048	AL392023.2
										ENSG00000237373	2.57324	3.1893	0.235444	13.5459	8.37872e-42	4.40254e-40	ENSG00000237373	BRWD1-IT1
										ENSG00000189045	21.0565	1.35628	0.100138	13.5441	8.58282e-42	4.50497e-40	ENSG00000189045	ANKDD1B
										ENSG00000251370	2.58069	4.28552	0.316414	13.544	8.594e-42	4.50604e-40	ENSG00000251370	SEMA5A-AS1
										ENSG00000279862	6.76057	2.30521	0.170307	13.5356	9.63688e-42	5.03675e-40	ENSG00000279862	AC092964.1
										ENSG00000251733	4.45215	2.42856	0.179441	13.534	9.84526e-42	5.14021e-40	ENSG00000251733	SCARNA8
										ENSG00000270799	2.33638	4.44195	0.328387	13.5266	1.08984e-41	5.678e-40	ENSG00000270799	AC013467.2
										ENSG00000231310	5.96158	2.48731	0.184014	13.5169	1.24297e-41	6.46212e-40	ENSG00000231310	TBL1XR1-AS1
										ENSG00000236779	2.96063	2.6195	0.193815	13.5155	1.26756e-41	6.58302e-40	ENSG00000236779	AL512306.1
										ENSG00000213050	2.54511	3.38975	0.250859	13.5126	1.3176e-41	6.83571e-40	ENSG00000213050	TPM3P1
										ENSG00000251175	7.65218	1.75599	0.129959	13.5119	1.33017e-41	6.89362e-40	ENSG00000251175	AC008243.1
										ENSG00000151650	60.3418	1.30753	0.0967749	13.511	1.3465e-41	6.97091e-40	ENSG00000151650	VENTX
										ENSG00000231119	31.3035	1.47949	0.109559	13.504	1.4806e-41	7.65714e-40	ENSG00000231119	AL031666.1
										ENSG00000249751	190.422	1.03554	0.076697	13.5017	1.52768e-41	7.89233e-40	ENSG00000249751	ECSCR
										ENSG00000233340	3.17477	5.15483	0.381793	13.5016	1.52951e-41	7.89349e-40	ENSG00000233340	AL139120.1
										ENSG00000240549	3.58707	2.63143	0.194927	13.4996	1.57208e-41	8.10468e-40	ENSG00000240549	THOC7-AS1
										ENSG00000239207	2.59388	3.16956	0.234793	13.4993	1.57763e-41	8.12481e-40	ENSG00000239207	GAPDHP39
										ENSG00000279527	2.44881	3.23656	0.239859	13.4936	1.70547e-41	8.77398e-40	ENSG00000279527	AC073592.7
										ENSG00000235204	11.6976	1.51093	0.111975	13.4935	1.70863e-41	8.78108e-40	ENSG00000235204	AL162724.2
										ENSG00000246477	18.8739	1.61087	0.119383	13.4934	1.7105e-41	8.78151e-40	ENSG00000246477	AF131216.1
										ENSG00000229105	2.95303	3.91961	0.290501	13.4926	1.72955e-41	8.87005e-40	ENSG00000229105	ASTN2-AS1
										ENSG00000274023	2.63977	3.06954	0.227655	13.4833	1.96102e-41	1.00363e-39	ENSG00000274023	AL360169.2
										ENSG00000241738	2.51198	2.74592	0.203658	13.483	1.97027e-41	1.00731e-39	ENSG00000241738	ZNF90P1
										ENSG00000280434	31.8128	1.43409	0.106367	13.4824	1.98434e-41	1.01346e-39	ENSG00000280434	AL031595.3
										ENSG00000232406	18.4282	1.87351	0.138973	13.4811	2.02119e-41	1.03121e-39	ENSG00000232406	AL121895.1
										ENSG00000227056	2.3172	2.65883	0.197363	13.4718	2.29272e-41	1.16853e-39	ENSG00000227056	RPL6P2
										ENSG00000237827	2.4271	3.97551	0.295186	13.4678	2.41953e-41	1.23188e-39	ENSG00000237827	RPS15AP29
										ENSG00000251614	2.05455	3.80832	0.282855	13.4639	2.55182e-41	1.29789e-39	ENSG00000251614	HSPA8P19
										ENSG00000237483	2.05615	4.37095	0.324718	13.4608	2.66156e-41	1.35231e-39	ENSG00000237483	RPS27AP8
										ENSG00000227077	38.29	1.36176	0.101223	13.4531	2.95359e-41	1.49914e-39	ENSG00000227077	AC107983.1
										ENSG00000259591	5.77617	2.62261	0.194963	13.4518	3.00337e-41	1.52128e-39	ENSG00000259591	AC022898.1
										ENSG00000280069	15.2706	1.82189	0.135438	13.4518	3.00285e-41	1.52128e-39	ENSG00000280069	AC127024.8
										ENSG00000230569	2.63293	3.52218	0.261841	13.4516	3.01326e-41	1.52471e-39	ENSG00000230569	AC114763.2
										ENSG00000140287	148.632	2.04143	0.151829	13.4456	3.26711e-41	1.65147e-39	ENSG00000140287	HDC
										ENSG00000276517	52.0717	1.15196	0.0856903	13.4433	3.37281e-41	1.7014e-39	ENSG00000276517	AL133243.3
										ENSG00000231731	61.0114	1.29387	0.0962519	13.4425	3.40526e-41	1.71601e-39	ENSG00000231731	AC010976.1
										ENSG00000267838	47.1691	1.26687	0.0943652	13.4252	4.30237e-41	2.16366e-39	ENSG00000267838	AC245884.8
										ENSG00000223505	9.7424	1.85357	0.138115	13.4205	4.58589e-41	2.30389e-39	ENSG00000223505	AC114402.1
										ENSG00000175602	919.262	1.381	0.102908	13.4198	4.63022e-41	2.3238e-39	ENSG00000175602	CCDC85B
										ENSG00000249112	2.2441	4.46871	0.333068	13.4168	4.82107e-41	2.41466e-39	ENSG00000249112	AC112196.1
										ENSG00000271554	7.36158	1.7553	0.130845	13.4152	4.92829e-41	2.46335e-39	ENSG00000271554	AL138787.2
										ENSG00000233436	8.34199	1.80231	0.134373	13.4128	5.08943e-41	2.54131e-39	ENSG00000233436	BTBD18
										ENSG00000254205	3.32309	3.47451	0.25909	13.4104	5.2521e-41	2.61988e-39	ENSG00000254205	AC009686.1
										ENSG00000271410	2.30613	3.99269	0.297777	13.4083	5.40453e-41	2.69318e-39	ENSG00000271410	AC020728.1
										ENSG00000189099	2.82477	4.09686	0.305605	13.4057	5.59826e-41	2.78485e-39	ENSG00000189099	PRSS48
										ENSG00000234498	119.478	1.15261	0.085979	13.4057	5.59979e-41	2.78485e-39	ENSG00000234498	RPL13AP20
										ENSG00000280080	2.5245	3.34572	0.249601	13.4043	5.70709e-41	2.83535e-39	ENSG00000280080	TBC1D22A-AS1
										ENSG00000224733	2.25866	4.24955	0.317071	13.4025	5.84379e-41	2.90033e-39	ENSG00000224733	AL034349.1
										ENSG00000240729	4.85493	2.20558	0.164662	13.3945	6.50734e-41	3.22316e-39	ENSG00000240729	AC146507.2
										ENSG00000256571	2.78724	3.81797	0.285096	13.3919	6.74643e-41	3.33488e-39	ENSG00000256571	AC079866.2
										ENSG00000225928	2.30654	3.18526	0.237929	13.3874	7.16356e-41	3.53752e-39	ENSG00000225928	CACYBPP1
										ENSG00000225956	3.24994	2.25086	0.168152	13.3859	7.31033e-41	3.60638e-39	ENSG00000225956	AL050320.1
										ENSG00000227911	3.20656	3.46372	0.258797	13.3839	7.50678e-41	3.69959e-39	ENSG00000227911	LINC02344
										ENSG00000253607	3.10816	2.3671	0.176872	13.3831	7.58959e-41	3.73666e-39	ENSG00000253607	AC104316.1
										ENSG00000270606	1.98751	3.31037	0.247369	13.3823	7.67287e-41	3.77388e-39	ENSG00000270606	PPIAP52
										ENSG00000279315	2.74343	2.89161	0.216091	13.3814	7.76405e-41	3.81492e-39	ENSG00000279315	AL158212.4
										ENSG00000265093	2.71942	3.38565	0.253104	13.3765	8.29309e-41	4.07081e-39	ENSG00000265093	RN7SL246P
										ENSG00000228076	2.43498	4.38063	0.327514	13.3754	8.41737e-41	4.1277e-39	ENSG00000228076	AL591719.1
										ENSG00000236051	12.4005	1.51516	0.113282	13.375	8.45987e-41	4.14441e-39	ENSG00000236051	MYCBP2-AS1
										ENSG00000243101	2.55164	2.47701	0.185218	13.3735	8.63578e-41	4.22638e-39	ENSG00000243101	RPS3P7
										ENSG00000251076	2.05251	4.1648	0.31147	13.3714	8.88237e-41	4.34275e-39	ENSG00000251076	AC104126.1
										ENSG00000252473	4.53466	2.26678	0.169544	13.3699	9.06819e-41	4.4292e-39	ENSG00000252473	RF00272
										ENSG00000237872	3.36283	2.80421	0.209746	13.3696	9.10601e-41	4.44326e-39	ENSG00000237872	POU5F1P4
										ENSG00000262402	3.06806	2.6292	0.196834	13.3574	1.07219e-40	5.22655e-39	ENSG00000262402	MCUR1P1
										ENSG00000229241	3.62851	2.63262	0.197103	13.3566	1.08441e-40	5.2809e-39	ENSG00000229241	PNPT1P1
										ENSG00000147896	3.05077	5.35691	0.401091	13.3558	1.09531e-40	5.32868e-39	ENSG00000147896	IFNK
										ENSG00000236535	2.66754	3.89334	0.291511	13.3557	1.09705e-40	5.3319e-39	ENSG00000236535	RC3H1-IT1
										ENSG00000237719	9.83223	1.90749	0.142826	13.3553	1.10294e-40	5.35522e-39	ENSG00000237719	Z95152.1
										ENSG00000231721	285.776	1.03539	0.0775499	13.3513	1.16463e-40	5.64919e-39	ENSG00000231721	LINC-PINT
										ENSG00000280392	7.16222	2.41707	0.181071	13.3488	1.20451e-40	5.83116e-39	ENSG00000280392	AC007496.3
										ENSG00000280039	41.8037	1.50954	0.11317	13.3387	1.37844e-40	6.66008e-39	ENSG00000280039	RN7SKP23
										ENSG00000270429	5.1232	2.31358	0.173496	13.335	1.44829e-40	6.99069e-39	ENSG00000270429	KNOP1P2
										ENSG00000231395	8.19153	2.07333	0.155529	13.3308	1.53231e-40	7.38179e-39	ENSG00000231395	ARL4AP4
										ENSG00000226705	2.12555	3.55899	0.266984	13.3304	1.54143e-40	7.41845e-39	ENSG00000226705	SDCBPP1
										ENSG00000226803	36.9717	1.22685	0.0920712	13.325	1.65637e-40	7.96386e-39	ENSG00000226803	AL136311.1
										ENSG00000164736	204.58	1.18867	0.0892181	13.3232	1.69612e-40	8.14699e-39	ENSG00000164736	SOX17
										ENSG00000260672	5.13076	1.89974	0.14262	13.3203	1.76326e-40	8.46124e-39	ENSG00000260672	AC100827.4
										ENSG00000250321	9.45249	1.49041	0.1119	13.3191	1.79247e-40	8.59302e-39	ENSG00000250321	AC079140.2
										ENSG00000279474	1.90542	3.70166	0.27797	13.3167	1.84989e-40	8.85968e-39	ENSG00000279474	AC125437.2
										ENSG00000182154	2095.54	1.0817	0.0812518	13.3129	1.94787e-40	9.31985e-39	ENSG00000182154	MRPL41
										ENSG00000242175	2.32716	3.83503	0.288075	13.3126	1.95529e-40	9.34628e-39	ENSG00000242175	RN7SL127P
										ENSG00000226876	19.6831	3.15755	0.237254	13.3087	2.0604e-40	9.83916e-39	ENSG00000226876	AC092801.1
										ENSG00000254843	2.95026	3.20693	0.240975	13.3081	2.07633e-40	9.9056e-39	ENSG00000254843	XIAPP2
										ENSG00000271771	2.33213	3.07749	0.231255	13.3078	2.08545e-40	9.93949e-39	ENSG00000271771	AC139792.1
										ENSG00000237307	6.63383	1.96066	0.147334	13.3076	2.09184e-40	9.96031e-39	ENSG00000237307	SRRM1P3
										ENSG00000279432	12.7151	1.66567	0.125231	13.3009	2.28804e-40	1.08735e-38	ENSG00000279432	AC015799.1
										ENSG00000279433	3.65185	2.71445	0.204162	13.2956	2.45632e-40	1.1662e-38	ENSG00000279433	AC018529.3
										ENSG00000260816	27.7936	1.98226	0.149111	13.2938	2.51313e-40	1.19202e-38	ENSG00000260816	AC027279.1
										ENSG00000229999	3.41063	2.54126	0.191191	13.2917	2.58635e-40	1.22557e-38	ENSG00000229999	AL022238.2
										ENSG00000232623	3.71273	2.3737	0.178634	13.288	2.71612e-40	1.28582e-38	ENSG00000232623	AP000266.1
										ENSG00000235522	5.25673	2.12191	0.159691	13.2876	2.73142e-40	1.29182e-38	ENSG00000235522	AC010978.1
										ENSG00000205929	7.74032	1.61104	0.121245	13.2875	2.73634e-40	1.29291e-38	ENSG00000205929	C21orf62
										ENSG00000224490	5.08738	2.33815	0.175969	13.2873	2.74292e-40	1.29477e-38	ENSG00000224490	TTC21B-AS1
										ENSG00000232970	2.14782	3.28596	0.247369	13.2836	2.88146e-40	1.35887e-38	ENSG00000232970	POLHP1
										ENSG00000254577	5.61818	1.59822	0.120335	13.2814	2.96675e-40	1.39641e-38	ENSG00000254577	AC087276.1
										ENSG00000237214	48.1328	1.16637	0.0878213	13.2812	2.97738e-40	1.40008e-38	ENSG00000237214	AL080243.2
										ENSG00000261997	15.4249	1.55671	0.117215	13.2808	2.9906e-40	1.40495e-38	ENSG00000261997	AC007336.1
										ENSG00000261195	6.60277	1.8873	0.142116	13.28	3.0249e-40	1.41971e-38	ENSG00000261195	AC027130.1
										ENSG00000059915	271.427	1.27542	0.0960772	13.275	3.23315e-40	1.51457e-38	ENSG00000059915	PSD
										ENSG00000214761	3.88644	2.33921	0.176257	13.2716	3.3828e-40	1.58166e-38	ENSG00000214761	HNRNPA1P15
										ENSG00000238363	6.7243	1.57424	0.118642	13.2688	3.50972e-40	1.63944e-38	ENSG00000238363	SNORA13
										ENSG00000241111	7.21869	2.16684	0.163355	13.2647	3.71126e-40	1.73195e-38	ENSG00000241111	PRICKLE2-AS1
										ENSG00000265218	15.4068	1.82485	0.137618	13.2602	3.93766e-40	1.83412e-38	ENSG00000265218	AC103810.2
										ENSG00000223525	2.34045	3.10677	0.234306	13.2595	3.97753e-40	1.85094e-38	ENSG00000223525	RABGAP1L-IT1
										ENSG00000234459	14.5364	2.19334	0.165427	13.2586	4.02143e-40	1.86608e-38	ENSG00000234459	AC002064.2
										ENSG00000232729	18.5979	1.72106	0.129859	13.2533	4.31982e-40	2.00077e-38	ENSG00000232729	AC211433.1
										ENSG00000236646	2.32731	3.37046	0.254355	13.251	4.45138e-40	2.05977e-38	ENSG00000236646	LAMTOR5P1
										ENSG00000269929	14.1997	1.80487	0.136221	13.2495	4.54152e-40	2.0995e-38	ENSG00000269929	AL158152.1
										ENSG00000273055	28.3304	1.17426	0.0886321	13.2487	4.59207e-40	2.12088e-38	ENSG00000273055	AC005046.1
										ENSG00000269304	4.51049	2.03598	0.153681	13.2481	4.62603e-40	2.13456e-38	ENSG00000269304	FKBP1AP1
										ENSG00000214671	1.77614	4.21164	0.317969	13.2454	4.79472e-40	2.2062e-38	ENSG00000214671	RPL6P12
										ENSG00000279191	15.0792	1.64579	0.124279	13.2428	4.96869e-40	2.28198e-38	ENSG00000279191	AC068491.4
										ENSG00000225222	3.64061	5.27641	0.398437	13.2428	4.96866e-40	2.28198e-38	ENSG00000225222	CHCHD4P5
										ENSG00000250031	11.9497	1.9903	0.150337	13.2389	5.23065e-40	2.39782e-38	ENSG00000250031	AC009927.1
										ENSG00000225146	2.6455	2.56716	0.193968	13.235	5.51046e-40	2.52374e-38	ENSG00000225146	AC073957.1
										ENSG00000280291	1.91097	4.11704	0.311157	13.2314	5.78228e-40	2.64577e-38	ENSG00000280291	AC016251.2
										ENSG00000231172	1.95393	4.18133	0.316027	13.2309	5.8158e-40	2.65864e-38	ENSG00000231172	AC007099.1
										ENSG00000159761	95.7337	1.06283	0.0803503	13.2274	6.09466e-40	2.78006e-38	ENSG00000159761	C16orf86
										ENSG00000179447	6.04642	2.55035	0.192813	13.2271	6.11948e-40	2.78711e-38	ENSG00000179447	AL049647.1
										ENSG00000234091	3.6774	2.59494	0.196204	13.2257	6.23282e-40	2.8361e-38	ENSG00000234091	AL157392.2
										ENSG00000273437	28.9754	1.11923	0.084632	13.2247	6.31715e-40	2.87183e-38	ENSG00000273437	AC108673.3
										ENSG00000233044	2.31013	4.50268	0.340496	13.2239	6.38907e-40	2.90184e-38	ENSG00000233044	AL049820.1
										ENSG00000223409	3.40786	5.08722	0.384713	13.2234	6.4278e-40	2.91674e-38	ENSG00000223409	RPL17P17
										ENSG00000231726	2.60777	2.94765	0.222967	13.2201	6.71867e-40	3.04312e-38	ENSG00000231726	HMGN2P38
										ENSG00000241003	5.47962	2.21156	0.1673	13.2191	6.80542e-40	3.07958e-38	ENSG00000241003	AC108860.1
										ENSG00000259274	2.77851	2.29683	0.173848	13.2117	7.51227e-40	3.3932e-38	ENSG00000259274	AC107241.1
										ENSG00000272754	3.52514	1.98714	0.150432	13.2096	7.72418e-40	3.48572e-38	ENSG00000272754	AL133245.1
										ENSG00000246922	225.334	1.12519	0.0851808	13.2094	7.74496e-40	3.4919e-38	ENSG00000246922	UBAP1L
										ENSG00000240401	45.7378	1.3339	0.100999	13.207	7.99788e-40	3.60263e-38	ENSG00000240401	AC012358.3
										ENSG00000234174	3.74845	2.25988	0.171122	13.2062	8.0793e-40	3.63598e-38	ENSG00000234174	AC016683.1
										ENSG00000241101	2.13902	3.17489	0.240431	13.205	8.20946e-40	3.69118e-38	ENSG00000241101	PRICKLE2-AS2
										ENSG00000228386	3.17457	3.63388	0.275211	13.204	8.32184e-40	3.7383e-38	ENSG00000228386	AL031668.1
										ENSG00000229694	4.83252	2.21428	0.16775	13.1999	8.7895e-40	3.94478e-38	ENSG00000229694	LINC00484
										ENSG00000229585	3.61049	1.8939	0.143489	13.1989	8.90603e-40	3.99344e-38	ENSG00000229585	RPL21P44
										ENSG00000107281	5696.01	1.12562	0.0853091	13.1946	9.42418e-40	4.22193e-38	ENSG00000107281	NPDC1
										ENSG00000269845	16.5056	1.56151	0.118347	13.1943	9.45939e-40	4.23385e-38	ENSG00000269845	AC092364.2
										ENSG00000254879	2.35443	3.56755	0.270387	13.1942	9.47296e-40	4.23607e-38	ENSG00000254879	PTPRJ-AS1
										ENSG00000256045	6.93304	1.75924	0.133345	13.1931	9.61191e-40	4.29431e-38	ENSG00000256045	MTRNR2L10
										ENSG00000236065	3.21763	2.80905	0.213004	13.1878	1.0318e-39	4.60558e-38	ENSG00000236065	AL020995.1
										ENSG00000213109	2.83718	2.49969	0.18963	13.182	1.11455e-39	4.96595e-38	ENSG00000213109	AL365223.1
										ENSG00000264895	5.74158	2.78116	0.211014	13.18	1.14361e-39	5.09081e-38	ENSG00000264895	AC006141.1
										ENSG00000264270	3.56622	2.66605	0.202411	13.1715	1.28095e-39	5.69628e-38	ENSG00000264270	AC087749.1
										ENSG00000225423	2.94397	2.51034	0.19059	13.1714	1.28193e-39	5.69628e-38	ENSG00000225423	TNPO1P1
										ENSG00000267476	3.08265	2.3698	0.179938	13.1701	1.3043e-39	5.79041e-38	ENSG00000267476	AC104365.1
										ENSG00000258086	4.47428	1.94126	0.147417	13.1686	1.3312e-39	5.89922e-38	ENSG00000258086	AC079313.1
										ENSG00000224972	2.3919	4.29631	0.326418	13.162	1.45266e-39	6.42589e-38	ENSG00000224972	AL513412.1
										ENSG00000213005	2.69573	3.30443	0.25111	13.1593	1.50518e-39	6.64626e-38	ENSG00000213005	PTTG3P
										ENSG00000232875	2.01792	3.36467	0.255719	13.1577	1.53756e-39	6.78316e-38	ENSG00000232875	HMGN2P35
										ENSG00000227512	5.19495	2.25119	0.171133	13.1547	1.59986e-39	7.0517e-38	ENSG00000227512	AL592301.1
										ENSG00000264705	3.4466	2.14162	0.162838	13.1519	1.66045e-39	7.31224e-38	ENSG00000264705	AC090337.1
										ENSG00000109061	22.6629	1.78132	0.135491	13.1472	1.76603e-39	7.77022e-38	ENSG00000109061	MYH1
										ENSG00000235740	3.46455	2.97484	0.226282	13.1466	1.78085e-39	7.82842e-38	ENSG00000235740	PHACTR2-AS1
										ENSG00000279085	2.98689	2.32443	0.176873	13.1418	1.89696e-39	8.32395e-38	ENSG00000279085	AL022323.3
										ENSG00000223442	11.6376	1.48681	0.113179	13.1368	2.02686e-39	8.86237e-38	ENSG00000223442	TH2LCRR
										ENSG00000263477	2.22561	4.10911	0.312841	13.1348	2.08005e-39	9.08689e-38	ENSG00000263477	AC104982.1
										ENSG00000239291	4.11164	1.85175	0.141008	13.1322	2.15307e-39	9.39755e-38	ENSG00000239291	AC002558.1
										ENSG00000007001	13.2041	1.62028	0.123446	13.1254	2.35513e-39	1.02704e-37	ENSG00000007001	UPP2
										ENSG00000235111	6.46561	2.03963	0.155399	13.1252	2.36256e-39	1.02936e-37	ENSG00000235111	Z97192.3
										ENSG00000227383	2.99131	4.18964	0.319331	13.1201	2.52721e-39	1.10013e-37	ENSG00000227383	AL353662.1
										ENSG00000133636	93.0547	4.09177	0.311931	13.1175	2.61249e-39	1.13524e-37	ENSG00000133636	NTS
										ENSG00000234118	14.4319	1.32138	0.100735	13.1174	2.61764e-39	1.13648e-37	ENSG00000234118	RPL13AP6
										ENSG00000259228	2.31416	2.40746	0.183583	13.1137	2.7481e-39	1.19102e-37	ENSG00000259228	HNRNPA1P62
										ENSG00000272523	67.4047	1.24371	0.0948422	13.1135	2.7555e-39	1.19318e-37	ENSG00000272523	LINC01023
										ENSG00000252782	2.8235	2.34744	0.179014	13.1132	2.76727e-39	1.19722e-37	ENSG00000252782	RNU6-341P
										ENSG00000271917	6.59036	2.66604	0.203329	13.1119	2.81316e-39	1.21601e-37	ENSG00000271917	AL357568.2
										ENSG00000234982	6.63136	1.64202	0.125255	13.1095	2.90663e-39	1.25531e-37	ENSG00000234982	AL441963.1
										ENSG00000233668	7.26981	1.63486	0.12472	13.1082	2.95337e-39	1.27438e-37	ENSG00000233668	AL353662.2
										ENSG00000223965	2.19687	3.28793	0.250836	13.1079	2.9658e-39	1.27862e-37	ENSG00000223965	ZNF587P1
										ENSG00000237851	2.21142	3.04065	0.232055	13.1031	3.15879e-39	1.35944e-37	ENSG00000237851	AL023584.2
										ENSG00000277687	34.5035	1.37009	0.10457	13.1021	3.20176e-39	1.37673e-37	ENSG00000277687	AL139407.1
										ENSG00000266767	2.35456	4.36904	0.333484	13.1012	3.24009e-39	1.39078e-37	ENSG00000266767	AP000897.2
										ENSG00000230894	3.46293	3.41572	0.260721	13.101	3.2474e-39	1.39271e-37	ENSG00000230894	AL133284.1
										ENSG00000263924	3.37572	2.32068	0.177162	13.0992	3.32756e-39	1.42584e-37	ENSG00000263924	AC022960.1
										ENSG00000227560	4.1774	2.93473	0.224055	13.0983	3.36885e-39	1.44228e-37	ENSG00000227560	RPS15AP30
										ENSG00000228219	2.21006	3.24333	0.247673	13.0952	3.50604e-39	1.49971e-37	ENSG00000228219	NPM1P30
										ENSG00000266599	1.80649	3.3964	0.259397	13.0934	3.59014e-39	1.53435e-37	ENSG00000266599	AC079336.4
										ENSG00000261630	2.58042	2.94211	0.224767	13.0896	3.77745e-39	1.613e-37	ENSG00000261630	AC007496.2
										ENSG00000261451	5.95689	2.04796	0.15649	13.0869	3.91481e-39	1.67021e-37	ENSG00000261451	AC104964.3
										ENSG00000141933	174.404	1.39959	0.106979	13.0828	4.12777e-39	1.7565e-37	ENSG00000141933	TPGS1
										ENSG00000224451	1.81421	3.90113	0.298209	13.0819	4.17978e-39	1.77709e-37	ENSG00000224451	ATP5PBP1
										ENSG00000258962	4.49069	2.75269	0.210437	13.0808	4.23815e-39	1.80036e-37	ENSG00000258962	AL121839.1
										ENSG00000271049	5.69462	2.15673	0.164942	13.0757	4.53224e-39	1.92362e-37	ENSG00000271049	AC020910.3
										ENSG00000279762	10.4053	1.85846	0.142226	13.067	5.08249e-39	2.15345e-37	ENSG00000279762	AC005899.8
										ENSG00000227227	2.93876	2.82642	0.216305	13.0669	5.09179e-39	2.15554e-37	ENSG00000227227	AC017101.1
										ENSG00000228828	9.00398	1.89714	0.145199	13.0658	5.16507e-39	2.18468e-37	ENSG00000228828	TLK2P2
										ENSG00000257438	3.11683	3.20195	0.245153	13.0611	5.49594e-39	2.32264e-37	ENSG00000257438	AC011595.1
										ENSG00000259276	2.1942	4.56415	0.349531	13.0579	5.72665e-39	2.41806e-37	ENSG00000259276	AC087286.1
										ENSG00000279512	3.63256	2.69755	0.206636	13.0546	5.98188e-39	2.52151e-37	ENSG00000279512	AC011755.1
										ENSG00000242634	2.15568	2.93942	0.225167	13.0544	5.99729e-39	2.52584e-37	ENSG00000242634	RPS24P16
										ENSG00000274441	2.29049	4.26119	0.326478	13.052	6.19153e-39	2.60542e-37	ENSG00000274441	AC008957.2
										ENSG00000235033	48.5553	1.40409	0.107581	13.0515	6.23253e-39	2.62043e-37	ENSG00000235033	AL590999.1
										ENSG00000253932	2.34646	4.69634	0.359862	13.0504	6.32416e-39	2.65442e-37	ENSG00000253932	AC019270.1
										ENSG00000235834	2.6972	3.70245	0.283703	13.0504	6.319e-39	2.65442e-37	ENSG00000235834	Z93022.1
										ENSG00000227213	2.2294	3.31571	0.254108	13.0484	6.48657e-39	2.72027e-37	ENSG00000227213	SPATA13-AS1
										ENSG00000277566	9.40888	1.63581	0.125377	13.0471	6.5972e-39	2.76431e-37	ENSG00000277566	AC089999.2
										ENSG00000030304	7.30707	2.26178	0.173384	13.0449	6.79103e-39	2.84311e-37	ENSG00000030304	MUSK
										ENSG00000271500	5.51781	2.75175	0.211036	13.0392	7.32027e-39	3.05947e-37	ENSG00000271500	AC005183.1
										ENSG00000266598	2.60662	3.4173	0.262175	13.0344	7.79688e-39	3.25591e-37	ENSG00000266598	AC037487.2
										ENSG00000240074	1.71288	3.81584	0.292829	13.0309	8.15894e-39	3.40421e-37	ENSG00000240074	RPL9P30
										ENSG00000254099	3.87992	1.69006	0.129704	13.0301	8.24816e-39	3.43853e-37	ENSG00000254099	AC005740.3
										ENSG00000237223	18.3818	3.40704	0.261535	13.0271	8.58191e-39	3.57464e-37	ENSG00000237223	SULT1C2P1
										ENSG00000239926	4.14811	2.6707	0.205028	13.0261	8.69842e-39	3.6201e-37	ENSG00000239926	PRDX3P4
										ENSG00000230495	4.64807	2.1056	0.161653	13.0255	8.76672e-39	3.64545e-37	ENSG00000230495	AL132765.1
										ENSG00000254112	2.15684	3.954	0.303569	13.025	8.81587e-39	3.66279e-37	ENSG00000254112	AP003467.2
										ENSG00000245534	21.2059	1.3338	0.102408	13.0243	8.90266e-39	3.69573e-37	ENSG00000245534	RORA-AS1
										ENSG00000261253	10.3891	1.43428	0.110132	13.0233	9.0175e-39	3.74025e-37	ENSG00000261253	AC137932.2
										ENSG00000236262	3.53943	3.02339	0.232201	13.0206	9.34815e-39	3.87413e-37	ENSG00000236262	SHANK2-AS2
										ENSG00000216636	2.20463	3.49724	0.268639	13.0184	9.62e-39	3.98344e-37	ENSG00000216636	RPL7P25
										ENSG00000226545	1.8579	4.21857	0.324113	13.0157	9.95899e-39	4.11688e-37	ENSG00000226545	AL357552.1
										ENSG00000252498	16.4989	1.78484	0.137133	13.0154	1.00047e-38	4.13233e-37	ENSG00000252498	RNU6-1016P
										ENSG00000257475	7.18365	1.81631	0.139623	13.0087	1.09185e-38	4.50217e-37	ENSG00000257475	AC068888.2
										ENSG00000230427	1.8368	3.01348	0.231693	13.0063	1.12599e-38	4.63907e-37	ENSG00000230427	AC095033.1
										ENSG00000280248	11.7106	1.62736	0.125126	13.0058	1.13405e-38	4.66838e-37	ENSG00000280248	AC124319.4
										ENSG00000231845	4.31312	2.36213	0.181657	13.0033	1.17244e-38	4.81835e-37	ENSG00000231845	HMGB3P14
										ENSG00000231799	7.1214	1.65826	0.127606	12.9951	1.30383e-38	5.35386e-37	ENSG00000231799	PA2G4P6
										ENSG00000227028	8.35221	2.03934	0.156937	12.9947	1.31177e-38	5.38199e-37	ENSG00000227028	SLC8A1-AS1
										ENSG00000278236	2.77817	2.65788	0.204548	12.9939	1.32459e-38	5.43004e-37	ENSG00000278236	RF02271
										ENSG00000235958	18.9451	1.13778	0.0875633	12.9938	1.32638e-38	5.43286e-37	ENSG00000235958	UBOX5-AS1
										ENSG00000249098	2.4673	4.90213	0.377284	12.9932	1.33711e-38	5.47228e-37	ENSG00000249098	AC055733.1
										ENSG00000167874	98.6121	1.15003	0.0885206	12.9917	1.36448e-38	5.57963e-37	ENSG00000167874	TMEM88
										ENSG00000220842	152.829	1.58277	0.121856	12.9888	1.41619e-38	5.78628e-37	ENSG00000220842	RPL21P16
										ENSG00000232587	14.1459	1.37348	0.10575	12.9881	1.43008e-38	5.83819e-37	ENSG00000232587	EEF1A1P3
										ENSG00000229659	31.7915	1.13639	0.0875043	12.9867	1.45585e-38	5.93849e-37	ENSG00000229659	RPL26P6
										ENSG00000131095	67.5613	2.18939	0.16862	12.9842	1.50457e-38	6.13214e-37	ENSG00000131095	GFAP
										ENSG00000271146	1.96008	4.21872	0.324959	12.9823	1.54125e-38	6.2764e-37	ENSG00000271146	AC018889.1
										ENSG00000238728	2.23891	2.61575	0.201515	12.9804	1.58062e-38	6.43143e-37	ENSG00000238728	MIR1972-1
										ENSG00000249885	9.48346	2.18749	0.168527	12.98	1.58873e-38	6.45907e-37	ENSG00000249885	ARHGEF38-IT1
										ENSG00000226360	95.1975	1.19024	0.0917176	12.9772	1.64725e-38	6.68595e-37	ENSG00000226360	RPL10AP6
										ENSG00000239602	2.41662	2.75022	0.212006	12.9724	1.75525e-38	7.1126e-37	ENSG00000239602	AC091959.2
										ENSG00000232536	10.6549	1.7044	0.131421	12.969	1.83519e-38	7.4304e-37	ENSG00000232536	AL365436.2
										ENSG00000241651	3.04987	2.42788	0.187228	12.9675	1.87004e-38	7.56527e-37	ENSG00000241651	AC099340.1
										ENSG00000268051	2.1666	3.41025	0.262992	12.9671	1.88046e-38	7.60121e-37	ENSG00000268051	AC008395.1
										ENSG00000185958	24.9446	1.29895	0.100176	12.9667	1.89082e-38	7.63679e-37	ENSG00000185958	FAM186A
										ENSG00000185641	258.508	1.25417	0.0967331	12.9652	1.92684e-38	7.77592e-37	ENSG00000185641	AC034236.1
										ENSG00000197245	125.011	1.31456	0.1014	12.964	1.95657e-38	7.88941e-37	ENSG00000197245	FAM110D
										ENSG00000176349	2.30785	3.00448	0.231818	12.9605	2.04836e-38	8.24602e-37	ENSG00000176349	AC104129.1
										ENSG00000279275	7.55867	2.01644	0.155624	12.9571	2.14186e-38	8.61538e-37	ENSG00000279275	AP002505.2
										ENSG00000281026	122.605	1.14117	0.0880764	12.9566	2.1549e-38	8.66076e-37	ENSG00000281026	N4BP2L2-IT2
										ENSG00000226761	2.90451	3.12031	0.240848	12.9555	2.18674e-38	8.78155e-37	ENSG00000226761	TAS2R46
										ENSG00000237757	10.154	1.39459	0.107649	12.9549	2.20353e-38	8.84178e-37	ENSG00000237757	EEF1A1P30
										ENSG00000256682	5.39116	2.12815	0.164287	12.9539	2.23388e-38	8.95625e-37	ENSG00000256682	AC006518.2
										ENSG00000238057	10.3936	1.35996	0.105014	12.9503	2.34084e-38	9.37747e-37	ENSG00000238057	ZEB2-AS1
										ENSG00000240210	2.33306	2.20347	0.170204	12.9461	2.47304e-38	9.89901e-37	ENSG00000240210	AL122013.1
										ENSG00000275017	8.17441	2.19697	0.169713	12.9452	2.50097e-38	1.00026e-36	ENSG00000275017	AL353748.2
										ENSG00000274364	3.45707	2.1	0.162244	12.9435	2.55738e-38	1.022e-36	ENSG00000274364	AL110115.1
										ENSG00000259605	84.1299	1.39284	0.107633	12.9407	2.65285e-38	1.05929e-36	ENSG00000259605	AC074212.1
										ENSG00000254936	4.99935	2.66628	0.206056	12.9396	2.69089e-38	1.07361e-36	ENSG00000254936	AF131215.4
										ENSG00000273521	9.16207	1.52876	0.118178	12.9361	2.81724e-38	1.1222e-36	ENSG00000273521	AL162274.1
										ENSG00000279502	2.17235	4.75974	0.367977	12.9349	2.8603e-38	1.13843e-36	ENSG00000279502	AC016542.2
										ENSG00000226263	4.10194	2.14679	0.165997	12.9327	2.94362e-38	1.1697e-36	ENSG00000226263	ISM1-AS1
										ENSG00000264572	2.05531	4.23447	0.327509	12.9293	3.07512e-38	1.21901e-36	ENSG00000264572	MIR4296
										ENSG00000182376	3.93965	2.07924	0.160881	12.9241	3.29017e-38	1.30216e-36	ENSG00000182376	AC138028.1
										ENSG00000197915	13.7908	1.89814	0.146871	12.9238	3.30286e-38	1.30515e-36	ENSG00000197915	HRNR
										ENSG00000235869	2.46384	3.69176	0.285656	12.9238	3.30304e-38	1.30515e-36	ENSG00000235869	Z99127.2
										ENSG00000200953	4.10128	2.18689	0.169299	12.9174	3.59272e-38	1.41848e-36	ENSG00000200953	RF00019
										ENSG00000275506	4.32669	2.17094	0.168129	12.9124	3.83152e-38	1.51034e-36	ENSG00000275506	AC010378.1
										ENSG00000231794	7.63647	1.67679	0.12988	12.9103	3.93665e-38	1.55053e-36	ENSG00000231794	AC009542.1
										ENSG00000215893	2.15819	4.1325	0.320128	12.9089	4.01024e-38	1.577e-36	ENSG00000215893	RPL23AP17
										ENSG00000272033	4.11708	2.48207	0.192284	12.9084	4.03662e-38	1.5861e-36	ENSG00000272033	AL136984.1
										ENSG00000254432	5.07351	2.48224	0.192377	12.903	4.33054e-38	1.69888e-36	ENSG00000254432	AC113143.1
										ENSG00000239183	2.86189	4.02683	0.312126	12.9013	4.42471e-38	1.73444e-36	ENSG00000239183	SNORA84
										ENSG00000237280	3.09882	2.96741	0.230264	12.887	5.32819e-38	2.08528e-36	ENSG00000237280	AL136982.3
										ENSG00000223724	2.14549	4.19387	0.325502	12.8843	5.51605e-38	2.15367e-36	ENSG00000223724	RAD17P2
										ENSG00000243175	6.03571	1.53589	0.119228	12.8819	5.68947e-38	2.21786e-36	ENSG00000243175	RPSAP36
										ENSG00000201581	2.09692	3.05937	0.237506	12.8812	5.74247e-38	2.23675e-36	ENSG00000201581	RN7SKP78
										ENSG00000230470	3.72685	2.62207	0.20357	12.8804	5.79967e-38	2.25724e-36	ENSG00000230470	AL078645.1
										ENSG00000241429	15.8588	1.34381	0.104336	12.8797	5.85552e-38	2.2739e-36	ENSG00000241429	EEF1A1P25
										ENSG00000252150	7.41625	1.3536	0.105096	12.8797	5.85632e-38	2.2739e-36	ENSG00000252150
										ENSG00000253399	2.78593	2.56727	0.199346	12.8785	5.94915e-38	2.30812e-36	ENSG00000253399	AC078852.1
										ENSG00000278705	7.01262	2.60064	0.202104	12.8678	6.83156e-38	2.6463e-36	ENSG00000278705	HIST1H4B
										ENSG00000258968	2.7178	3.90595	0.303562	12.8671	6.89651e-38	2.66936e-36	ENSG00000258968	AL049830.4
										ENSG00000099998	2601.25	1.04283	0.0810472	12.8669	6.91006e-38	2.6725e-36	ENSG00000099998	GGT5
										ENSG00000271737	30.0215	1.17458	0.0913041	12.8645	7.13216e-38	2.75624e-36	ENSG00000271737	AC008608.2
										ENSG00000228655	5.17169	2.5504	0.1983	12.8613	7.42709e-38	2.86796e-36	ENSG00000228655	AC096558.1
										ENSG00000229696	1.89245	4.39102	0.341467	12.8593	7.62795e-38	2.94322e-36	ENSG00000229696	KARSP1
										ENSG00000233716	3.32395	2.90183	0.225735	12.855	8.06171e-38	3.10815e-36	ENSG00000233716	AC074367.1
										ENSG00000246250	12.0584	1.75389	0.136468	12.852	8.38085e-38	3.22614e-36	ENSG00000246250	AC087521.2
										ENSG00000199872	1.98964	3.91875	0.304982	12.8491	8.70045e-38	3.34393e-36	ENSG00000199872	RNU6-942P
										ENSG00000172889	1754.57	1.26519	0.0984719	12.8483	8.79613e-38	3.37807e-36	ENSG00000172889	EGFL7
										ENSG00000240579	1.54388	3.26705	0.25432	12.8462	9.03105e-38	3.46559e-36	ENSG00000240579	AC006529.1
										ENSG00000278963	7.95414	1.89451	0.147542	12.8405	9.72439e-38	3.72584e-36	ENSG00000278963	AC005921.3
										ENSG00000203647	2.66648	4.82794	0.376136	12.8356	1.03594e-37	3.96606e-36	ENSG00000203647	AC106827.1
										ENSG00000278875	7.60318	1.69586	0.132151	12.8328	1.07452e-37	4.11056e-36	ENSG00000278875	AC025809.2
										ENSG00000248885	1.72542	3.30402	0.257473	12.8325	1.07886e-37	4.12394e-36	ENSG00000248885	AC118465.1
										ENSG00000252549	2.61634	2.73733	0.213346	12.8305	1.10687e-37	4.22773e-36	ENSG00000252549	RNU6-759P
										ENSG00000243007	7.18621	1.28971	0.100522	12.8302	1.11133e-37	4.24148e-36	ENSG00000243007	RPL12P35
										ENSG00000242170	2.28645	3.83611	0.299082	12.8263	1.16839e-37	4.4502e-36	ENSG00000242170	RN7SL329P
										ENSG00000248221	2.222	3.99153	0.3112	12.8263	1.16873e-37	4.4502e-36	ENSG00000248221	STX18-IT1
										ENSG00000253273	2.21984	3.30639	0.25782	12.8244	1.19691e-37	4.55399e-36	ENSG00000253273	AC022826.1
										ENSG00000279985	2.2329	3.83	0.298661	12.8239	1.20475e-37	4.58029e-36	ENSG00000279985	AC008498.2
										ENSG00000259950	2.13063	3.60621	0.281225	12.8232	1.2158e-37	4.61871e-36	ENSG00000259950	AC034105.3
										ENSG00000229601	3.25226	2.65442	0.207012	12.8225	1.22606e-37	4.6541e-36	ENSG00000229601	AL590762.4
										ENSG00000234465	81.8897	1.01133	0.0788815	12.8208	1.2539e-37	4.75613e-36	ENSG00000234465	PINLYP
										ENSG00000279083	1.94291	4.33344	0.338101	12.817	1.31658e-37	4.9862e-36	ENSG00000279083	AL160274.1
										ENSG00000106538	2674.97	1.29249	0.100881	12.812	1.40395e-37	5.30891e-36	ENSG00000106538	RARRES2
										ENSG00000260733	2.81934	3.72067	0.290464	12.8094	1.45276e-37	5.48925e-36	ENSG00000260733	AC046158.1
										ENSG00000253406	5.08643	2.7226	0.212561	12.8086	1.4685e-37	5.54447e-36	ENSG00000253406	AC012613.2
										ENSG00000259201	2.62962	2.28758	0.178608	12.8078	1.48265e-37	5.59362e-36	ENSG00000259201	AC090971.2
										ENSG00000226252	8.4547	1.51489	0.118306	12.8048	1.54208e-37	5.81337e-36	ENSG00000226252	AL135960.1
										ENSG00000213731	3.42797	2.85369	0.222899	12.8026	1.58482e-37	5.96992e-36	ENSG00000213731	RAB5CP1
										ENSG00000239704	44.9334	1.29329	0.101039	12.7999	1.64227e-37	6.17691e-36	ENSG00000239704	CDRT4
										ENSG00000273302	16.1688	1.43853	0.112389	12.7996	1.64897e-37	6.19735e-36	ENSG00000273302	AC016747.3
										ENSG00000227523	2.85032	3.05895	0.238992	12.7994	1.65238e-37	6.20072e-36	ENSG00000227523	RPS20P15
										ENSG00000248125	1.79716	3.85887	0.301518	12.7981	1.6791e-37	6.29618e-36	ENSG00000248125	AC008700.1
										ENSG00000271806	5.66733	1.73176	0.135323	12.7972	1.69875e-37	6.36503e-36	ENSG00000271806	AL590822.2
										ENSG00000228446	9.55185	1.66743	0.130333	12.7936	1.78044e-37	6.66097e-36	ENSG00000228446	AC073052.1
										ENSG00000256789	3.48124	2.35792	0.184321	12.7924	1.80748e-37	6.75698e-36	ENSG00000256789	AP000753.2
										ENSG00000234624	2.1383	2.34746	0.183547	12.7894	1.87897e-37	7.00827e-36	ENSG00000234624	AC016894.1
										ENSG00000163815	383.709	1.30211	0.101893	12.7792	2.14326e-37	7.98798e-36	ENSG00000163815	CLEC3B
										ENSG00000230751	4.19203	2.08277	0.163012	12.7768	2.21099e-37	8.22918e-36	ENSG00000230751	AC007036.2
										ENSG00000269888	22.8266	1.50596	0.117867	12.7767	2.21132e-37	8.22918e-36	ENSG00000269888	AC112491.1
										ENSG00000260558	2.77508	2.43473	0.190561	12.7767	2.21396e-37	8.2328e-36	ENSG00000260558	AC018557.2
										ENSG00000265735	6.88411	2.20734	0.172816	12.7728	2.32732e-37	8.64779e-36	ENSG00000265735	RN7SL5P
										ENSG00000248100	3.60536	3.31317	0.259427	12.7711	2.3775e-37	8.82758e-36	ENSG00000248100	AC087257.1
										ENSG00000254588	1.57799	3.97444	0.311353	12.7651	2.56949e-37	9.52609e-36	ENSG00000254588	AP003397.1
										ENSG00000264829	2.04052	3.29687	0.258328	12.7623	2.66078e-37	9.84967e-36	ENSG00000264829	AC087749.2
										ENSG00000217488	2.74802	4.08207	0.319923	12.7595	2.75865e-37	1.02043e-35	ENSG00000217488	AL356057.1
										ENSG00000233583	2.0482	3.46016	0.271291	12.7544	2.9459e-37	1.08888e-35	ENSG00000233583	AL356273.1
										ENSG00000230749	1.56589	2.66741	0.209154	12.7533	2.98681e-37	1.10317e-35	ENSG00000230749	MEIS1-AS2
										ENSG00000241438	2.71701	2.37382	0.186146	12.7525	3.01988e-37	1.11455e-35	ENSG00000241438	TDGF1P6
										ENSG00000235967	2.35399	4.57455	0.358823	12.7488	3.16674e-37	1.16788e-35	ENSG00000235967	COX5BP3
										ENSG00000269506	2.03268	3.77992	0.29651	12.748	3.19795e-37	1.1785e-35	ENSG00000269506	AC110792.2
										ENSG00000238554	5.66228	5.72672	0.449341	12.7447	3.33634e-37	1.22858e-35	ENSG00000238554	RNU1-88P
										ENSG00000252269	2.61941	3.37677	0.264967	12.7441	3.36328e-37	1.2373e-35	ENSG00000252269	RNU4ATAC12P
										ENSG00000130653	874.465	1.1873	0.0931742	12.7428	3.41854e-37	1.25603e-35	ENSG00000130653	PNPLA7
										ENSG00000279636	16.3661	1.54168	0.121008	12.7403	3.53187e-37	1.2967e-35	ENSG00000279636	AL132989.2
										ENSG00000235018	2.32536	3.17281	0.249057	12.7393	3.57566e-37	1.3118e-35	ENSG00000235018	AL137077.1
										ENSG00000235397	7.4819	2.0359	0.159824	12.7384	3.61797e-37	1.32535e-35	ENSG00000235397	EPN2-AS1
										ENSG00000178473	11.1748	5.80765	0.456095	12.7334	3.8557e-37	1.41139e-35	ENSG00000178473	UCN3
										ENSG00000234933	1.97905	2.97452	0.233613	12.7327	3.89276e-37	1.42389e-35	ENSG00000234933	CDC42P1
										ENSG00000225084	2.31826	4.5515	0.357626	12.727	4.18674e-37	1.53029e-35	ENSG00000225084	AL450226.1
										ENSG00000238008	1.41664	3.60009	0.282888	12.7262	4.23016e-37	1.54501e-35	ENSG00000238008	COX6CP10
										ENSG00000279080	18.9233	1.35715	0.106728	12.7159	4.82519e-37	1.75583e-35	ENSG00000279080	AL022322.2
										ENSG00000221491	5.62001	2.10757	0.16575	12.7154	4.85853e-37	1.76665e-35	ENSG00000221491	SNORA2C
										ENSG00000172209	6.2655	2.35264	0.185063	12.7127	5.02965e-37	1.82753e-35	ENSG00000172209	GPR22
										ENSG00000268189	56.5165	1.13484	0.0892789	12.7112	5.12525e-37	1.85952e-35	ENSG00000268189	AC005785.1
										ENSG00000279816	3.26827	2.33029	0.183347	12.7097	5.22156e-37	1.89306e-35	ENSG00000279816
										ENSG00000263787	3.81578	2.20125	0.17322	12.7078	5.34887e-37	1.93779e-35	ENSG00000263787	SKAP1-AS1
										ENSG00000262529	4.98093	2.56494	0.20184	12.7078	5.35413e-37	1.93827e-35	ENSG00000262529	AC130650.1
										ENSG00000256025	3.01535	5.19683	0.408999	12.7062	5.46081e-37	1.97544e-35	ENSG00000256025	CACNA1C-AS4
										ENSG00000234263	5.41116	1.71125	0.134732	12.7012	5.82452e-37	2.10331e-35	ENSG00000234263	AL024508.1
										ENSG00000277116	2.2187	3.16066	0.248902	12.6984	6.03289e-37	2.17599e-35	ENSG00000277116
										ENSG00000242992	13.6957	1.42243	0.11202	12.6979	6.07207e-37	2.18852e-35	ENSG00000242992	FTH1P4
										ENSG00000231104	6.88998	2.05302	0.16172	12.6949	6.30766e-37	2.27177e-35	ENSG00000231104	AC022395.1
										ENSG00000269950	2.12392	4.04691	0.318822	12.6933	6.43982e-37	2.31768e-35	ENSG00000269950	AP000962.1
										ENSG00000267587	2.19651	3.577	0.281921	12.688	6.89416e-37	2.47757e-35	ENSG00000267587	AC090241.1
										ENSG00000127364	38.5031	1.2885	0.101582	12.6843	7.22849e-37	2.59393e-35	ENSG00000127364	TAS2R4
										ENSG00000128652	27.781	1.25627	0.0990799	12.6794	7.69104e-37	2.75791e-35	ENSG00000128652	HOXD3
										ENSG00000230734	24.1514	1.21554	0.0959058	12.6743	8.21284e-37	2.94287e-35	ENSG00000230734	RPL10P3
										ENSG00000279129	8.35891	2.62094	0.206851	12.6707	8.59887e-37	3.07672e-35	ENSG00000279129	AC046158.3
										ENSG00000270108	21.813	1.28465	0.10139	12.6704	8.62488e-37	3.08379e-35	ENSG00000270108	AL049840.5
										ENSG00000222007	2.76255	4.09778	0.323468	12.6682	8.86725e-37	3.16814e-35	ENSG00000222007	AC064874.1
										ENSG00000227176	5.77293	1.67729	0.132425	12.6659	9.1376e-37	3.26237e-35	ENSG00000227176	AC092641.1
										ENSG00000259632	2.1041	3.10176	0.244909	12.665	9.24768e-37	3.29718e-35	ENSG00000259632	AC090971.4
										ENSG00000224238	13.3285	1.83488	0.144879	12.6649	9.24849e-37	3.29718e-35	ENSG00000224238	WARS2-IT1
										ENSG00000160801	113.516	1.33295	0.105251	12.6645	9.30172e-37	3.31375e-35	ENSG00000160801	PTH1R
										ENSG00000173124	7.29982	2.50485	0.197808	12.663	9.48046e-37	3.37255e-35	ENSG00000173124	ACSM6
										ENSG00000259649	3.44503	1.70202	0.134452	12.6589	9.98598e-37	3.54726e-35	ENSG00000259649	AC027808.2
										ENSG00000260601	2.56016	3.28202	0.259307	12.6569	1.02453e-36	3.63675e-35	ENSG00000260601	AC131391.1
										ENSG00000269948	7.57239	1.60743	0.127008	12.6561	1.03504e-36	3.67141e-35	ENSG00000269948
										ENSG00000277130	6.06818	1.66548	0.131596	12.656	1.03648e-36	3.67387e-35	ENSG00000277130	AC073569.3
										ENSG00000232978	1.92414	3.47001	0.274353	12.648	1.14821e-36	4.06697e-35	ENSG00000232978	AL161909.2
										ENSG00000233025	16.8293	1.65433	0.130838	12.6441	1.20586e-36	4.26811e-35	ENSG00000233025	CRYZP1
										ENSG00000207034	4.09352	2.20806	0.174689	12.6399	1.27138e-36	4.49679e-35	ENSG00000207034	RF00019
										ENSG00000268992	2.43776	3.1711	0.250988	12.6345	1.36263e-36	4.81262e-35	ENSG00000268992	CDC42EP3P1
										ENSG00000256243	1.54866	2.90203	0.229753	12.6311	1.4228e-36	5.02152e-35	ENSG00000256243	RPL7AP3
										ENSG00000255040	2.38344	2.57	0.203667	12.6186	1.66718e-36	5.87558e-35	ENSG00000255040	MORF4L1P3
										ENSG00000271064	5.12992	1.89035	0.149862	12.614	1.76817e-36	6.22703e-35	ENSG00000271064	AC027644.2
										ENSG00000235731	2.06107	3.61399	0.286653	12.6075	1.91888e-36	6.74814e-35	ENSG00000235731	LINC02250
										ENSG00000232757	3.46614	1.95479	0.15507	12.6059	1.95959e-36	6.8864e-35	ENSG00000232757	ETF1P1
										ENSG00000129946	1251.58	1.33401	0.105832	12.605	1.98174e-36	6.95926e-35	ENSG00000129946	SHC2
										ENSG00000231697	2.15168	3.54446	0.281381	12.5966	2.20343e-36	7.73228e-35	ENSG00000231697	NANOGP5
										ENSG00000247473	3.96895	2.12213	0.168477	12.596	2.2218e-36	7.79118e-35	ENSG00000247473	CARS-AS1
										ENSG00000229190	3.27328	2.20367	0.174953	12.5958	2.22689e-36	7.80016e-35	ENSG00000229190	AC069542.1
										ENSG00000278949	22.7566	1.43095	0.113605	12.5958	2.22753e-36	7.80016e-35	ENSG00000278949	AC127070.4
										ENSG00000231564	1.46086	3.46803	0.275342	12.5954	2.23857e-36	7.83326e-35	ENSG00000231564	EIF4A1P11
										ENSG00000245148	15.2482	1.65912	0.131794	12.5887	2.43652e-36	8.50777e-35	ENSG00000245148	ARAP1-AS2
										ENSG00000228540	2.80742	2.33183	0.185238	12.5883	2.44768e-36	8.54067e-35	ENSG00000228540	AC073326.1
										ENSG00000279541	54.9739	1.43444	0.113975	12.5856	2.5352e-36	8.83354e-35	ENSG00000279541	AC005261.5
										ENSG00000225527	6.69262	1.61979	0.128738	12.5821	2.65021e-36	9.22123e-35	ENSG00000225527	AL450384.1
										ENSG00000217897	2.20514	2.36538	0.187996	12.5821	2.64879e-36	9.22123e-35	ENSG00000217897	HSPE1P8
										ENSG00000277541	3.35836	2.35996	0.187636	12.5773	2.81374e-36	9.77639e-35	ENSG00000277541	ZNF630-AS1
										ENSG00000184357	17.6701	2.15231	0.171151	12.5755	2.87797e-36	9.99251e-35	ENSG00000184357	HIST1H1B
										ENSG00000139797	2.62914	3.09123	0.24585	12.5736	2.94877e-36	1.02311e-34	ENSG00000139797	RNF113B
										ENSG00000229992	2.03456	3.4134	0.271511	12.5718	3.01597e-36	1.04569e-34	ENSG00000229992	HMGB3P9
										ENSG00000201302	19.9863	1.15665	0.0920107	12.5708	3.05654e-36	1.05901e-34	ENSG00000201302	SNORA65
										ENSG00000225703	2.14543	3.28769	0.261551	12.5699	3.08942e-36	1.06965e-34	ENSG00000225703	AC114737.1
										ENSG00000270072	1.70835	3.25112	0.258653	12.5694	3.10882e-36	1.07561e-34	ENSG00000270072	AC090559.2
										ENSG00000256222	8.46119	1.84911	0.147138	12.5672	3.20053e-36	1.10579e-34	ENSG00000256222	MTRNR2L3
										ENSG00000267016	5.26454	2.23377	0.177838	12.5607	3.47189e-36	1.1987e-34	ENSG00000267016	AC111170.1
										ENSG00000266100	2.55672	4.30253	0.342587	12.5589	3.55081e-36	1.22509e-34	ENSG00000266100	AC007431.2
										ENSG00000270874	2.47768	3.70827	0.295346	12.5557	3.69956e-36	1.27463e-34	ENSG00000270874	RPAP2P1
										ENSG00000006283	88.2967	1.73208	0.13804	12.5476	4.09691e-36	1.41054e-34	ENSG00000006283	CACNA1G
										ENSG00000280274	3.31603	2.58375	0.205959	12.5449	4.23768e-36	1.45799e-34	ENSG00000280274	AC009145.4
										ENSG00000263499	4.84571	2.47897	0.19762	12.5441	4.28156e-36	1.47103e-34	ENSG00000263499	AC007431.1
										ENSG00000274290	24.8613	1.78007	0.141906	12.544	4.28874e-36	1.47247e-34	ENSG00000274290	HIST1H2BE
										ENSG00000205644	1.80561	2.83895	0.226334	12.5432	4.33172e-36	1.48619e-34	ENSG00000205644	AC025186.1
										ENSG00000225751	3.96786	2.30602	0.183866	12.5419	4.40554e-36	1.51046e-34	ENSG00000225751	AC087501.1
										ENSG00000241684	36.7024	1.62651	0.12972	12.5386	4.59231e-36	1.57231e-34	ENSG00000241684	ADAMTS9-AS2
										ENSG00000228768	1.96825	2.68629	0.214277	12.5365	4.71176e-36	1.61208e-34	ENSG00000228768	AC003101.1
										ENSG00000226984	1.90325	3.29113	0.26255	12.5353	4.7881e-36	1.63706e-34	ENSG00000226984	AL035410.1
										ENSG00000247982	139.175	1.34469	0.107278	12.5347	4.82192e-36	1.64748e-34	ENSG00000247982	LINC00926
										ENSG00000256134	2.12089	2.99502	0.239071	12.5278	5.26204e-36	1.79537e-34	ENSG00000256134	EGLN3P1
										ENSG00000157782	31.8291	1.05475	0.0841946	12.5275	5.27897e-36	1.7999e-34	ENSG00000157782	CABP1
										ENSG00000099840	110.297	1.15571	0.0922566	12.5271	5.30738e-36	1.80833e-34	ENSG00000099840	IZUMO4
										ENSG00000225715	2.22974	2.96778	0.237239	12.5097	6.61065e-36	2.24616e-34	ENSG00000225715	AL512504.1
										ENSG00000274064	1.90591	3.61818	0.289246	12.509	6.66361e-36	2.26259e-34	ENSG00000274064	AC040978.1
										ENSG00000235481	7.7321	1.73919	0.139067	12.5061	6.9099e-36	2.3446e-34	ENSG00000235481	UBE2R2-AS1
										ENSG00000274554	11.4175	1.64216	0.131309	12.5061	6.91719e-36	2.34546e-34	ENSG00000274554	AC083806.2
										ENSG00000225078	1.55416	3.52865	0.282157	12.506	6.92245e-36	2.34563e-34	ENSG00000225078	AL365338.1
										ENSG00000280515	2.60678	2.67821	0.214184	12.5043	7.0755e-36	2.39584e-34	ENSG00000280515	SALRNA2
										ENSG00000232768	1.77084	3.82301	0.305754	12.5036	7.13856e-36	2.41553e-34	ENSG00000232768	AL356320.1
										ENSG00000228423	2.43452	3.61811	0.289431	12.5008	7.39381e-36	2.49675e-34	ENSG00000228423	AL357552.2
										ENSG00000236194	7.92216	1.93672	0.154936	12.5001	7.45119e-36	2.51441e-34	ENSG00000236194	AC099811.1
										ENSG00000249138	4.39438	2.49426	0.199549	12.4995	7.50932e-36	2.53229e-34	ENSG00000249138	AC084871.1
										ENSG00000275714	9.47549	2.15194	0.172187	12.4977	7.6826e-36	2.58895e-34	ENSG00000275714	HIST1H3A
										ENSG00000274591	2.42793	2.65543	0.212527	12.4946	7.99306e-36	2.68988e-34	ENSG00000274591	AC025031.3
										ENSG00000223973	1.63029	3.43766	0.275143	12.4941	8.03972e-36	2.70374e-34	ENSG00000223973	AC068491.1
										ENSG00000267491	2.82712	2.69065	0.2154	12.4914	8.3185e-36	2.79558e-34	ENSG00000267491	AC100788.1
										ENSG00000259463	1.95031	4.05455	0.324922	12.4786	9.77457e-36	3.27821e-34	ENSG00000259463	AC020661.2
										ENSG00000278546	9.45246	1.59169	0.127565	12.4775	9.9046e-36	3.31956e-34	ENSG00000278546	AC003101.2
										ENSG00000238198	20.8488	1.2057	0.0966609	12.4735	1.042e-35	3.48993e-34	ENSG00000238198	AL357055.3
										ENSG00000234937	8.10275	1.52708	0.122433	12.4728	1.05069e-35	3.51662e-34	ENSG00000234937	AL139128.1
										ENSG00000276359	2.7391	4.25647	0.341297	12.4715	1.06838e-35	3.571e-34	ENSG00000276359	RF00017
										ENSG00000214548	1115.97	1.39961	0.112238	12.47	1.08793e-35	3.63386e-34	ENSG00000214548	MEG3
										ENSG00000277548	12.233	1.08772	0.0872572	12.4656	1.14979e-35	3.83527e-34	ENSG00000277548	AC018926.3
										ENSG00000237892	12.3558	1.7442	0.139926	12.4651	1.1571e-35	3.85704e-34	ENSG00000237892	KLF7-IT1
										ENSG00000279071	3.45035	2.12421	0.170515	12.4576	1.27068e-35	4.22992e-34	ENSG00000279071	AC073592.3
										ENSG00000258302	34.3185	1.20388	0.0966471	12.4565	1.28921e-35	4.28581e-34	ENSG00000258302	AC025034.1
										ENSG00000206651	3.6607	2.33621	0.187578	12.4546	1.3196e-35	4.38094e-34	ENSG00000206651	RF00019
										ENSG00000224007	2.72974	4.82534	0.387488	12.4529	1.34892e-35	4.47225e-34	ENSG00000224007	AC019070.1
										ENSG00000261736	2.27174	2.48706	0.199748	12.451	1.38178e-35	4.57503e-34	ENSG00000261736	AC002551.1
										ENSG00000215720	2.37731	3.26467	0.262234	12.4495	1.40744e-35	4.65686e-34	ENSG00000215720	AL035405.1
										ENSG00000252118	1.5159	3.48967	0.280334	12.4483	1.4293e-35	4.726e-34	ENSG00000252118	RNU6ATAC39P
										ENSG00000258373	2.01623	2.52139	0.202583	12.4462	1.46638e-35	4.84536e-34	ENSG00000258373	SLC25A3P2
										ENSG00000273035	6.02072	1.58611	0.127448	12.4452	1.48458e-35	4.90221e-34	ENSG00000273035	AC007684.1
										ENSG00000260171	1.96734	3.46696	0.278593	12.4446	1.49713e-35	4.94033e-34	ENSG00000260171	AC008269.2
										ENSG00000230482	2.01082	3.17058	0.25478	12.4444	1.49976e-35	4.94321e-34	ENSG00000230482	ATP5MC2P3
										ENSG00000120341	13.5291	1.29074	0.10372	12.4444	1.50001e-35	4.94321e-34	ENSG00000120341	SEC16B
										ENSG00000272321	4.78161	2.23319	0.179463	12.4437	1.51245e-35	4.98086e-34	ENSG00000272321	AP003355.2
										ENSG00000253475	3.92221	2.64959	0.212927	12.4436	1.51465e-35	4.98479e-34	ENSG00000253475	AC103769.1
										ENSG00000225224	5.93472	1.45956	0.117307	12.4423	1.54077e-35	5.06397e-34	ENSG00000225224	RPS27AP12
										ENSG00000230993	4.30533	1.41255	0.113594	12.4351	1.68562e-35	5.53265e-34	ENSG00000230993	RPL12P15
										ENSG00000235641	7.5422	2.08771	0.167902	12.4341	1.70575e-35	5.59501e-34	ENSG00000235641	LINC00484
										ENSG00000259202	2.17327	4.49304	0.361586	12.4259	1.89049e-35	6.18858e-34	ENSG00000259202	AC012568.1
										ENSG00000213484	1.83379	3.12022	0.251143	12.4241	1.93503e-35	6.3218e-34	ENSG00000213484	EIF4A1P8
										ENSG00000237359	2.73523	2.7967	0.225145	12.4218	1.99073e-35	6.49944e-34	ENSG00000237359	AL354977.2
										ENSG00000152082	4139.78	1.11456	0.0897282	12.4215	1.99665e-35	6.51445e-34	ENSG00000152082	MZT2B
										ENSG00000270893	2.5796	4.87186	0.39225	12.4203	2.02851e-35	6.61402e-34	ENSG00000270893	AC008277.2
										ENSG00000216813	1.76169	3.54705	0.285638	12.418	2.08705e-35	6.80039e-34	ENSG00000216813	AL358178.1
										ENSG00000257953	4.70776	1.87468	0.150976	12.4171	2.11181e-35	6.87196e-34	ENSG00000257953	AC083805.2
										ENSG00000179094	2305.09	1.12027	0.0902205	12.4171	2.11165e-35	6.87196e-34	ENSG00000179094	PER1
										ENSG00000258571	3.08111	2.24304	0.180662	12.4157	2.14922e-35	6.98909e-34	ENSG00000258571	PTTG4P
										ENSG00000247925	4.38439	2.09124	0.168532	12.4086	2.34644e-35	7.61534e-34	ENSG00000247925	AL139807.1
										ENSG00000255203	2.31196	3.35701	0.270592	12.4061	2.42041e-35	7.85022e-34	ENSG00000255203	OR7E2P
										ENSG00000254531	203.622	1.11655	0.0900135	12.4043	2.47764e-35	8.03056e-34	ENSG00000254531	AP001816.1
										ENSG00000260439	9.77616	1.537	0.123925	12.4027	2.52731e-35	8.18616e-34	ENSG00000260439	LMF1-AS1
										ENSG00000225900	2.34063	4.85889	0.391833	12.4004	2.59989e-35	8.41572e-34	ENSG00000225900	HSPE1P13
										ENSG00000235286	3.42205	2.04041	0.164556	12.3995	2.62928e-35	8.50525e-34	ENSG00000235286	AP000925.1
										ENSG00000200394	3.43621	2.38476	0.192391	12.3953	2.76951e-35	8.94711e-34	ENSG00000200394	SNORA38B
										ENSG00000225076	1.93096	3.13185	0.252814	12.388	3.03635e-35	9.79632e-34	ENSG00000225076	WWC3-AS1
										ENSG00000240233	2.30769	2.59318	0.209354	12.3866	3.08878e-35	9.95241e-34	ENSG00000240233	RN7SL587P
										ENSG00000234500	31.0533	1.06529	0.0860152	12.3849	3.153e-35	1.01527e-33	ENSG00000234500	AC008267.3
										ENSG00000219608	2.54458	2.7351	0.220891	12.3821	3.26671e-35	1.0512e-33	ENSG00000219608	HIGD1AP16
										ENSG00000271278	1.73309	3.87761	0.313188	12.3811	3.30753e-35	1.06364e-33	ENSG00000271278	ELOCP33
										ENSG00000261872	2.38754	2.59658	0.209722	12.381	3.31036e-35	1.06385e-33	ENSG00000261872	AC002558.2
										ENSG00000279996	2.38795	3.71312	0.299978	12.378	3.43925e-35	1.10383e-33	ENSG00000279996	AC004491.1
										ENSG00000225051	30.5272	1.07598	0.0869493	12.3748	3.57835e-35	1.14773e-33	ENSG00000225051	HMGB3P22
										ENSG00000253911	2.14417	3.35075	0.270788	12.3741	3.61115e-35	1.15749e-33	ENSG00000253911	AP003467.1
										ENSG00000212124	13.1565	1.64509	0.132954	12.3734	3.6403e-35	1.16608e-33	ENSG00000212124	TAS2R19
										ENSG00000265293	6.84158	1.96912	0.159238	12.3659	3.997e-35	1.27702e-33	ENSG00000265293	ARGFXP2
										ENSG00000267532	74.2091	1.06234	0.0859113	12.3655	4.01592e-35	1.28223e-33	ENSG00000267532	MIR497HG
										ENSG00000153802	10.7523	2.75123	0.222502	12.365	4.04422e-35	1.29033e-33	ENSG00000153802	TMPRSS11D
										ENSG00000200785	1.81175	3.47569	0.281101	12.3645	4.06565e-35	1.29559e-33	ENSG00000200785	SNORD8
										ENSG00000276410	4.19629	2.8211	0.228207	12.362	4.19408e-35	1.33565e-33	ENSG00000276410	HIST1H2BB
										ENSG00000270832	1.90913	4.1357	0.334569	12.3613	4.23337e-35	1.34729e-33	ENSG00000270832	AC092120.2
										ENSG00000171671	3.65693	3.34393	0.270567	12.359	4.35686e-35	1.3848e-33	ENSG00000171671	SHANK2-AS3
										ENSG00000248521	1.79209	3.51327	0.284306	12.3573	4.44594e-35	1.4122e-33	ENSG00000248521	AC092612.1
										ENSG00000253811	2.47038	5.31451	0.430101	12.3564	4.49835e-35	1.42793e-33	ENSG00000253811	AC136424.2
										ENSG00000219133	6.84838	1.31646	0.106559	12.3543	4.61949e-35	1.46544e-33	ENSG00000219133	AL592114.1
										ENSG00000231831	14.5354	1.5382	0.124512	12.3539	4.64055e-35	1.47117e-33	ENSG00000231831	MTHFD1P1
										ENSG00000251579	1.97259	4.48652	0.3632	12.3528	4.70736e-35	1.49043e-33	ENSG00000251579	AC055733.3
										ENSG00000243053	2.03317	3.18484	0.257828	12.3526	4.71577e-35	1.49213e-33	ENSG00000243053	RPL31P58
										ENSG00000244730	2.68381	4.69503	0.380091	12.3524	4.72891e-35	1.49533e-33	ENSG00000244730	AC139451.1
										ENSG00000231329	10.7537	1.66316	0.134661	12.3507	4.82723e-35	1.52446e-33	ENSG00000231329	AL031772.1
										ENSG00000199683	1.70146	3.86759	0.313186	12.3492	4.92078e-35	1.55301e-33	ENSG00000199683	RN7SKP185
										ENSG00000279957	1.97337	3.66657	0.29691	12.3491	4.92608e-35	1.55369e-33	ENSG00000279957	AC110769.3
										ENSG00000253385	3.12318	3.03518	0.245852	12.3456	5.14671e-35	1.62224e-33	ENSG00000253385	AP003696.1
										ENSG00000201428	3.05023	5.48538	0.444334	12.3452	5.17254e-35	1.62933e-33	ENSG00000201428	RN7SKP71
										ENSG00000240392	3.71545	1.56864	0.127097	12.3421	5.37369e-35	1.69161e-33	ENSG00000240392	RPL9P3
										ENSG00000207612	2.08209	3.94613	0.319785	12.34	5.51821e-35	1.73489e-33	ENSG00000207612	MIR604
										ENSG00000127362	5.77486	2.36568	0.191743	12.3378	5.66916e-35	1.78007e-33	ENSG00000127362	TAS2R3
										ENSG00000227081	346.191	1.29565	0.105022	12.337	5.72686e-35	1.79704e-33	ENSG00000227081	AC005912.1
										ENSG00000248449	13.1817	1.77657	0.144007	12.3367	5.74457e-35	1.80145e-33	ENSG00000248449	PCDHGB8P
										ENSG00000213197	2.76718	2.02525	0.164195	12.3344	5.9129e-35	1.85306e-33	ENSG00000213197	AC012066.1
										ENSG00000270314	1.80435	3.53526	0.286679	12.3318	6.10879e-35	1.91323e-33	ENSG00000270314	AC007161.2
										ENSG00000222020	24.7421	1.22562	0.0994132	12.3286	6.35537e-35	1.98793e-33	ENSG00000222020	AC062017.1
										ENSG00000249140	3.04443	2.22429	0.180465	12.3254	6.61502e-35	2.06652e-33	ENSG00000249140	PRDX2P3
										ENSG00000235262	2.29969	2.41036	0.195681	12.3178	7.2651e-35	2.26673e-33	ENSG00000235262	KDM5C-IT1
										ENSG00000199805	1.63375	3.02355	0.245483	12.3167	7.36046e-35	2.29503e-33	ENSG00000199805	RNU1-134P
										ENSG00000261083	14.4922	1.84961	0.150202	12.3142	7.59814e-35	2.36764e-33	ENSG00000261083	LINC02516
										ENSG00000270739	2.49366	3.07573	0.249818	12.3119	7.81685e-35	2.43271e-33	ENSG00000270739	AC090953.1
										ENSG00000243313	1.80352	4.01957	0.326483	12.3117	7.8342e-35	2.43657e-33	ENSG00000243313	RN7SL285P
										ENSG00000272078	75.0579	1.03714	0.0842482	12.3106	7.94698e-35	2.46853e-33	ENSG00000272078	AL139423.1
										ENSG00000217512	2.31484	3.12228	0.253772	12.3035	8.6715e-35	2.69019e-33	ENSG00000217512	AL356776.1
										ENSG00000206650	2.07738	4.43365	0.360378	12.3028	8.75053e-35	2.71299e-33	ENSG00000206650	SNORA70G
										ENSG00000250869	4.49403	2.15866	0.175471	12.3021	8.82763e-35	2.73518e-33	ENSG00000250869	AC087359.1
										ENSG00000266965	3.16494	4.32044	0.351205	12.3018	8.8617e-35	2.74401e-33	ENSG00000266965	AC090220.1
										ENSG00000259161	1.71033	3.98158	0.323676	12.3011	8.93154e-35	2.76389e-33	ENSG00000259161	AL137779.3
										ENSG00000232015	1.56669	3.77914	0.307304	12.2977	9.31653e-35	2.87941e-33	ENSG00000232015	HSPE1P25
										ENSG00000281855	5.80357	2.26024	0.183799	12.2974	9.35746e-35	2.89024e-33	ENSG00000281855
										ENSG00000271709	2.57647	1.95508	0.158986	12.2972	9.37852e-35	2.89493e-33	ENSG00000271709	AC017033.1
										ENSG00000225300	3.57643	2.39552	0.194807	12.2969	9.41147e-35	2.90329e-33	ENSG00000225300	AL591623.1
										ENSG00000245205	34.7474	1.14489	0.0931094	12.2961	9.50113e-35	2.92911e-33	ENSG00000245205	EEF1A1P4
										ENSG00000266245	1.28259	3.38572	0.275352	12.296	9.52049e-35	2.93324e-33	ENSG00000266245	MIR4644
										ENSG00000227544	11.6834	1.10987	0.0902667	12.2954	9.58578e-35	2.95151e-33	ENSG00000227544	AC018647.1
										ENSG00000253837	24.0875	1.26512	0.102909	12.2936	9.80595e-35	3.01741e-33	ENSG00000253837	AC090197.1
										ENSG00000088992	141.013	1.45098	0.118042	12.2921	9.98832e-35	3.06969e-33	ENSG00000088992	TESC
										ENSG00000279616	2.27434	2.63838	0.214663	12.2908	1.01464e-34	3.1144e-33	ENSG00000279616	AL096817.1
										ENSG00000084636	6768.66	1.11936	0.0910853	12.2892	1.03532e-34	3.17392e-33	ENSG00000084636	COL16A1
										ENSG00000254772	29.0698	1.29387	0.105314	12.2858	1.08027e-34	3.30965e-33	ENSG00000254772	EEF1G
										ENSG00000246851	7.78804	1.53903	0.125282	12.2846	1.09642e-34	3.35703e-33	ENSG00000246851	AL157938.3
										ENSG00000270672	5.98568	1.66432	0.135483	12.2843	1.09944e-34	3.36419e-33	ENSG00000270672	MTRNR2L6
										ENSG00000214650	11.3988	1.59089	0.129514	12.2835	1.11107e-34	3.39768e-33	ENSG00000214650	AC073592.1
										ENSG00000206702	6.75765	6.97801	0.56813	12.2824	1.12575e-34	3.44043e-33	ENSG00000206702	RNU1-11P
										ENSG00000261528	6.15074	2.12931	0.173384	12.2809	1.1471e-34	3.50348e-33	ENSG00000261528	AC002400.1
										ENSG00000228069	2.52132	2.20007	0.179165	12.2796	1.16574e-34	3.55823e-33	ENSG00000228069	MTCO3P29
										ENSG00000260064	2.18096	3.14709	0.256305	12.2787	1.1784e-34	3.59463e-33	ENSG00000260064	AC092332.1
										ENSG00000279548	1.63476	2.73009	0.222351	12.2783	1.18466e-34	3.60701e-33	ENSG00000279548	AL022323.5
										ENSG00000270269	3.81805	2.01288	0.163938	12.2783	1.18449e-34	3.60701e-33	ENSG00000270269	IMMP1LP1
										ENSG00000122872	1.92935	4.79512	0.3906	12.2763	1.21454e-34	3.69342e-33	ENSG00000122872	ARL4AP1
										ENSG00000234185	5.28637	1.62688	0.132532	12.2754	1.22752e-34	3.7306e-33	ENSG00000234185	AC068533.3
										ENSG00000237076	2.59026	2.21283	0.180275	12.2747	1.23833e-34	3.76113e-33	ENSG00000237076	AL035706.1
										ENSG00000279155	13.4882	1.54665	0.126041	12.271	1.29627e-34	3.93225e-33	ENSG00000279155	AC233300.1
										ENSG00000234274	1.48123	3.80331	0.309979	12.2695	1.31999e-34	3.99929e-33	ENSG00000234274	COX7BP2
										ENSG00000214067	1.57173	3.60119	0.293534	12.2684	1.33907e-34	4.0546e-33	ENSG00000214067	AL360182.1
										ENSG00000103024	3357.93	1.09512	0.0892658	12.2681	1.34418e-34	4.06757e-33	ENSG00000103024	NME3
										ENSG00000259175	3.44838	2.71658	0.221452	12.2671	1.3602e-34	4.11353e-33	ENSG00000259175	AC108451.1
										ENSG00000223899	3.90822	2.01737	0.164459	12.2668	1.36624e-34	4.12923e-33	ENSG00000223899	SEC13P1
										ENSG00000277157	28.7375	2.00082	0.163113	12.2664	1.37172e-34	4.14326e-33	ENSG00000277157	HIST1H4D
										ENSG00000253991	2.85165	2.68623	0.219054	12.2629	1.43307e-34	4.32328e-33	ENSG00000253991	AP001207.2
										ENSG00000250384	1.63122	3.92168	0.319811	12.2625	1.44001e-34	4.34154e-33	ENSG00000250384	UBE2CP3
										ENSG00000261596	19.3622	1.08771	0.0887099	12.2614	1.45954e-34	4.39774e-33	ENSG00000261596	AC005632.2
										ENSG00000078795	13.3117	1.29712	0.105807	12.2593	1.49757e-34	4.5068e-33	ENSG00000078795	PKD2L2
										ENSG00000236003	1.8146	3.63633	0.296621	12.2592	1.50011e-34	4.5117e-33	ENSG00000236003	AC007731.4
										ENSG00000237387	1.68683	4.0694	0.331966	12.2585	1.51341e-34	4.54891e-33	ENSG00000237387	AL022329.2
										ENSG00000252906	2.6981	4.82233	0.393431	12.2571	1.53879e-34	4.62237e-33	ENSG00000252906	SCARNA3
										ENSG00000255565	2.4311	4.11219	0.335574	12.2542	1.59524e-34	4.78904e-33	ENSG00000255565	AC073651.1
										ENSG00000278829	4.60505	2.18787	0.178565	12.2525	1.62906e-34	4.88758e-33	ENSG00000278829	AC099811.5
										ENSG00000254672	5.03584	2.75206	0.224625	12.2518	1.64338e-34	4.92455e-33	ENSG00000254672	AL136146.1
										ENSG00000227474	1.71903	3.03567	0.247781	12.2515	1.64989e-34	4.93804e-33	ENSG00000227474	RPL6P24
										ENSG00000255176	17.1713	1.44576	0.11813	12.2387	1.93032e-34	5.76064e-33	ENSG00000255176	AP000941.1
										ENSG00000232916	1.92177	2.66546	0.217789	12.2387	1.93059e-34	5.76064e-33	ENSG00000232916	HMGN2P27
										ENSG00000265907	2.74845	2.64454	0.216094	12.2379	1.94919e-34	5.81264e-33	ENSG00000265907	AP000919.2
										ENSG00000271320	10.1192	1.37191	0.112114	12.2367	1.97984e-34	5.90045e-33	ENSG00000271320	AC091488.1
										ENSG00000248216	2.55144	5.29085	0.432585	12.2308	2.12949e-34	6.33877e-33	ENSG00000248216	KCTD9P5
										ENSG00000180525	32.5839	1.74676	0.14282	12.2305	2.13626e-34	6.3551e-33	ENSG00000180525	PRR26
										ENSG00000228481	2.86302	3.84051	0.314093	12.2273	2.22207e-34	6.60636e-33	ENSG00000228481	U51244.1
										ENSG00000196811	5.54509	1.93779	0.158532	12.2233	2.33415e-34	6.9354e-33	ENSG00000196811	CHRNG
										ENSG00000153902	167.073	1.0894	0.0891882	12.2146	2.59839e-34	7.69729e-33	ENSG00000153902	LGI4
										ENSG00000251139	3.7593	2.62168	0.214691	12.2114	2.70068e-34	7.9955e-33	ENSG00000251139	AC084871.2
										ENSG00000279549	20.0291	1.41405	0.115804	12.2107	2.72418e-34	8.06023e-33	ENSG00000279549	AP000437.1
										ENSG00000235530	21.2084	1.36804	0.112071	12.2069	2.85739e-34	8.44421e-33	ENSG00000235530	AC087294.1
										ENSG00000233163	1.86137	2.75478	0.22572	12.2044	2.94462e-34	8.69678e-33	ENSG00000233163	RPS12P17
										ENSG00000232228	2.39438	1.9372	0.158756	12.2023	3.02044e-34	8.91537e-33	ENSG00000232228	AC092431.2
										ENSG00000254141	2.26292	3.66013	0.299984	12.2011	3.06715e-34	9.0424e-33	ENSG00000254141	AC103853.2
										ENSG00000212342	2.1156	3.57605	0.29316	12.1983	3.17482e-34	9.34862e-33	ENSG00000212342	RF00586
										ENSG00000239627	2.31098	4.56705	0.374505	12.1949	3.30857e-34	9.73666e-33	ENSG00000239627	RPL12P20
										ENSG00000212257	1.32637	4.07663	0.334305	12.1944	3.33102e-34	9.79685e-33	ENSG00000212257	RNU6-1176P
										ENSG00000240750	2.45461	2.74028	0.224744	12.1929	3.39144e-34	9.9686e-33	ENSG00000240750	RN7SL559P
										ENSG00000232083	1.69738	2.30636	0.189162	12.1925	3.40666e-34	1.00074e-32	ENSG00000232083	RPL31P7
										ENSG00000255968	24.0839	1.61484	0.132488	12.1885	3.57774e-34	1.05037e-32	ENSG00000255968	AC024145.1
										ENSG00000272256	5.46955	1.5326	0.125775	12.1853	3.72268e-34	1.09227e-32	ENSG00000272256	AC044849.1
										ENSG00000136206	20.9666	1.31775	0.10815	12.1844	3.76187e-34	1.10311e-32	ENSG00000136206	SPDYE1
										ENSG00000259294	1.9924	2.9961	0.245904	12.184	3.78127e-34	1.10814e-32	ENSG00000259294	AC005096.1
										ENSG00000200742	2.81194	2.43174	0.199601	12.183	3.83025e-34	1.12182e-32	ENSG00000200742	RF00019
										ENSG00000231335	8.76135	1.85876	0.152578	12.1823	3.86175e-34	1.13038e-32	ENSG00000231335
										ENSG00000230292	1.66722	4.10994	0.337371	12.1823	3.86451e-34	1.13051e-32	ENSG00000230292	NAALADL2-AS3
										ENSG00000279799	18.2468	1.1909	0.0977681	12.1808	3.93189e-34	1.1492e-32	ENSG00000279799	AC006077.2
										ENSG00000226438	1.81556	3.84298	0.315494	12.1808	3.93305e-34	1.1492e-32	ENSG00000226438	AL442071.1
										ENSG00000187642	165.097	1.16803	0.0959082	12.1786	4.03942e-34	1.17958e-32	ENSG00000187642	PERM1
										ENSG00000229894	2.52054	2.39056	0.19633	12.1762	4.16309e-34	1.21497e-32	ENSG00000229894	GK3P
										ENSG00000263219	6.29629	1.7513	0.143832	12.176	4.17053e-34	1.21642e-32	ENSG00000263219	RYKP1
										ENSG00000238168	3.51192	2.06923	0.169973	12.1739	4.28019e-34	1.24767e-32	ENSG00000238168	AC137055.1
										ENSG00000242829	1.82034	2.75726	0.226584	12.1688	4.55656e-34	1.32587e-32	ENSG00000242829	RPS26P21
										ENSG00000127528	1826.84	1.07067	0.0880086	12.1655	4.74303e-34	1.3785e-32	ENSG00000127528	KLF2
										ENSG00000261293	1.72435	4.1258	0.33915	12.1651	4.76784e-34	1.38408e-32	ENSG00000261293	AC007601.2
										ENSG00000224618	2.20674	4.84063	0.397971	12.1633	4.87769e-34	1.41513e-32	ENSG00000224618	AC096921.1
										ENSG00000242737	3.1347	1.92202	0.158073	12.1591	5.13303e-34	1.48834e-32	ENSG00000242737	AC012170.1
										ENSG00000259177	1.61842	3.62009	0.297788	12.1566	5.29016e-34	1.53209e-32	ENSG00000259177	AC018946.1
										ENSG00000231705	6.8279	1.76028	0.144809	12.1559	5.33737e-34	1.54486e-32	ENSG00000231705	AL451069.2
										ENSG00000207021	2.04845	2.72668	0.224397	12.1511	5.65771e-34	1.63565e-32	ENSG00000207021	RF00019
										ENSG00000240490	1.73988	3.0393	0.250142	12.1503	5.71412e-34	1.65099e-32	ENSG00000240490	RN7SL277P
										ENSG00000241120	7.15792	1.89224	0.155776	12.1471	5.94099e-34	1.71352e-32	ENSG00000241120	HMGN1P8
										ENSG00000259521	2.9295	1.89396	0.155939	12.1455	6.05877e-34	1.74545e-32	ENSG00000259521	INO80-AS1
										ENSG00000236709	2.1085	4.67218	0.384716	12.1445	6.13562e-34	1.76656e-32	ENSG00000236709	DAPK1-IT1
										ENSG00000262833	3.03501	2.38547	0.196428	12.1442	6.15645e-34	1.77152e-32	ENSG00000262833	AC016245.1
										ENSG00000227200	3.29229	2.12631	0.17514	12.1406	6.43284e-34	1.84889e-32	ENSG00000227200	AL162724.1
										ENSG00000230815	2.1489	4.13371	0.340521	12.1394	6.53264e-34	1.87648e-32	ENSG00000230815	AL807757.1
										ENSG00000241169	1.99312	4.05379	0.333947	12.139	6.5619e-34	1.88378e-32	ENSG00000241169	FO393419.2
										ENSG00000227945	4.19013	2.23582	0.184271	12.1333	7.03279e-34	2.01779e-32	ENSG00000227945	AL590006.1
										ENSG00000237331	2.58916	2.93742	0.242106	12.1328	7.08061e-34	2.03033e-32	ENSG00000237331	XIAP-AS1
										ENSG00000228261	7.37893	1.74532	0.143858	12.1322	7.1298e-34	2.04324e-32	ENSG00000228261	AL162742.1
										ENSG00000226520	1.86592	3.87749	0.319605	12.1321	7.1382e-34	2.04446e-32	ENSG00000226520	KIRREL1-IT1
										ENSG00000266498	2.87519	2.25388	0.185825	12.129	7.41129e-34	2.12021e-32	ENSG00000266498	AC055811.3
										ENSG00000099957	20.5834	1.69077	0.139407	12.1282	7.48357e-34	2.1384e-32	ENSG00000099957	P2RX6
										ENSG00000251257	7.27818	1.48029	0.122069	12.1267	7.62735e-34	2.17696e-32	ENSG00000251257	AC010457.1
										ENSG00000230399	1.5532	3.71093	0.306036	12.1258	7.71108e-34	2.19831e-32	ENSG00000230399	RBBP8P1
										ENSG00000248335	2.65536	3.64124	0.300431	12.1201	8.26955e-34	2.35479e-32	ENSG00000248335	AC096733.1
										ENSG00000228166	2.61538	3.39845	0.280467	12.1171	8.57e-34	2.43893e-32	ENSG00000228166	MTND1P11
										ENSG00000272330	2.22605	2.48865	0.205417	12.1151	8.78724e-34	2.49931e-32	ENSG00000272330	AC002044.1
										ENSG00000236936	4.12528	2.46996	0.203882	12.1146	8.83582e-34	2.51168e-32	ENSG00000236936	AL031005.1
										ENSG00000279400	17.9011	1.80974	0.149395	12.1138	8.92656e-34	2.53601e-32	ENSG00000279400	AC008957.3
										ENSG00000225726	5.9357	1.68178	0.138836	12.1134	8.9725e-34	2.54759e-32	ENSG00000225726	AC007000.2
										ENSG00000120329	3.30569	1.89441	0.156411	12.1117	9.15296e-34	2.59733e-32	ENSG00000120329	SLC25A2
										ENSG00000258620	2.07242	3.27392	0.270411	12.1072	9.67684e-34	2.74125e-32	ENSG00000258620	AL135838.1
										ENSG00000267672	3.15282	2.05217	0.169502	12.1071	9.69059e-34	2.74357e-32	ENSG00000267672	AC010632.2
										ENSG00000230154	3.16012	1.98918	0.164316	12.1058	9.83509e-34	2.78288e-32	ENSG00000230154	AC018463.1
										ENSG00000249713	2.45422	2.67765	0.221206	12.1048	9.96417e-34	2.81778e-32	ENSG00000249713	AC026725.1
										ENSG00000240751	9.45867	1.72798	0.142763	12.1039	1.00756e-33	2.84767e-32	ENSG00000240751	AC026348.1
										ENSG00000272983	49.1552	1.22568	0.101271	12.1031	1.01734e-33	2.87366e-32	ENSG00000272983	AL117339.4
										ENSG00000234031	5.45298	1.42622	0.117846	12.1024	1.0257e-33	2.8956e-32	ENSG00000234031	RPS3AP44
										ENSG00000256972	1.6344	3.50581	0.289737	12.1	1.05619e-33	2.97684e-32	ENSG00000256972	AP000462.3
										ENSG00000199990	1.42902	4.06232	0.335733	12.0999	1.05792e-33	2.97972e-32	ENSG00000199990	VTRNA1-1
										ENSG00000254129	1.82041	2.9017	0.239842	12.0984	1.07679e-33	3.03115e-32	ENSG00000254129	AC108449.1
										ENSG00000278863	2.02804	3.31018	0.273666	12.0957	1.1131e-33	3.13157e-32	ENSG00000278863	AC091059.2
										ENSG00000213542	15.802	1.07937	0.0892504	12.0938	1.13923e-33	3.20324e-32	ENSG00000213542	AC007000.1
										ENSG00000269194	24.7942	1.30774	0.10815	12.0919	1.16504e-33	3.27395e-32	ENSG00000269194	AC006942.1
										ENSG00000231509	2.17774	2.99677	0.247844	12.0914	1.17316e-33	3.29489e-32	ENSG00000231509	AL162253.1
										ENSG00000230370	1.75617	2.65059	0.219237	12.0901	1.19211e-33	3.34621e-32	ENSG00000230370	RPL23AP52
										ENSG00000280344	2.2949	2.79975	0.231576	12.09	1.1935e-33	3.3482e-32	ENSG00000280344	AC009166.2
										ENSG00000280152	26.5953	1.2053	0.099697	12.0896	1.19798e-33	3.35693e-32	ENSG00000280152	AC009078.3
										ENSG00000248965	2.3294	3.26599	0.27017	12.0887	1.21232e-33	3.39327e-32	ENSG00000248965	AC011389.2
										ENSG00000197766	1909.7	1.7966	0.148618	12.0887	1.21167e-33	3.39327e-32	ENSG00000197766	CFD
										ENSG00000256481	2.3228	2.72876	0.225789	12.0854	1.26102e-33	3.52756e-32	ENSG00000256481	AP006333.2
										ENSG00000235677	12.3301	1.53923	0.127363	12.0853	1.2626e-33	3.52998e-32	ENSG00000235677	NPM1P26
										ENSG00000279294	2.02273	3.14052	0.259866	12.0852	1.26502e-33	3.53475e-32	ENSG00000279294	AC092135.1
										ENSG00000257979	2.15738	4.39595	0.363786	12.0839	1.28485e-33	3.5881e-32	ENSG00000257979	SNRPGP18
										ENSG00000230872	21.7661	1.33323	0.110348	12.0821	1.31337e-33	3.66566e-32	ENSG00000230872	MFSD13B
										ENSG00000212360	1.59182	4.12909	0.34179	12.0808	1.33449e-33	3.72251e-32	ENSG00000212360	RNU6-1177P
										ENSG00000227053	9.17302	1.4917	0.123481	12.0803	1.34157e-33	3.74014e-32	ENSG00000227053	AC105446.1
										ENSG00000279786	12.8546	1.77176	0.146668	12.08	1.34666e-33	3.75219e-32	ENSG00000279786	AC105235.1
										ENSG00000273090	1.47142	2.67876	0.22177	12.079	1.36386e-33	3.79797e-32	ENSG00000273090	AC007378.1
										ENSG00000269936	447.148	1.44472	0.119614	12.0782	1.37754e-33	3.8339e-32	ENSG00000269936
										ENSG00000253153	2.18765	3.28113	0.271677	12.0773	1.39188e-33	3.87164e-32	ENSG00000253153	AP001207.1
										ENSG00000233602	8.13492	1.80402	0.149385	12.0763	1.40847e-33	3.91334e-32	ENSG00000233602	ERI3-IT1
										ENSG00000271789	18.1465	1.34792	0.111622	12.0757	1.41885e-33	3.93997e-32	ENSG00000271789	AL080317.2
										ENSG00000237139	2.44754	2.4048	0.199166	12.0744	1.44286e-33	4.00439e-32	ENSG00000237139	RPS26P41
										ENSG00000188305	28.7372	1.04905	0.0868942	12.0728	1.4709e-33	4.0776e-32	ENSG00000188305	PEAK3
										ENSG00000254653	1.78519	3.0721	0.254466	12.0727	1.47201e-33	4.07838e-32	ENSG00000254653	AC024475.1
										ENSG00000279513	5.40116	1.63985	0.135841	12.0719	1.48751e-33	4.1167e-32	ENSG00000279513	AL157902.2
										ENSG00000226149	4.46319	1.77866	0.14737	12.0694	1.5332e-33	4.24077e-32	ENSG00000226149	AL356124.1
										ENSG00000224121	3.10928	2.40215	0.199044	12.0684	1.55033e-33	4.28573e-32	ENSG00000224121	ATG12P2
										ENSG00000231905	2.28378	4.14434	0.343475	12.0659	1.59886e-33	4.41742e-32	ENSG00000231905	SETP10
										ENSG00000260103	20.294	1.13997	0.0945002	12.0631	1.65337e-33	4.5629e-32	ENSG00000260103	AC012435.1
										ENSG00000258526	4.96848	1.64972	0.136808	12.0587	1.74593e-33	4.81294e-32	ENSG00000258526	AL049875.1
										ENSG00000202392	1.72006	2.92891	0.242926	12.0568	1.78569e-33	4.91979e-32	ENSG00000202392	RN7SKP292
										ENSG00000132639	216.302	2.119	0.175786	12.0544	1.8385e-33	5.05679e-32	ENSG00000132639	SNAP25
										ENSG00000189409	7.30282	1.72763	0.143346	12.0521	1.89002e-33	5.19561e-32	ENSG00000189409	MMP23B
										ENSG00000255471	59.4023	1.18006	0.0979368	12.0492	1.95846e-33	5.37474e-32	ENSG00000255471	AP001528.2
										ENSG00000199627	1.71732	2.81724	0.233814	12.0491	1.96198e-33	5.38139e-32	ENSG00000199627	RNU6-1010P
										ENSG00000236007	1.81329	3.2805	0.272264	12.049	1.96356e-33	5.38274e-32	ENSG00000236007	MTCO1P46
										ENSG00000133958	60.9762	1.41952	0.117825	12.0477	1.99394e-33	5.46299e-32	ENSG00000133958	UNC79
										ENSG00000270577	1.72983	3.18765	0.264722	12.0415	2.15034e-33	5.88165e-32	ENSG00000270577	AC006023.1
										ENSG00000276810	2.0012	3.00675	0.249738	12.0396	2.20006e-33	6.01432e-32	ENSG00000276810	AC244093.2
										ENSG00000268438	10.4024	1.69207	0.140602	12.0345	2.341e-33	6.39606e-32	ENSG00000268438	BNIP3P27
										ENSG00000236576	2.17013	4.12308	0.342636	12.0334	2.37147e-33	6.47571e-32	ENSG00000236576	AC241520.1
										ENSG00000278376	90.1771	1.01462	0.0843202	12.033	2.38428e-33	6.50707e-32	ENSG00000278376	AP004609.3
										ENSG00000273584	2.10336	2.44765	0.203441	12.0313	2.4337e-33	6.63828e-32	ENSG00000273584	AC096708.3
										ENSG00000222057	4.10222	2.01951	0.167858	12.0311	2.4403e-33	6.65257e-32	ENSG00000222057	RNU4-62P
										ENSG00000268751	78.0956	1.8068	0.150182	12.0307	2.45072e-33	6.67729e-32	ENSG00000268751	SCGB1B2P
										ENSG00000232031	1.5359	4.32181	0.359234	12.0306	2.45249e-33	6.67842e-32	ENSG00000232031	AL078599.2
										ENSG00000232034	4.48743	2.44985	0.203665	12.0288	2.50848e-33	6.82711e-32	ENSG00000232034	AC092168.2
										ENSG00000228729	2.50939	3.56177	0.296144	12.0271	2.55872e-33	6.95999e-32	ENSG00000228729	AL627308.1
										ENSG00000275894	22.3975	1.43469	0.119307	12.0252	2.62106e-33	7.1217e-32	ENSG00000275894	AL021578.1
										ENSG00000106333	5759.92	1.04549	0.0869554	12.0233	2.67942e-33	7.27626e-32	ENSG00000106333	PCOLCE
										ENSG00000254732	20.2543	1.49967	0.124732	12.0231	2.68696e-33	7.29271e-32	ENSG00000254732	AP001931.1
										ENSG00000271384	11.1978	1.31135	0.109098	12.0199	2.79231e-33	7.57446e-32	ENSG00000271384	AL161729.3
										ENSG00000278842	3.75195	1.92141	0.159869	12.0186	2.83654e-33	7.69022e-32	ENSG00000278842	AC008147.4
										ENSG00000168263	5.50841	1.79458	0.149391	12.0127	3.04904e-33	8.26177e-32	ENSG00000168263	KCNV2
										ENSG00000279121	2.02235	2.95936	0.246557	12.0028	3.43679e-33	9.28178e-32	ENSG00000279121	AC073592.5
										ENSG00000223584	2.51072	3.98123	0.33182	11.9982	3.63264e-33	9.80534e-32	ENSG00000223584	TVP23CP1
										ENSG00000244286	5.01833	2.29228	0.191096	11.9955	3.75365e-33	1.01153e-31	ENSG00000244286	ITGB5-AS1
										ENSG00000232907	23.4969	1.16597	0.0972108	11.9942	3.81125e-33	1.02649e-31	ENSG00000232907	DLGAP4-AS1
										ENSG00000251034	73.6777	1.01138	0.084341	11.9916	3.93341e-33	1.05882e-31	ENSG00000251034	AC037459.2
										ENSG00000279885	3.60306	3.79471	0.31655	11.9877	4.12073e-33	1.10863e-31	ENSG00000279885	AP005060.1
										ENSG00000230201	1.82239	3.08974	0.257758	11.987	4.15719e-33	1.11783e-31	ENSG00000230201	ATP6V0CP1
										ENSG00000207493	2.72346	3.10547	0.259094	11.9859	4.21282e-33	1.13155e-31	ENSG00000207493	SNORA46
										ENSG00000259840	15.1501	1.46772	0.122456	11.9857	4.22139e-33	1.13324e-31	ENSG00000259840	Z97653.1
										ENSG00000242595	2.31378	3.56563	0.29751	11.9849	4.26309e-33	1.14381e-31	ENSG00000242595	RPL26P26
										ENSG00000272491	15.3455	1.36437	0.113843	11.9847	4.27563e-33	1.14655e-31	ENSG00000272491	AL109659.2
										ENSG00000271428	3.87112	2.1408	0.178635	11.9842	4.30038e-33	1.15256e-31	ENSG00000271428	AL031281.1
										ENSG00000267298	2.65541	2.1803	0.181943	11.9834	4.34128e-33	1.16289e-31	ENSG00000267298	AC006116.5
										ENSG00000210082	466304	1.10293	0.0920496	11.9819	4.41856e-33	1.18295e-31	ENSG00000210082	MT-RNR2
										ENSG00000267206	11.7498	2.01771	0.168417	11.9804	4.50061e-33	1.20425e-31	ENSG00000267206	LCN6
										ENSG00000236375	1.97771	3.7449	0.312588	11.9803	4.50658e-33	1.2052e-31	ENSG00000236375	POU5F1P5
										ENSG00000259505	1.67701	3.50422	0.29251	11.9798	4.53204e-33	1.21135e-31	ENSG00000259505	AC009268.1
										ENSG00000119632	798.817	1.01894	0.0850641	11.9785	4.60814e-33	1.23102e-31	ENSG00000119632	IFI27L2
										ENSG00000230084	17.9671	1.14732	0.0957888	11.9776	4.65664e-33	1.2433e-31	ENSG00000230084	AC006059.1
										ENSG00000149451	287.201	1.50435	0.125623	11.9751	4.79965e-33	1.28079e-31	ENSG00000149451	ADAM33
										ENSG00000239946	2.46018	5.27398	0.440417	11.975	4.80632e-33	1.28188e-31	ENSG00000239946	ZBTB20-AS3
										ENSG00000200792	2.14649	4.73201	0.395167	11.9747	4.82029e-33	1.28491e-31	ENSG00000200792	SNORA80A
										ENSG00000267430	2.59575	2.40926	0.201272	11.9701	5.09428e-33	1.35647e-31	ENSG00000267430	AC036176.2
										ENSG00000259163	6.11702	2.01041	0.168011	11.966	5.3566e-33	1.42555e-31	ENSG00000259163	AL096869.2
										ENSG00000072315	2.21769	3.12735	0.261358	11.9657	5.37133e-33	1.4287e-31	ENSG00000072315	TRPC5
										ENSG00000230225	2.70528	2.75682	0.230408	11.9649	5.4236e-33	1.44182e-31	ENSG00000230225	MTND5P14
										ENSG00000272469	1.51983	4.28398	0.358158	11.9611	5.67765e-33	1.50773e-31	ENSG00000272469	RN7SL760P
										ENSG00000199977	2.05718	2.88001	0.240823	11.9591	5.82203e-33	1.54524e-31	ENSG00000199977	RF00045
										ENSG00000130748	277.596	1.01404	0.0848065	11.9571	5.96412e-33	1.5821e-31	ENSG00000130748	TMEM160
										ENSG00000239671	1.44524	3.17335	0.265418	11.9561	6.03564e-33	1.60021e-31	ENSG00000239671	AC100793.1
										ENSG00000253770	1.80591	4.36942	0.365477	11.9554	6.08486e-33	1.61235e-31	ENSG00000253770	HMGB1P23
										ENSG00000260723	1.65446	4.09583	0.342623	11.9543	6.16264e-33	1.63124e-31	ENSG00000260723	AC007598.1
										ENSG00000230629	58.0646	1.08543	0.0908031	11.9536	6.21583e-33	1.64444e-31	ENSG00000230629	RPS23P8
										ENSG00000259103	2.36349	3.87753	0.324534	11.948	6.65171e-33	1.75881e-31	ENSG00000259103	AF107885.2
										ENSG00000279198	67.9817	1.20551	0.10093	11.9441	6.97249e-33	1.84264e-31	ENSG00000279198	AC008894.3
										ENSG00000231409	9.85848	1.14789	0.0961125	11.9432	7.04763e-33	1.8615e-31	ENSG00000231409	AC018868.1
										ENSG00000231756	1.63621	4.08425	0.34199	11.9426	7.09722e-33	1.87359e-31	ENSG00000231756	AL449983.1
										ENSG00000231849	1.55505	3.86783	0.323928	11.9404	7.28637e-33	1.92146e-31	ENSG00000231849	UBE2V2P4
										ENSG00000272072	34.47	1.11407	0.093307	11.9398	7.3408e-33	1.93478e-31	ENSG00000272072	AC004492.1
										ENSG00000260137	1.63209	3.02526	0.253382	11.9395	7.36439e-33	1.93996e-31	ENSG00000260137	AL132657.2
										ENSG00000234619	3.69584	2.01158	0.168517	11.9369	7.59935e-33	1.99971e-31	ENSG00000234619	RPL7P11
										ENSG00000276337	19.1129	1.45856	0.12219	11.9367	7.61441e-33	2.00261e-31	ENSG00000276337	AC105429.1
										ENSG00000221083	2.7133	2.41237	0.20213	11.9348	7.79809e-33	2.04873e-31	ENSG00000221083	RF00599
										ENSG00000251234	1.38338	3.94944	0.330932	11.9343	7.84324e-33	2.05949e-31	ENSG00000251234	PSMA2P2
										ENSG00000228401	9.94343	1.25148	0.104875	11.933	7.96198e-33	2.08955e-31	ENSG00000228401	AL590226.1
										ENSG00000279050	3.95544	1.94752	0.163342	11.923	8.98164e-33	2.35339e-31	ENSG00000279050	PWAR1
										ENSG00000240418	5.98535	1.3363	0.112082	11.9225	9.03423e-33	2.36591e-31	ENSG00000240418	AC020917.1
										ENSG00000253457	2.9929	2.19047	0.183734	11.922	9.0935e-33	2.38017e-31	ENSG00000253457	SMIM18
										ENSG00000225364	1.99191	4.16766	0.349611	11.9209	9.21487e-33	2.41065e-31	ENSG00000225364	ATP6V0E1P1
										ENSG00000205090	38.4844	1.12598	0.0944605	11.9201	9.30165e-33	2.43206e-31	ENSG00000205090	TMEM240
										ENSG00000228548	1.98298	3.35165	0.28119	11.9195	9.36398e-33	2.44706e-31	ENSG00000228548	ITPKB-AS1
										ENSG00000232018	1.9921	3.23579	0.271501	11.9181	9.52011e-33	2.48654e-31	ENSG00000232018
										ENSG00000256557	2.54175	4.75159	0.39869	11.918	9.53749e-33	2.48976e-31	ENSG00000256557	AC009509.3
										ENSG00000259544	2.61761	2.21199	0.185631	11.9161	9.76119e-33	2.54546e-31	ENSG00000259544	AC021739.4
										ENSG00000249252	11.7738	1.72168	0.144501	11.9147	9.92057e-33	2.58565e-31	ENSG00000249252	AC098829.1
										ENSG00000224797	1.99526	2.5813	0.216652	11.9145	9.95056e-33	2.59209e-31	ENSG00000224797	AL359092.1
										ENSG00000227321	2.52516	2.39375	0.200974	11.9108	1.03988e-32	2.70743e-31	ENSG00000227321	MTND4P15
										ENSG00000235910	6.08921	1.58624	0.133232	11.9059	1.10297e-32	2.86864e-31	ENSG00000235910	APOA1-AS
										ENSG00000213261	41.1689	1.02262	0.0858929	11.9058	1.10441e-32	2.87088e-31	ENSG00000213261	EEF1B2P6
										ENSG00000224057	5.30834	2.99688	0.251754	11.904	1.12773e-32	2.92996e-31	ENSG00000224057	EGFR-AS1
										ENSG00000200502	9.52432	1.52175	0.127883	11.8996	1.1892e-32	3.0864e-31	ENSG00000200502	RF00019
										ENSG00000273557	4.91349	1.79898	0.151217	11.8967	1.23119e-32	3.1937e-31	ENSG00000273557	AC008781.3
										ENSG00000238273	47.479	1.68988	0.142106	11.8917	1.30712e-32	3.38709e-31	ENSG00000238273	AC108058.1
										ENSG00000225450	7.67328	1.25395	0.105451	11.8913	1.31381e-32	3.40264e-31	ENSG00000225450	AL021707.1
										ENSG00000259232	1.78391	2.54663	0.214201	11.889	1.35018e-32	3.495e-31	ENSG00000259232	AC105129.1
										ENSG00000271717	10.2722	1.63699	0.137692	11.8888	1.35404e-32	3.50315e-31	ENSG00000271717	AC022146.2
										ENSG00000235088	2.75389	2.44324	0.205518	11.8882	1.3629e-32	3.52422e-31	ENSG00000235088	AL031667.2
										ENSG00000246366	15.7047	1.23628	0.104007	11.8865	1.39147e-32	3.5962e-31	ENSG00000246366	LACTB2-AS1
										ENSG00000270387	2.03769	4.66571	0.39255	11.8856	1.40548e-32	3.6305e-31	ENSG00000270387	AC115621.1
										ENSG00000225891	12.3537	1.23829	0.104185	11.8855	1.40777e-32	3.63451e-31	ENSG00000225891	AL513365.2
										ENSG00000267667	2.58868	2.18211	0.183616	11.8841	1.43162e-32	3.69415e-31	ENSG00000267667	AC005856.1
										ENSG00000274210	11.0492	1.81407	0.152649	11.8839	1.43483e-32	3.7005e-31	ENSG00000274210	RF00003
										ENSG00000267196	1.54874	3.10419	0.261222	11.8834	1.44422e-32	3.72276e-31	ENSG00000267196	AC091044.1
										ENSG00000270040	3.09095	2.26544	0.190647	11.8829	1.45293e-32	3.74326e-31	ENSG00000270040	AL356055.1
										ENSG00000259402	2.42288	2.22566	0.187313	11.882	1.46819e-32	3.78059e-31	ENSG00000259402	AC090515.5
										ENSG00000232259	6.15056	1.73153	0.145734	11.8814	1.47841e-32	3.8049e-31	ENSG00000232259	AL158166.2
										ENSG00000224959	4.00154	1.87131	0.15752	11.8798	1.50747e-32	3.87768e-31	ENSG00000224959	AC017002.1
										ENSG00000253116	5.85162	2.35169	0.197961	11.8796	1.51091e-32	3.88451e-31	ENSG00000253116	AC027698.1
										ENSG00000262003	18.2725	1.30699	0.110052	11.8761	1.57548e-32	4.04627e-31	ENSG00000262003	AC087392.1
										ENSG00000258531	1.77475	2.66754	0.22463	11.8753	1.59135e-32	4.0849e-31	ENSG00000258531	BANF1P1
										ENSG00000229569	1.74829	2.99464	0.252279	11.8703	1.68764e-32	4.32531e-31	ENSG00000229569	AL356753.1
										ENSG00000250614	1.93859	2.774	0.233721	11.8689	1.71753e-32	4.39278e-31	ENSG00000250614	AC005522.1
										ENSG00000261646	5.03147	2.1101	0.177832	11.8657	1.78418e-32	4.56086e-31	ENSG00000261646	AC093849.1
										ENSG00000280269	6.63428	1.85656	0.156472	11.8652	1.79574e-32	4.58565e-31	ENSG00000280269	AP000577.1
										ENSG00000230397	1.61276	2.58779	0.21815	11.8624	1.85505e-32	4.7322e-31	ENSG00000230397	SPTLC1P1
										ENSG00000239280	3.56569	2.44729	0.206355	11.8596	1.91814e-32	4.88808e-31	ENSG00000239280	AC108693.1
										ENSG00000253550	1.50338	2.99398	0.252533	11.8558	2.00757e-32	5.11334e-31	ENSG00000253550	AC016065.2
										ENSG00000213608	2.74947	2.18446	0.184278	11.8541	2.04834e-32	5.2091e-31	ENSG00000213608	SLC25A14P1
										ENSG00000279334	1.67723	3.59932	0.303864	11.8452	2.28004e-32	5.78935e-31	ENSG00000279334	AC073592.6
										ENSG00000241723	1.65865	2.75643	0.232727	11.8441	2.30984e-32	5.86199e-31	ENSG00000241723	AC074276.1
										ENSG00000202566	5.53304	1.97119	0.166468	11.8413	2.38846e-32	6.04905e-31	ENSG00000202566	MIR421
										ENSG00000241409	1.37312	3.7648	0.317942	11.8411	2.39183e-32	6.05447e-31	ENSG00000241409	AC064852.1
										ENSG00000214062	3.98257	1.77606	0.150004	11.8401	2.42201e-32	6.12771e-31	ENSG00000214062	RPL7P17
										ENSG00000274383	41.2121	1.00693	0.0850869	11.8341	2.60087e-32	6.57685e-31	ENSG00000274383	AC103691.1
										ENSG00000224895	2.16297	4.41981	0.373546	11.832	2.66578e-32	6.73752e-31	ENSG00000224895	VPS26BP1
										ENSG00000242134	2.40283	3.24118	0.274009	11.8287	2.77261e-32	7.00033e-31	ENSG00000242134	RPL5P13
										ENSG00000280432	3.48234	3.8187	0.322843	11.8283	2.7857e-32	7.02979e-31	ENSG00000280432	AP000962.2
										ENSG00000241187	1.92931	2.65595	0.224575	11.8265	2.84627e-32	7.17896e-31	ENSG00000241187	AC008379.1
										ENSG00000188152	14.2419	1.12151	0.0948376	11.8256	2.87989e-32	7.26004e-31	ENSG00000188152	NUTM2G
										ENSG00000036530	67.0424	1.03569	0.0875823	11.8253	2.88851e-32	7.27803e-31	ENSG00000036530	CYP46A1
										ENSG00000244021	7.44491	1.42447	0.120472	11.8241	2.93029e-32	7.37953e-31	ENSG00000244021	AC093591.1
										ENSG00000161055	490.162	2.68237	0.226868	11.8235	2.95212e-32	7.4307e-31	ENSG00000161055	SCGB3A1
										ENSG00000279785	2.39188	2.23063	0.188668	11.823	2.96834e-32	7.46772e-31	ENSG00000279785	AC008267.8
										ENSG00000198553	22.1713	1.21718	0.102958	11.8221	3.00212e-32	7.54885e-31	ENSG00000198553	KCNRG
										ENSG00000263501	2.48291	4.09028	0.346025	11.8208	3.04801e-32	7.66033e-31	ENSG00000263501	AC005828.2
										ENSG00000228988	1.49912	3.46369	0.293184	11.8141	3.3024e-32	8.28274e-31	ENSG00000228988	AL353771.1
										ENSG00000230593	4.30379	1.6215	0.137254	11.8139	3.30809e-32	8.2928e-31	ENSG00000230593	PPIAP40
										ENSG00000274929	7.23126	1.10132	0.093226	11.8135	3.32569e-32	8.33268e-31	ENSG00000274929	AL157813.1
										ENSG00000270575	2.20257	4.91012	0.4157	11.8117	3.39693e-32	8.50684e-31	ENSG00000270575	AL160281.1
										ENSG00000257531	3.44768	1.96441	0.166312	11.8115	3.40269e-32	8.51693e-31	ENSG00000257531	AC008147.3
										ENSG00000259545	1.33097	3.03548	0.257084	11.8074	3.57596e-32	8.94609e-31	ENSG00000259545	AC013452.1
										ENSG00000225195	2.48069	2.79488	0.236718	11.8067	3.60224e-32	9.00726e-31	ENSG00000225195	AC078962.1
										ENSG00000256019	2.65312	3.37309	0.285799	11.8023	3.79609e-32	9.48714e-31	ENSG00000256019	TAS2R63P
										ENSG00000234750	10.3457	1.43121	0.12127	11.8018	3.82075e-32	9.54394e-31	ENSG00000234750	AC012618.2
										ENSG00000199436	3.18116	1.97386	0.167253	11.8016	3.82743e-32	9.55576e-31	ENSG00000199436	SNORD9
										ENSG00000273474	10.3345	1.28725	0.109112	11.7976	4.0172e-32	1.00194e-30	ENSG00000273474	AL157392.4
										ENSG00000275014	1.7945	4.46814	0.378732	11.7976	4.01527e-32	1.00194e-30	ENSG00000275014	RN7SL166P
										ENSG00000259581	4.1607	2.04673	0.1735	11.7968	4.05665e-32	1.01127e-30	ENSG00000259581	TYRO3P
										ENSG00000218521	3.36793	5.63082	0.477385	11.7951	4.13528e-32	1.03035e-30	ENSG00000218521	AL589655.1
										ENSG00000237249	1.65609	3.50863	0.297465	11.7951	4.13759e-32	1.0304e-30	ENSG00000237249	Z99127.3
										ENSG00000275178	4.38321	1.72035	0.145853	11.795	4.13995e-32	1.03047e-30	ENSG00000275178	AC018529.1
										ENSG00000265713	3.56629	2.78001	0.235758	11.7918	4.30165e-32	1.06963e-30	ENSG00000265713	AC023389.2
										ENSG00000241890	1.97118	2.52389	0.214052	11.791	4.34128e-32	1.07894e-30	ENSG00000241890	RPL13P4
										ENSG00000259513	1.80567	2.79921	0.237449	11.7887	4.46309e-32	1.10866e-30	ENSG00000259513	CYCSP38
										ENSG00000230661	1.77745	4.45229	0.377908	11.7814	4.86789e-32	1.20799e-30	ENSG00000230661	YY1P1
										ENSG00000253519	2.69467	2.45471	0.208366	11.7808	4.90511e-32	1.21662e-30	ENSG00000253519	AC106801.1
										ENSG00000263657	4.55052	1.97866	0.167962	11.7804	4.92734e-32	1.2209e-30	ENSG00000263657	AC023389.1
										ENSG00000265625	6.13906	1.69012	0.143469	11.7804	4.92516e-32	1.2209e-30	ENSG00000265625	AC104564.5
										ENSG00000263603	7.13006	1.61969	0.137528	11.7771	5.11982e-32	1.26795e-30	ENSG00000263603	AC127024.2
										ENSG00000277035	1.75981	3.95866	0.336296	11.7713	5.48438e-32	1.35687e-30	ENSG00000277035	RF02271
										ENSG00000188649	6.92893	1.32282	0.11238	11.771	5.5041e-32	1.36107e-30	ENSG00000188649	CC2D2B
										ENSG00000177688	9.53143	1.4582	0.123896	11.7695	5.60307e-32	1.38485e-30	ENSG00000177688	SUMO4
										ENSG00000233858	6.17147	1.586	0.134758	11.7692	5.62239e-32	1.38753e-30	ENSG00000233858	AC026904.1
										ENSG00000230542	2.35901	2.49123	0.211692	11.7682	5.69322e-32	1.40431e-30	ENSG00000230542	LINC00102
										ENSG00000238259	1.59749	3.55892	0.302444	11.7672	5.75919e-32	1.41987e-30	ENSG00000238259	AC067940.1
										ENSG00000280092	2.50175	2.99642	0.254657	11.7665	5.8072e-32	1.43027e-30	ENSG00000280092	AC002044.3
										ENSG00000219712	2.95176	3.38502	0.287701	11.7657	5.86039e-32	1.44265e-30	ENSG00000219712	AL357054.1
										ENSG00000228906	29.6554	1.22298	0.103956	11.7643	5.95993e-32	1.46569e-30	ENSG00000228906	AL353804.1
										ENSG00000259096	2.9388	2.01891	0.171633	11.7629	6.05834e-32	1.48915e-30	ENSG00000259096	FAM35CP
										ENSG00000237877	27.0163	1.01242	0.0860778	11.7617	6.14667e-32	1.5101e-30	ENSG00000237877	LINC01473
										ENSG00000248930	1.39656	3.90942	0.332466	11.7589	6.35863e-32	1.5614e-30	ENSG00000248930	AC020893.1
										ENSG00000234369	5.99061	1.72712	0.146893	11.7577	6.44884e-32	1.58197e-30	ENSG00000234369	TATDN1P1
										ENSG00000228657	2.50059	2.14997	0.182881	11.7561	6.56989e-32	1.61087e-30	ENSG00000228657	RPL23AP58
										ENSG00000229822	1.49491	3.82571	0.325557	11.7513	6.95712e-32	1.70411e-30	ENSG00000229822	AL353691.1
										ENSG00000250170	2.18513	4.15323	0.353437	11.751	6.9796e-32	1.70792e-30	ENSG00000250170	RASA2-IT1
										ENSG00000265996	6.68855	1.46981	0.125089	11.7502	7.04596e-32	1.7233e-30	ENSG00000265996	MIR3671
										ENSG00000215244	41.274	1.35506	0.115336	11.7488	7.15895e-32	1.75007e-30	ENSG00000215244	AL137145.2
										ENSG00000267702	72.8242	1.50683	0.128258	11.7484	7.19658e-32	1.7584e-30	ENSG00000267702	AP005131.6
										ENSG00000215399	3.99414	1.90202	0.161897	11.7483	7.20435e-32	1.75913e-30	ENSG00000215399	HMGB3P7
										ENSG00000273084	83.5392	1.00765	0.085787	11.746	7.40457e-32	1.80653e-30	ENSG00000273084	AC092171.5
										ENSG00000264653	1.57878	3.84545	0.327395	11.7456	7.44078e-32	1.81356e-30	ENSG00000264653	MIR5194
										ENSG00000248019	87.9652	1.02789	0.0875235	11.7441	7.56806e-32	1.84367e-30	ENSG00000248019	FAM13A-AS1
										ENSG00000279991	2.29493	4.11092	0.350147	11.7406	7.89617e-32	1.92265e-30	ENSG00000279991	AC009044.1
										ENSG00000167751	22.8255	2.25953	0.192487	11.7386	8.08003e-32	1.96645e-30	ENSG00000167751	KLK2
										ENSG00000232282	1.91682	4.7595	0.405496	11.7375	8.18938e-32	1.99208e-30	ENSG00000232282	MTND1P32
										ENSG00000258926	10.6262	1.68584	0.143637	11.7368	8.25658e-32	2.00743e-30	ENSG00000258926	AL355916.2
										ENSG00000234159	1.71	3.88082	0.330693	11.7354	8.39074e-32	2.03803e-30	ENSG00000234159	RBPMSLP
										ENSG00000232792	1.4223	3.28538	0.28001	11.733	8.62962e-32	2.09399e-30	ENSG00000232792	FTH1P25
										ENSG00000259113	4.78057	1.71508	0.146193	11.7316	8.7755e-32	2.12834e-30	ENSG00000259113	AL118556.1
										ENSG00000235244	11.1443	1.73333	0.147762	11.7306	8.88706e-32	2.15433e-30	ENSG00000235244	DANT2
										ENSG00000277563	4.05349	2.00732	0.171121	11.7304	8.89948e-32	2.15527e-30	ENSG00000277563	AC063961.1
										ENSG00000171217	16.6288	1.45923	0.124397	11.7304	8.89966e-32	2.15527e-30	ENSG00000171217	CLDN20
										ENSG00000248288	1.40316	2.52095	0.214923	11.7295	8.99429e-32	2.17711e-30	ENSG00000248288	AC008868.1
										ENSG00000257097	4.47677	1.93839	0.165357	11.7225	9.77745e-32	2.3632e-30	ENSG00000257097	CLIP1-AS1
										ENSG00000126218	116.921	1.08462	0.0925411	11.7205	1.00136e-31	2.41908e-30	ENSG00000126218	F10
										ENSG00000250930	2.28389	2.96014	0.252577	11.7198	1.00928e-31	2.43702e-30	ENSG00000250930	LNX1-AS1
										ENSG00000269653	8.49238	1.5111	0.12895	11.7185	1.02493e-31	2.47359e-30	ENSG00000269653	AC011479.3
										ENSG00000214787	20.2551	1.3305	0.113553	11.717	1.04277e-31	2.51542e-30	ENSG00000214787	MS4A4E
										ENSG00000248696	1.62958	3.71658	0.317242	11.7153	1.06456e-31	2.56422e-30	ENSG00000248696	AC011406.1
										ENSG00000203709	841.244	1.64897	0.140754	11.7152	1.06519e-31	2.56448e-30	ENSG00000203709	MIR29B2CHG
										ENSG00000163395	42.5607	2.10485	0.179674	11.7149	1.06974e-31	2.57418e-30	ENSG00000163395	IGFN1
										ENSG00000231105	21.6245	1.18382	0.101056	11.7144	1.07491e-31	2.58535e-30	ENSG00000231105	AL031728.1
										ENSG00000237243	2.92343	3.42303	0.292232	11.7134	1.08788e-31	2.61527e-30	ENSG00000237243	AC022173.1
										ENSG00000180846	4.07388	1.71859	0.146725	11.7131	1.09267e-31	2.62551e-30	ENSG00000180846	CSNK1G2-AS1
										ENSG00000089847	128.861	1.21993	0.104155	11.7127	1.09764e-31	2.63615e-30	ENSG00000089847	ANKRD24
										ENSG00000227331	5.08597	1.88637	0.16114	11.7064	1.18187e-31	2.83707e-30	ENSG00000227331	AC005042.1
										ENSG00000270282	2.64023	2.30489	0.196903	11.7057	1.19122e-31	2.85812e-30	ENSG00000270282	AL096855.2
										ENSG00000266378	5.41226	1.96687	0.16803	11.7055	1.19484e-31	2.86542e-30	ENSG00000266378	AC005224.3
										ENSG00000240853	1.74271	3.5405	0.30269	11.6968	1.32374e-31	3.16988e-30	ENSG00000240853	RN7SL328P
										ENSG00000254856	1.82871	3.92017	0.335151	11.6967	1.32468e-31	3.17061e-30	ENSG00000254856	NDUFA3P2
										ENSG00000279030	3.48274	1.99053	0.170212	11.6944	1.36158e-31	3.25417e-30	ENSG00000279030	AC007336.3
										ENSG00000204706	31.4762	1.18031	0.10093	11.6943	1.36369e-31	3.25764e-30	ENSG00000204706	MAMDC2-AS1
										ENSG00000227950	1.45788	3.49106	0.298542	11.6937	1.3725e-31	3.2755e-30	ENSG00000227950	AL590128.1
										ENSG00000231616	11.7163	1.55917	0.133338	11.6934	1.37829e-31	3.28772e-30	ENSG00000231616	AL354733.2
										ENSG00000269900	1.97788	4.16326	0.356066	11.6924	1.39465e-31	3.32514e-30	ENSG00000269900	RMRP
										ENSG00000229820	1.51122	3.06279	0.261967	11.6915	1.40828e-31	3.35601e-30	ENSG00000229820	CR391992.1
										ENSG00000109163	15.5229	1.38005	0.118066	11.6888	1.45436e-31	3.46246e-30	ENSG00000109163	GNRHR
										ENSG00000275379	3.41543	2.93164	0.250828	11.6878	1.47063e-31	3.49953e-30	ENSG00000275379	HIST1H3I
										ENSG00000225062	7.12226	1.38473	0.118482	11.6873	1.48011e-31	3.52038e-30	ENSG00000225062	CATIP-AS1
										ENSG00000280240	4.70366	2.13166	0.182412	11.6859	1.50396e-31	3.57365e-30	ENSG00000280240
										ENSG00000233860	8.44703	1.75992	0.150632	11.6836	1.54636e-31	3.67261e-30	ENSG00000233860	AC107072.2
										ENSG00000266146	2.84696	3.29755	0.282306	11.6808	1.59827e-31	3.79407e-30	ENSG00000266146	MIR5190
										ENSG00000271382	4.22743	1.51498	0.129723	11.6786	1.63965e-31	3.89044e-30	ENSG00000271382	AC012464.3
										ENSG00000270048	6.8341	1.60434	0.137406	11.676	1.69153e-31	4.01159e-30	ENSG00000270048	AC068790.4
										ENSG00000199676	2.43168	2.17852	0.186587	11.6756	1.69766e-31	4.0242e-30	ENSG00000199676	RF00019
										ENSG00000259398	1.92554	2.68819	0.230249	11.6751	1.70815e-31	4.04711e-30	ENSG00000259398	AC090970.1
										ENSG00000243621	2.63107	5.24981	0.44978	11.672	1.7729e-31	4.19851e-30	ENSG00000243621	AC003989.2
										ENSG00000225091	11.1555	1.51345	0.129667	11.6718	1.77722e-31	4.20672e-30	ENSG00000225091	SNORA71A
										ENSG00000278022	9.9272	2.15116	0.184324	11.6705	1.80301e-31	4.26571e-30	ENSG00000278022	AC118658.2
										ENSG00000278668	11.636	1.5717	0.134678	11.6701	1.81298e-31	4.28724e-30	ENSG00000278668	AC005899.7
										ENSG00000229023	4.66118	1.95991	0.167945	11.6699	1.81612e-31	4.29259e-30	ENSG00000229023	AC067945.1
										ENSG00000271437	1.61008	3.69882	0.316979	11.669	1.83595e-31	4.33322e-30	ENSG00000271437	AL356423.1
										ENSG00000275910	20.3882	1.28742	0.11038	11.6636	1.95708e-31	4.61471e-30	ENSG00000275910	AC138932.5
										ENSG00000228625	1.85881	3.53046	0.302784	11.66	2.04036e-31	4.80646e-30	ENSG00000228625	AL451047.1
										ENSG00000250860	2.8803	3.32297	0.285043	11.6578	2.09367e-31	4.92732e-30	ENSG00000250860	AC093225.1
										ENSG00000228169	3.71508	1.65794	0.142228	11.6569	2.11547e-31	4.97626e-30	ENSG00000228169	PPIAP19
										ENSG00000200842	1.51698	4.07896	0.349947	11.6559	2.13984e-31	5.03119e-30	ENSG00000200842	RF00019
										ENSG00000235683	2.7239	2.18244	0.187348	11.6491	2.31769e-31	5.44413e-30	ENSG00000235683	AC018442.1
										ENSG00000236992	11.2521	1.02352	0.0878722	11.6478	2.3542e-31	5.52726e-30	ENSG00000236992	RPL12P12
										ENSG00000179057	138.045	1.09828	0.0943024	11.6464	2.39401e-31	5.61806e-30	ENSG00000179057	IGSF22
										ENSG00000223401	35.628	1.36832	0.117515	11.6439	2.46605e-31	5.78434e-30	ENSG00000223401
										ENSG00000233189	1.41592	2.94118	0.252665	11.6406	2.56159e-31	6.00559e-30	ENSG00000233189	RPL12P29
										ENSG00000230604	2.1307	2.68631	0.230781	11.6401	2.57726e-31	6.03945e-30	ENSG00000230604	TSEN15P2
										ENSG00000228604	2.26559	2.54036	0.218258	11.6393	2.6026e-31	6.09593e-30	ENSG00000228604	AL121759.1
										ENSG00000232684	1.96755	3.75997	0.323161	11.635	2.73736e-31	6.40549e-30	ENSG00000232684	ATP11A-AS1
										ENSG00000228728	6.22408	1.71462	0.147373	11.6346	2.7492e-31	6.43012e-30	ENSG00000228728	PPIAP91
										ENSG00000237773	17.5385	1.12172	0.0964238	11.6333	2.79196e-31	6.52705e-30	ENSG00000237773	AC073332.1
										ENSG00000229046	1.75618	2.93393	0.252225	11.6322	2.82647e-31	6.60456e-30	ENSG00000229046	HMGN1P2
										ENSG00000262815	1.61703	2.79736	0.240496	11.6316	2.84644e-31	6.64808e-30	ENSG00000262815	AC087501.2
										ENSG00000224414	1.89785	4.00635	0.344483	11.63	2.89931e-31	6.75873e-30	ENSG00000224414	AC010886.1
										ENSG00000253720	3.18808	2.25572	0.193997	11.6277	2.98186e-31	6.9479e-30	ENSG00000253720	AC022973.2
										ENSG00000229853	3.0249	2.23933	0.192645	11.6241	3.10691e-31	7.23583e-30	ENSG00000229853	AL034418.1
										ENSG00000233401	1.40938	3.10504	0.2672	11.6206	3.23716e-31	7.53205e-30	ENSG00000233401	PRKAR1AP1
										ENSG00000267457	3.88503	1.88358	0.162101	11.6198	3.26875e-31	7.60197e-30	ENSG00000267457	AC004223.2
										ENSG00000203872	38.3751	1.06349	0.0915286	11.6192	3.29228e-31	7.64946e-30	ENSG00000203872	C6orf163
										ENSG00000053438	109.947	1.58223	0.136196	11.6173	3.36784e-31	7.81765e-30	ENSG00000053438	NNAT
										ENSG00000269388	19.8406	1.27216	0.109528	11.6149	3.4609e-31	8.02988e-30	ENSG00000269388	AC018755.3
										ENSG00000243280	3.73071	1.9638	0.169077	11.6148	3.46431e-31	8.03401e-30	ENSG00000243280	AC093663.2
										ENSG00000240163	4.14272	1.96981	0.169631	11.6123	3.56774e-31	8.26996e-30	ENSG00000240163	AC087385.1
										ENSG00000237903	6.2545	1.62061	0.139597	11.6092	3.70107e-31	8.57094e-30	ENSG00000237903	AC004000.1
										ENSG00000232455	1.8994	2.86353	0.246695	11.6076	3.77044e-31	8.72751e-30	ENSG00000232455	LARS2-AS1
										ENSG00000259359	1.56179	3.23139	0.278414	11.6064	3.82327e-31	8.84563e-30	ENSG00000259359	AC012409.1
										ENSG00000197714	195.279	1.29824	0.111871	11.6048	3.89745e-31	9.01301e-30	ENSG00000197714	ZNF460
										ENSG00000253043	1.31093	3.93451	0.339128	11.6018	4.03314e-31	9.32242e-30	ENSG00000253043	RNU7-181P
										ENSG00000249245	2.70236	2.01786	0.174026	11.5951	4.36132e-31	1.00668e-29	ENSG00000249245	NCOA4P3
										ENSG00000230696	1.23452	3.59767	0.310307	11.5939	4.42493e-31	1.02089e-29	ENSG00000230696	AC011753.2
										ENSG00000226627	5.64435	2.30689	0.19901	11.5919	4.53106e-31	1.04488e-29	ENSG00000226627	SHANK2-AS1
										ENSG00000232027	8.62982	1.5537	0.134066	11.589	4.68383e-31	1.0791e-29	ENSG00000232027	AL671986.1
										ENSG00000279600	2.53509	3.19166	0.275409	11.5888	4.69572e-31	1.08133e-29	ENSG00000279600	AC015804.1
										ENSG00000207117	1.30955	2.84665	0.245732	11.5844	4.94681e-31	1.13862e-29	ENSG00000207117	RF00019
										ENSG00000279338	355.567	1.69098	0.145989	11.583	5.0257e-31	1.15624e-29	ENSG00000279338
										ENSG00000232675	2.7665	2.46599	0.212954	11.5799	5.21205e-31	1.19799e-29	ENSG00000232675	AL121830.1
										ENSG00000267361	4.17906	2.30217	0.198826	11.5788	5.27641e-31	1.21222e-29	ENSG00000267361	SEC24AP1
										ENSG00000280163	6.80819	1.3058	0.112787	11.5776	5.35378e-31	1.22942e-29	ENSG00000280163	AC040160.2
										ENSG00000238086	4.88317	1.70764	0.1475	11.5772	5.37602e-31	1.23395e-29	ENSG00000238086	PPP1R26P1
										ENSG00000258930	1.57967	4.46282	0.385511	11.5764	5.42981e-31	1.24572e-29	ENSG00000258930	AC005230.1
										ENSG00000279459	11.5412	1.61504	0.139549	11.5733	5.62773e-31	1.29053e-29	ENSG00000279459	AP001271.2
										ENSG00000260641	47.8457	1.91285	0.165299	11.572	5.71105e-31	1.30902e-29	ENSG00000260641	AC114811.2
										ENSG00000238149	1.09954	3.19026	0.275697	11.5716	5.74069e-31	1.3152e-29	ENSG00000238149	AC104978.1
										ENSG00000235914	2.38588	3.83761	0.33166	11.5709	5.78738e-31	1.32528e-29	ENSG00000235914	MACROD2-AS1
										ENSG00000221439	2.3089	4.57151	0.395111	11.5702	5.83638e-31	1.33526e-29	ENSG00000221439	RNU4ATAC16P
										ENSG00000187260	185.449	1.27213	0.109978	11.5672	6.04465e-31	1.38163e-29	ENSG00000187260	WDR86
										ENSG00000200834	1.73261	3.13748	0.271294	11.5649	6.20908e-31	1.41855e-29	ENSG00000200834	RF00019
										ENSG00000265078	1.17579	3.45141	0.298456	11.5642	6.25747e-31	1.42894e-29	ENSG00000265078	RN7SL664P
										ENSG00000182196	88.3743	1.09442	0.0946498	11.5628	6.3567e-31	1.45093e-29	ENSG00000182196	ARL6IP4
										ENSG00000137872	608.879	1.51027	0.13064	11.5605	6.52967e-31	1.48903e-29	ENSG00000137872	SEMA6D
										ENSG00000254688	1.94847	4.9356	0.42694	11.5604	6.54084e-31	1.49089e-29	ENSG00000254688	AC013549.2
										ENSG00000213180	1.25774	2.99556	0.259156	11.5589	6.65428e-31	1.51604e-29	ENSG00000213180	RPL36AP48
										ENSG00000125631	5.26582	1.53795	0.133074	11.5572	6.79219e-31	1.54675e-29	ENSG00000125631	HTR5BP
										ENSG00000215223	2.36695	2.59294	0.224362	11.5569	6.8088e-31	1.54981e-29	ENSG00000215223	CYP51A1P3
										ENSG00000236031	4.02202	1.83596	0.158899	11.5543	7.02153e-31	1.59676e-29	ENSG00000236031	AL591721.1
										ENSG00000272211	15.1879	1.66233	0.143874	11.554	7.0437e-31	1.60032e-29	ENSG00000272211	AC114760.2
										ENSG00000240974	1.9784	2.48576	0.215157	11.5532	7.11129e-31	1.61493e-29	ENSG00000240974	RPS27AP10
										ENSG00000240873	1.52502	3.55694	0.307881	11.553	7.13021e-31	1.61848e-29	ENSG00000240873	RPS29P22
										ENSG00000171223	8928.5	1.03753	0.0898086	11.5527	7.15735e-31	1.62389e-29	ENSG00000171223	JUNB
										ENSG00000267551	4.37257	1.43635	0.124333	11.5524	7.17611e-31	1.6274e-29	ENSG00000267551	AC005264.1
										ENSG00000261837	3.40166	2.57704	0.223103	11.5509	7.3048e-31	1.65582e-29	ENSG00000261837	AC046158.2
										ENSG00000238025	2.40301	3.29948	0.285655	11.5506	7.3337e-31	1.66161e-29	ENSG00000238025	ZDHHC4P1
										ENSG00000258230	7.00588	1.63623	0.141678	11.5489	7.47653e-31	1.69319e-29	ENSG00000258230	AC063950.1
										ENSG00000225311	1.38025	3.811	0.330023	11.5477	7.5825e-31	1.7164e-29	ENSG00000225311	AL024474.2
										ENSG00000257150	32.3001	1.86478	0.16152	11.5452	7.80201e-31	1.76528e-29	ENSG00000257150	PGAM1P5
										ENSG00000255872	4.13567	1.61968	0.1403	11.5444	7.88086e-31	1.7823e-29	ENSG00000255872	AL138752.2
										ENSG00000223878	26.4575	1.13098	0.0979753	11.5436	7.95628e-31	1.79853e-29	ENSG00000223878	PPIAP53
										ENSG00000240808	2.76365	2.0047	0.173705	11.5408	8.2133e-31	1.85578e-29	ENSG00000240808	AC126389.1
										ENSG00000264217	1.64068	4.27461	0.370394	11.5407	8.22397e-31	1.85733e-29	ENSG00000264217	RPL35AP25
										ENSG00000170509	17.0095	1.73197	0.150123	11.537	8.58823e-31	1.93605e-29	ENSG00000170509	HSD17B13
										ENSG00000241568	2.25504	2.54404	0.220519	11.5366	8.62804e-31	1.94413e-29	ENSG00000241568	RN7SL338P
										ENSG00000257376	6.81508	1.36532	0.118406	11.5308	9.22398e-31	2.07746e-29	ENSG00000257376	AC079601.2
										ENSG00000228763	7.69652	1.50718	0.13073	11.529	9.42157e-31	2.12099e-29	ENSG00000228763	LIMS1-AS1
										ENSG00000278475	3.02745	2.00415	0.173864	11.5271	9.63175e-31	2.16732e-29	ENSG00000278475	AC009464.1
										ENSG00000213018	9.50242	1.45526	0.12625	11.5268	9.66396e-31	2.17357e-29	ENSG00000213018	AL590762.1
										ENSG00000184226	146.56	1.66788	0.144705	11.526	9.75362e-31	2.19274e-29	ENSG00000184226	PCDH9
										ENSG00000236324	1.52208	3.65392	0.317017	11.5259	9.76374e-31	2.19301e-29	ENSG00000236324	AL035634.1
										ENSG00000254274	3.6381	2.02464	0.175659	11.526	9.76271e-31	2.19301e-29	ENSG00000254274	TDGF1P5
										ENSG00000229715	27.6369	1.48962	0.129268	11.5236	1.00349e-30	2.2529e-29	ENSG00000229715	EEF1DP3
										ENSG00000224079	3.32924	1.99912	0.173544	11.5193	1.05413e-30	2.36442e-29	ENSG00000224079	AC091729.1
										ENSG00000261002	11.8695	1.42659	0.123845	11.5192	1.05574e-30	2.36694e-29	ENSG00000261002	AC036103.1
										ENSG00000206838	6.14818	1.6399	0.142385	11.5174	1.07844e-30	2.41564e-29	ENSG00000206838	SNORA5A
										ENSG00000270130	10.6496	1.35738	0.117878	11.5151	1.1067e-30	2.47782e-29	ENSG00000270130	AC068790.7
										ENSG00000254984	1.99564	2.86669	0.248973	11.5141	1.12082e-30	2.50828e-29	ENSG00000254984	FTLP6
										ENSG00000231615	1.48832	2.96547	0.257584	11.5126	1.13948e-30	2.5489e-29	ENSG00000231615	AL645568.2
										ENSG00000206199	3.24259	2.00821	0.174466	11.5106	1.16621e-30	2.60751e-29	ENSG00000206199	ANKUB1
										ENSG00000230684	1.55149	3.60356	0.313079	11.51	1.17421e-30	2.62301e-29	ENSG00000230684	AL158207.2
										ENSG00000254565	1.70084	4.36275	0.379102	11.5081	1.20063e-30	2.68081e-29	ENSG00000254565	MTND2P26
										ENSG00000235927	12.5959	1.18611	0.103084	11.5062	1.22726e-30	2.73779e-29	ENSG00000235927	NEXN-AS1
										ENSG00000267743	1.43497	3.95269	0.343612	11.5034	1.26868e-30	2.82891e-29	ENSG00000267743	AC107896.1
										ENSG00000258917	3.49963	2.02797	0.176311	11.5023	1.28469e-30	2.8633e-29	ENSG00000258917	ZMYND19P1
										ENSG00000239636	18.5259	1.05904	0.0920877	11.5004	1.31372e-30	2.92536e-29	ENSG00000239636	AC004865.2
										ENSG00000170967	1.47727	4.54758	0.395433	11.5002	1.31539e-30	2.92776e-29	ENSG00000170967	DDI1
										ENSG00000249647	1.91235	3.4886	0.303389	11.4987	1.33857e-30	2.97801e-29	ENSG00000249647	C5orf66-AS2
										ENSG00000234632	1.57059	3.08791	0.268578	11.4973	1.36167e-30	3.02803e-29	ENSG00000234632	NECAP1P2
										ENSG00000232824	1.6083	4.17756	0.363375	11.4966	1.37279e-30	3.05138e-29	ENSG00000232824	PRR13P1
										ENSG00000279380	2.86396	2.4208	0.210595	11.495	1.39713e-30	3.10408e-29	ENSG00000279380
										ENSG00000228879	3.25695	2.33241	0.202974	11.4912	1.46116e-30	3.24488e-29	ENSG00000228879	AL591848.1
										ENSG00000143858	35.0942	1.26278	0.109913	11.489	1.49883e-30	3.32703e-29	ENSG00000143858	SYT2
										ENSG00000234268	9.63518	1.14797	0.0999208	11.4888	1.50161e-30	3.33169e-29	ENSG00000234268	AP000936.3
										ENSG00000229990	2.99893	2.07639	0.180755	11.4873	1.5281e-30	3.38895e-29	ENSG00000229990	AC022400.2
										ENSG00000260536	6.29757	1.49901	0.130534	11.4837	1.59364e-30	3.5327e-29	ENSG00000260536	AL035071.2
										ENSG00000202081	2.11111	2.29313	0.199742	11.4804	1.6544e-30	3.66409e-29	ENSG00000202081	RNU6-1280P
										ENSG00000243314	1.67237	3.87225	0.337346	11.4786	1.69068e-30	3.73939e-29	ENSG00000243314	AC106707.2
										ENSG00000279106	2.27595	2.19037	0.190851	11.4769	1.72393e-30	3.81123e-29	ENSG00000279106	AC009093.7
										ENSG00000200065	1.55047	3.02714	0.263872	11.472	1.82413e-30	4.03093e-29	ENSG00000200065	RF00019
										ENSG00000222969	4.04384	6.20098	0.540547	11.4717	1.83105e-30	4.04259e-29	ENSG00000222969	RN7SKP8
										ENSG00000234607	1.331	3.67595	0.320446	11.4714	1.83726e-30	4.05449e-29	ENSG00000234607	AL355994.4
										ENSG00000229010	1.16958	3.35396	0.292382	11.4711	1.84211e-30	4.06336e-29	ENSG00000229010	AL161672.1
										ENSG00000238224	1.5532	4.01297	0.349938	11.4677	1.91764e-30	4.22807e-29	ENSG00000238224	AC104462.2
										ENSG00000264914	3.0124	2.50879	0.218774	11.4675	1.92088e-30	4.23332e-29	ENSG00000264914	AC015845.1
										ENSG00000231842	6.35013	1.6523	0.144138	11.4633	2.01572e-30	4.4364e-29	ENSG00000231842	AC020559.1
										ENSG00000270706	4.22306	1.57843	0.13774	11.4595	2.10651e-30	4.63413e-29	ENSG00000270706	PRMT1P1
										ENSG00000226440	8.44098	1.33597	0.116591	11.4586	2.12841e-30	4.68023e-29	ENSG00000226440	AL365214.2
										ENSG00000253439	2.58096	1.86438	0.162707	11.4585	2.13139e-30	4.68469e-29	ENSG00000253439	CDC42P5
										ENSG00000124194	15.0583	1.83449	0.160101	11.4583	2.13553e-30	4.69169e-29	ENSG00000124194	GDAP1L1
										ENSG00000272137	4.20365	1.56775	0.136862	11.4549	2.22121e-30	4.87774e-29	ENSG00000272137	AL451064.1
										ENSG00000263606	6.1524	1.5718	0.13725	11.4521	2.29522e-30	5.03802e-29	ENSG00000263606	AP000919.1
										ENSG00000276170	17.0498	1.37338	0.119928	11.4517	2.3047e-30	5.05659e-29	ENSG00000276170	AC244153.1
										ENSG00000228598	2.47627	2.84742	0.248666	11.4508	2.33074e-30	5.11143e-29	ENSG00000228598	MACC1-AS1
										ENSG00000254582	1.94934	2.93231	0.256086	11.4505	2.33781e-30	5.12465e-29	ENSG00000254582	PSMA2P1
										ENSG00000005243	1003.16	1.01499	0.0886571	11.4485	2.39194e-30	5.23865e-29	ENSG00000005243	COPZ2
										ENSG00000236489	3.82236	1.91528	0.167329	11.4462	2.45742e-30	5.37489e-29	ENSG00000236489	AC133473.1
										ENSG00000188747	831.536	1.13081	0.0987982	11.4457	2.47199e-30	5.40434e-29	ENSG00000188747	NOXA1
										ENSG00000279404	4.25455	2.27907	0.199126	11.4454	2.47998e-30	5.41941e-29	ENSG00000279404	AC008739.5
										ENSG00000250602	22.1631	1.23773	0.108157	11.4438	2.52636e-30	5.51588e-29	ENSG00000250602	AC093535.1
										ENSG00000278330	20.6163	1.27277	0.111225	11.4432	2.54373e-30	5.55132e-29	ENSG00000278330	AC018529.2
										ENSG00000273870	4.04902	1.73971	0.152031	11.4431	2.54499e-30	5.55163e-29	ENSG00000273870	AL138721.1
										ENSG00000215386	192.367	1.24719	0.109033	11.4387	2.67864e-30	5.84057e-29	ENSG00000215386	MIR99AHG
										ENSG00000279745	1.38556	3.73717	0.326764	11.4369	2.73522e-30	5.96129e-29	ENSG00000279745
										ENSG00000251972	1.40495	3.60369	0.31512	11.4359	2.76548e-30	6.02459e-29	ENSG00000251972	RNU6-123P
										ENSG00000252874	3.11587	1.80088	0.157497	11.4343	2.81752e-30	6.13523e-29	ENSG00000252874	RF00019
										ENSG00000142515	34.9618	3.27302	0.286288	11.4326	2.87317e-30	6.25365e-29	ENSG00000142515	KLK3
										ENSG00000270427	16.405	1.38879	0.121479	11.4324	2.88073e-30	6.26734e-29	ENSG00000270427	NRBF2P5
										ENSG00000230497	1.70176	4.33171	0.378919	11.4318	2.90153e-30	6.3098e-29	ENSG00000230497	EEF1B2P8
										ENSG00000215030	499.357	1.16316	0.10175	11.4315	2.90972e-30	6.32482e-29	ENSG00000215030	RPL13P12
										ENSG00000235917	2.15988	2.58551	0.226175	11.4314	2.9128e-30	6.32873e-29	ENSG00000235917	MTCO2P11
										ENSG00000184709	262.039	1.9488	0.170537	11.4275	3.04915e-30	6.61621e-29	ENSG00000184709	LRRC26
										ENSG00000243005	1.76037	4.25752	0.372619	11.4259	3.10367e-30	6.73155e-29	ENSG00000243005	RN7SL16P
										ENSG00000281021	9.55905	1.43667	0.125811	11.4193	3.35001e-30	7.25943e-29	ENSG00000281021	AL078581.3
										ENSG00000255660	4.87924	2.45489	0.214986	11.4188	3.36694e-30	7.28972e-29	ENSG00000255660	RERG-AS1
										ENSG00000252707	1.87732	4.88388	0.427801	11.4162	3.46953e-30	7.50522e-29	ENSG00000252707	RNU11-2P
										ENSG00000235145	2.73939	1.95588	0.171343	11.415	3.51904e-30	7.60898e-29	ENSG00000235145	RPSAP16
										ENSG00000243609	1.84572	2.56693	0.224883	11.4145	3.53845e-30	7.64759e-29	ENSG00000243609	RPS2P44
										ENSG00000228686	13.623	1.25155	0.109649	11.4142	3.55236e-30	7.67427e-29	ENSG00000228686	AL590723.1
										ENSG00000279891	9.2627	2.44695	0.214382	11.414	3.56117e-30	7.68994e-29	ENSG00000279891	AC022498.2
										ENSG00000241395	1.16601	3.44596	0.301942	11.4126	3.61585e-30	7.80459e-29	ENSG00000241395	RN7SL344P
										ENSG00000208308	1.91809	4.38636	0.384368	11.4119	3.64673e-30	7.8678e-29	ENSG00000208308	SNORA40B
										ENSG00000274737	7.12738	1.39599	0.122359	11.409	3.77081e-30	8.12837e-29	ENSG00000274737	AC004466.2
										ENSG00000253973	14.96	2.56504	0.224838	11.4084	3.7976e-30	8.18253e-29	ENSG00000253973	AC079296.1
										ENSG00000229463	2.75256	2.44214	0.214252	11.3984	4.25775e-30	9.15798e-29	ENSG00000229463	LYST-AS1
										ENSG00000240198	1.76342	4.5115	0.395962	11.3938	4.49062e-30	9.64621e-29	ENSG00000240198	ARHGEF3-AS1
										ENSG00000279665	1.2341	3.33512	0.292784	11.3911	4.63364e-30	9.9423e-29	ENSG00000279665	AC012100.3
										ENSG00000138080	5234.82	1.11636	0.0980028	11.3911	4.63177e-30	9.9423e-29	ENSG00000138080	EMILIN1
										ENSG00000140398	953.463	1.01726	0.0893037	11.391	4.63452e-30	9.9423e-29	ENSG00000140398	NEIL1
										ENSG00000199806	1.64479	3.15048	0.276671	11.3871	4.84935e-30	1.03896e-28	ENSG00000199806	RNA5SP491
										ENSG00000271590	13.3433	1.45263	0.127578	11.3862	4.89841e-30	1.04901e-28	ENSG00000271590	AC108463.3
										ENSG00000271075	5.96944	1.97953	0.173888	11.3839	5.03018e-30	1.07583e-28	ENSG00000271075	AL139317.4
										ENSG00000230799	4.21081	1.54561	0.135783	11.383	5.08433e-30	1.08694e-28	ENSG00000230799	AC007279.1
										ENSG00000206728	2.60948	2.32138	0.203974	11.3807	5.21559e-30	1.11403e-28	ENSG00000206728	RF00019
										ENSG00000249740	19.6085	1.254	0.110187	11.3806	5.2255e-30	1.11567e-28	ENSG00000249740	OSMR-AS1
										ENSG00000229127	40.3321	1.10134	0.0967815	11.3796	5.28115e-30	1.12706e-28	ENSG00000229127	AC007038.1
										ENSG00000232830	1.47686	4.01237	0.35262	11.3788	5.33563e-30	1.1377e-28	ENSG00000232830	AC110994.1
										ENSG00000242412	4.71496	1.30095	0.114416	11.3704	5.87514e-30	1.25165e-28	ENSG00000242412	DBIL5P2
										ENSG00000276393	1.22795	3.87753	0.341034	11.3699	5.90428e-30	1.25732e-28	ENSG00000276393	AC105429.2
										ENSG00000104921	48.1663	2.44166	0.214764	11.369	5.96455e-30	1.2696e-28	ENSG00000104921	FCER2
										ENSG00000257058	8.61073	1.19959	0.105519	11.3684	6.00722e-30	1.27813e-28	ENSG00000257058	AP001363.2
										ENSG00000166428	474.517	1.22981	0.108188	11.3674	6.07699e-30	1.29242e-28	ENSG00000166428	PLD4
										ENSG00000279289	48.6683	1.88566	0.165904	11.3659	6.1801e-30	1.31321e-28	ENSG00000279289	AL136164.3
										ENSG00000281358	17.7979	1.04175	0.091661	11.3652	6.23032e-30	1.32331e-28	ENSG00000281358	RASSF1-AS1
										ENSG00000266467	1.37754	3.82017	0.336255	11.3609	6.54379e-30	1.3881e-28	ENSG00000266467	RN7SL220P
										ENSG00000276012	4.06031	1.77566	0.1563	11.3606	6.56848e-30	1.39273e-28	ENSG00000276012	AL160153.1
										ENSG00000244232	1.44928	3.54319	0.311908	11.3597	6.63381e-30	1.40598e-28	ENSG00000244232	RN7SL698P
										ENSG00000280028	2.03313	2.61107	0.229861	11.3593	6.66595e-30	1.41218e-28	ENSG00000280028	AC007431.3
										ENSG00000264916	1.4691	3.67786	0.323796	11.3586	6.72251e-30	1.42355e-28	ENSG00000264916	RN7SL230P
										ENSG00000231521	2.85568	1.77331	0.156132	11.3578	6.78525e-30	1.43622e-28	ENSG00000231521	AL162385.2
										ENSG00000226669	4.27089	1.66508	0.146625	11.356	6.92249e-30	1.46464e-28	ENSG00000226669	AL354977.1
										ENSG00000226744	2.61663	2.20157	0.193887	11.3549	7.00875e-30	1.48225e-28	ENSG00000226744	AC005326.1
										ENSG00000229666	23.0061	1.26563	0.111462	11.3548	7.01958e-30	1.48391e-28	ENSG00000229666	MAST4-AS1
										ENSG00000228000	2.12622	2.71736	0.239349	11.3531	7.15812e-30	1.51254e-28	ENSG00000228000	RPL7AP65
										ENSG00000182584	182.053	1.01187	0.0891347	11.3521	7.2398e-30	1.52915e-28	ENSG00000182584	ACTL10
										ENSG00000275538	3.05208	2.45315	0.216103	11.3518	7.2683e-30	1.53451e-28	ENSG00000275538	RNVU1-19
										ENSG00000273444	2.40431	2.15304	0.189673	11.3513	7.30585e-30	1.54178e-28	ENSG00000273444	AC006023.2
										ENSG00000267006	5.10581	1.89999	0.167441	11.3472	7.65513e-30	1.6141e-28	ENSG00000267006	AC008507.2
										ENSG00000264630	2.12327	4.86883	0.429283	11.3418	8.147e-30	1.71561e-28	ENSG00000264630	PRKCA-AS1
										ENSG00000223770	2.80857	3.13124	0.27616	11.3385	8.45765e-30	1.78026e-28	ENSG00000223770	AC006145.1
										ENSG00000126264	220.987	1.19318	0.105248	11.3368	8.62127e-30	1.81393e-28	ENSG00000126264	HCST
										ENSG00000006788	33.5384	1.40434	0.123883	11.336	8.69962e-30	1.82885e-28	ENSG00000006788	MYH13
										ENSG00000232374	2.22212	2.28394	0.201486	11.3355	8.75158e-30	1.83899e-28	ENSG00000232374	GPR79
										ENSG00000261386	14.4502	1.32453	0.116865	11.3339	8.91539e-30	1.87261e-28	ENSG00000261386	AC027682.4
										ENSG00000116194	201.399	1.42676	0.125896	11.3329	9.01565e-30	1.89286e-28	ENSG00000116194	ANGPTL1
										ENSG00000277151	20.7684	1.09207	0.0963898	11.3297	9.35491e-30	1.96326e-28	ENSG00000277151	AL138820.1
										ENSG00000257509	14.8426	1.1614	0.102517	11.3288	9.44419e-30	1.98115e-28	ENSG00000257509	AC073487.1
										ENSG00000229321	3.55671	2.0014	0.176705	11.3262	9.73128e-30	2.03963e-28	ENSG00000229321	AC008269.1
										ENSG00000234995	1.52242	3.16539	0.279482	11.3259	9.7625e-30	2.04531e-28	ENSG00000234995	AC013429.2
										ENSG00000271858	115.203	1.17514	0.103776	11.3238	1.00066e-29	2.09555e-28	ENSG00000271858	Z84492.1
										ENSG00000055955	24.016	1.08406	0.0957363	11.3234	1.00549e-29	2.10478e-28	ENSG00000055955	ITIH4
										ENSG00000260253	10.2428	1.88634	0.166617	11.3214	1.02783e-29	2.1497e-28	ENSG00000260253	AC084262.1
										ENSG00000261668	7.66372	1.50028	0.13252	11.3212	1.03082e-29	2.15505e-28	ENSG00000261668	AC093591.2
										ENSG00000253264	1.52527	3.54359	0.313083	11.3184	1.06436e-29	2.22233e-28	ENSG00000253264
										ENSG00000214549	1.40706	2.52894	0.223463	11.317	1.08101e-29	2.25615e-28	ENSG00000214549	SDHCP2
										ENSG00000260012	3.35004	2.08292	0.184067	11.3161	1.09238e-29	2.27698e-28	ENSG00000260012	AC007494.1
										ENSG00000280048	1.68861	2.51502	0.222259	11.3157	1.09712e-29	2.28588e-28	ENSG00000280048	AC012409.5
										ENSG00000088882	2188.01	1.27321	0.11252	11.3154	1.10117e-29	2.29336e-28	ENSG00000088882	CPXM1
										ENSG00000257169	1.90369	4.43492	0.391953	11.3149	1.10675e-29	2.30402e-28	ENSG00000257169	AC125612.1
										ENSG00000199753	55.1474	1.54111	0.136278	11.3085	1.19073e-29	2.47465e-28	ENSG00000199753	SNORD104
										ENSG00000251405	7.89844	1.54778	0.136903	11.3057	1.2299e-29	2.5539e-28	ENSG00000251405	AC008676.2
										ENSG00000273133	11.3002	1.14604	0.101427	11.2991	1.32526e-29	2.74844e-28	ENSG00000273133	AC116651.1
										ENSG00000265394	2.2226	2.18013	0.192955	11.2987	1.33205e-29	2.76136e-28	ENSG00000265394	AC104984.2
										ENSG00000227006	9.35055	1.48703	0.131612	11.2986	1.33322e-29	2.76262e-28	ENSG00000227006	AL136988.2
										ENSG00000162426	175.061	1.01834	0.0901493	11.2961	1.37172e-29	2.8412e-28	ENSG00000162426	SLC45A1
										ENSG00000180139	172.241	1.33392	0.118126	11.2923	1.43205e-29	2.96366e-28	ENSG00000180139	ACTA2-AS1
										ENSG00000214998	1.46117	3.18051	0.281684	11.291	1.45329e-29	3.00635e-28	ENSG00000214998	CCNB2P1
										ENSG00000219532	1.27079	3.3973	0.300918	11.2898	1.47392e-29	3.04648e-28	ENSG00000219532	SELENOKP2
										ENSG00000274614	2.09646	4.6621	0.413006	11.2882	1.50094e-29	3.10103e-28	ENSG00000274614	AL390754.1
										ENSG00000254165	27.512	1.27575	0.113028	11.2871	1.51981e-29	3.1387e-28	ENSG00000254165	AC090739.1
										ENSG00000139914	20.7424	1.09387	0.0969139	11.287	1.52178e-29	3.14144e-28	ENSG00000139914	FITM1
										ENSG00000267503	17.6406	1.78623	0.158277	11.2855	1.54787e-29	3.19396e-28	ENSG00000267503	AP005131.3
										ENSG00000260903	26.7275	2.55491	0.226423	11.2838	1.57762e-29	3.25399e-28	ENSG00000260903	XKR7
										ENSG00000268058	3.28528	1.97226	0.174878	11.2779	1.68689e-29	3.47645e-28	ENSG00000268058	BNIP3P40
										ENSG00000235613	3.89851	1.67878	0.14887	11.2769	1.70726e-29	3.51695e-28	ENSG00000235613	NSRP1P1
										ENSG00000237039	277.124	1.05517	0.0935709	11.2767	1.71085e-29	3.52288e-28	ENSG00000237039	AC018738.1
										ENSG00000243373	1.71455	4.51285	0.400221	11.2759	1.72633e-29	3.55326e-28	ENSG00000243373	RN7SL173P
										ENSG00000279340	1.56479	3.26759	0.289802	11.2753	1.73856e-29	3.57695e-28	ENSG00000279340	AC090617.7
										ENSG00000269365	5.52944	1.96803	0.174606	11.2712	1.82035e-29	3.74365e-28	ENSG00000269365	AC120349.1
										ENSG00000269997	12.9338	1.37769	0.122276	11.2671	1.90771e-29	3.92005e-28	ENSG00000269997	AC068790.3
										ENSG00000180116	1.7393	3.01945	0.268002	11.2665	1.92011e-29	3.94318e-28	ENSG00000180116	C12orf40
										ENSG00000275443	2.09684	2.69068	0.238825	11.2664	1.92357e-29	3.94768e-28	ENSG00000275443	AC012409.2
										ENSG00000130595	72.1076	1.81254	0.160889	11.2658	1.93642e-29	3.97239e-28	ENSG00000130595	TNNT3
										ENSG00000222012	13.5144	1.76113	0.156359	11.2634	1.98967e-29	4.07825e-28	ENSG00000222012	AC005481.1
										ENSG00000199562	2.87233	2.00087	0.17767	11.2618	2.0269e-29	4.15283e-28	ENSG00000199562	RNU6-37P
										ENSG00000223492	2.18302	4.963	0.440701	11.2616	2.03026e-29	4.15798e-28	ENSG00000223492	AL391097.1
										ENSG00000163630	2.31333	2.84404	0.25255	11.2613	2.03713e-29	4.16858e-28	ENSG00000163630	SYNPR
										ENSG00000261394	2.09147	2.9591	0.262777	11.2609	2.04765e-29	4.18836e-28	ENSG00000261394	AC007598.2
										ENSG00000277394	34.2261	1.28628	0.114238	11.2597	2.07561e-29	4.2438e-28	ENSG00000277394
										ENSG00000229622	1.79137	3.6195	0.321596	11.2548	2.19266e-29	4.47939e-28	ENSG00000229622	MTND5P2
										ENSG00000281383	42.1935	1.41832	0.126034	11.2535	2.22633e-29	4.54442e-28	ENSG00000281383	FP671120.4
										ENSG00000213757	94.9912	1.20527	0.107184	11.2449	2.4551e-29	5.00308e-28	ENSG00000213757	AC020898.1
										ENSG00000241007	3.09771	1.8164	0.161573	11.242	2.53616e-29	5.164e-28	ENSG00000241007	SEPT7P6
										ENSG00000183324	2.33262	1.99283	0.177298	11.24	2.5931e-29	5.27557e-28	ENSG00000183324	REC114
										ENSG00000239648	1.22891	3.53291	0.314343	11.239	2.62259e-29	5.33335e-28	ENSG00000239648	MTND1P3
										ENSG00000279077	5.14077	1.6418	0.146098	11.2377	2.66372e-29	5.41252e-28	ENSG00000279077	AC023090.2
										ENSG00000278487	1.07555	3.13899	0.279331	11.2375	2.66771e-29	5.4184e-28	ENSG00000278487	AC106800.4
										ENSG00000103254	868.596	1.03146	0.0917903	11.2372	2.67811e-29	5.43729e-28	ENSG00000103254	FAM173A
										ENSG00000202374	1.71138	2.67888	0.238398	11.237	2.68305e-29	5.44507e-28	ENSG00000202374	RF00091
										ENSG00000261692	1.36396	3.50276	0.311724	11.2367	2.69149e-29	5.45994e-28	ENSG00000261692	AC092120.1
										ENSG00000232751	1.46066	2.37562	0.211428	11.236	2.71258e-29	5.50045e-28	ENSG00000232751	AL645568.3
										ENSG00000108309	160.691	1.88939	0.168166	11.2353	2.73714e-29	5.54799e-28	ENSG00000108309	RUNDC3A
										ENSG00000256325	2.969	2.10653	0.18754	11.2324	2.82591e-29	5.72555e-28	ENSG00000256325	AC025423.1
										ENSG00000202184	1.55134	4.25878	0.379233	11.23	2.90564e-29	5.88468e-28	ENSG00000202184	RNU6-1283P
										ENSG00000242808	38.0914	1.46069	0.130093	11.2281	2.96928e-29	6.00862e-28	ENSG00000242808	SOX2-OT
										ENSG00000241158	42.1252	1.55065	0.138112	11.2275	2.98932e-29	6.04668e-28	ENSG00000241158	ADAMTS9-AS1
										ENSG00000279424	7.62267	1.4652	0.13052	11.2259	3.04407e-29	6.14984e-28	ENSG00000279424
										ENSG00000276075	48.463	1.23479	0.110021	11.2232	3.13725e-29	6.33031e-28	ENSG00000276075	AC027682.6
										ENSG00000263624	6.07761	1.62829	0.145084	11.2231	3.14033e-29	6.33391e-28	ENSG00000263624	AC055811.1
										ENSG00000231699	1.51494	2.83447	0.25259	11.2216	3.19428e-29	6.4401e-28	ENSG00000231699	AC020550.1
										ENSG00000242559	1.46701	3.90395	0.347954	11.2197	3.26255e-29	6.57504e-28	ENSG00000242559	RN7SL144P
										ENSG00000213316	2.42322	1.82115	0.162381	11.2153	3.43141e-29	6.90122e-28	ENSG00000213316	LTC4S
										ENSG00000278576	21.3771	1.09554	0.097702	11.2131	3.51737e-29	7.07123e-28	ENSG00000278576	AL162171.3
										ENSG00000263220	7.17595	1.45444	0.129711	11.213	3.52231e-29	7.07827e-28	ENSG00000263220	AC015727.1
										ENSG00000271919	1.78804	3.25341	0.290161	11.2124	3.54352e-29	7.11797e-28	ENSG00000271919	AC005828.7
										ENSG00000220793	20.6107	1.22224	0.109051	11.208	3.72576e-29	7.47489e-28	ENSG00000220793	RPL21P119
										ENSG00000278588	4.16145	2.44967	0.218607	11.2058	3.81881e-29	7.65222e-28	ENSG00000278588	HIST1H2BI
										ENSG00000271986	1.53224	2.35609	0.21028	11.2045	3.87489e-29	7.76144e-28	ENSG00000271986	RN7SL827P
										ENSG00000235488	6.8136	1.3906	0.124117	11.2039	3.90057e-29	7.80971e-28	ENSG00000235488	JARID2-AS1
										ENSG00000237774	9.02719	1.14383	0.102105	11.2025	3.9643e-29	7.93086e-28	ENSG00000237774	AC126615.1
										ENSG00000264472	1.76842	2.57766	0.230103	11.2022	3.97842e-29	7.95587e-28	ENSG00000264472	AC096708.2
										ENSG00000216802	1.80398	2.62512	0.234451	11.1969	4.22277e-29	8.43766e-28	ENSG00000216802	AL590617.1
										ENSG00000235957	5.37339	1.267	0.113205	11.1921	4.45567e-29	8.8922e-28	ENSG00000235957	COX7CP1
										ENSG00000244945	29.8528	1.02877	0.0919413	11.1894	4.59503e-29	9.1629e-28	ENSG00000244945	AC136604.2
										ENSG00000279852	7.52759	1.46185	0.130667	11.1876	4.69112e-29	9.34693e-28	ENSG00000279852	AC083964.2
										ENSG00000233729	2.21345	2.90276	0.259564	11.1832	4.92611e-29	9.80325e-28	ENSG00000233729	AC016909.2
										ENSG00000225505	1.90619	3.85874	0.345075	11.1823	4.97747e-29	9.90144e-28	ENSG00000225505	AC104332.1
										ENSG00000168490	92.7017	1.24952	0.111757	11.1806	5.07179e-29	1.0085e-27	ENSG00000168490	PHYHIP
										ENSG00000228779	6.73955	1.43158	0.128066	11.1785	5.19802e-29	1.03277e-27	ENSG00000228779	Z69666.1
										ENSG00000259090	1.45973	2.97879	0.266489	11.1779	5.23052e-29	1.0388e-27	ENSG00000259090	SEPT7P1
										ENSG00000130751	104.035	1.21983	0.109133	11.1775	5.25517e-29	1.04328e-27	ENSG00000130751	NPAS1
										ENSG00000223884	3.05482	2.08419	0.186496	11.1755	5.37347e-29	1.06633e-27	ENSG00000223884	AC068481.1
										ENSG00000272489	2.67889	2.04152	0.182793	11.1685	5.81749e-29	1.15166e-27	ENSG00000272489	AL132656.3
										ENSG00000008226	77.3837	1.20635	0.108032	11.1666	5.93916e-29	1.17528e-27	ENSG00000008226	DLEC1
										ENSG00000177133	20.0072	1.39188	0.124695	11.1623	6.23797e-29	1.23391e-27	ENSG00000177133	LINC00982
										ENSG00000256195	2.87861	2.07943	0.186308	11.1613	6.30771e-29	1.2472e-27	ENSG00000256195	AP002518.1
										ENSG00000249212	5.15077	1.52429	0.136577	11.1606	6.35581e-29	1.25621e-27	ENSG00000249212	ATP1B1P1
										ENSG00000280381	4.09634	1.92932	0.172875	11.1603	6.38068e-29	1.26062e-27	ENSG00000280381	AC026362.2
										ENSG00000226797	3.12977	2.25135	0.201739	11.1598	6.41661e-29	1.26721e-27	ENSG00000226797	AC005828.1
										ENSG00000270690	2.18007	2.05868	0.184553	11.155	6.77192e-29	1.33524e-27	ENSG00000270690	AC105129.3
										ENSG00000256436	12.6507	1.55366	0.139293	11.1539	6.8571e-29	1.35095e-27	ENSG00000256436	TAS2R31
										ENSG00000267758	3.84746	2.02817	0.181887	11.1507	7.10685e-29	1.39848e-27	ENSG00000267758	AC099811.4
										ENSG00000270614	8.91102	1.49866	0.134407	11.1502	7.14665e-29	1.40554e-27	ENSG00000270614	AC011451.2
										ENSG00000207181	9.98257	1.70244	0.15273	11.1468	7.42542e-29	1.45883e-27	ENSG00000207181	SNORA14B
										ENSG00000163072	1644	1.21503	0.109026	11.1444	7.62201e-29	1.49626e-27	ENSG00000163072	NOSTRIN
										ENSG00000162947	1.31468	3.14235	0.282013	11.1425	7.78686e-29	1.5274e-27	ENSG00000162947	LINC01931
										ENSG00000264273	1.61391	2.39133	0.214626	11.1418	7.84993e-29	1.53916e-27	ENSG00000264273	AC107982.2
										ENSG00000259528	1.60447	2.79041	0.250459	11.1412	7.90447e-29	1.54862e-27	ENSG00000259528	AC068397.1
										ENSG00000253112	2.00738	2.24394	0.201441	11.1394	8.06482e-29	1.57878e-27	ENSG00000253112	AC102945.1
										ENSG00000236867	3.51069	2.16744	0.194579	11.1391	8.09148e-29	1.58337e-27	ENSG00000236867	Z98885.1
										ENSG00000274885	1.87916	2.46691	0.221474	11.1386	8.13656e-29	1.59156e-27	ENSG00000274885	AC087241.4
										ENSG00000174501	280.208	1.24288	0.111583	11.1385	8.1441e-29	1.5924e-27	ENSG00000174501	ANKRD36C
										ENSG00000244604	3.02019	1.70356	0.153033	11.1319	8.77315e-29	1.71404e-27	ENSG00000244604	AC025518.1
										ENSG00000248758	1.73568	2.47461	0.222315	11.1311	8.85329e-29	1.72901e-27	ENSG00000248758	AC008883.1
										ENSG00000233460	1.434	3.61144	0.32445	11.131	8.86587e-29	1.73078e-27	ENSG00000233460	RPL35AP31
										ENSG00000199824	1.40626	2.94095	0.264245	11.1296	9.00113e-29	1.75579e-27	ENSG00000199824	RNU6-199P
										ENSG00000279589	3.21701	1.8756	0.168544	11.1282	9.14409e-29	1.78227e-27	ENSG00000279589	AC079416.2
										ENSG00000180189	9.4604	1.35551	0.121858	11.1237	9.62505e-29	1.87527e-27	ENSG00000180189	HMGB1P14
										ENSG00000257769	2.17303	2.31628	0.208265	11.1218	9.83142e-29	1.91472e-27	ENSG00000257769	AC026401.1
										ENSG00000248155	1.33168	4.18862	0.37667	11.1201	1.00106e-28	1.94807e-27	ENSG00000248155	CR545473.1
										ENSG00000242797	5.60928	1.58113	0.142193	11.1196	1.00676e-28	1.95838e-27	ENSG00000242797	GLYCTK-AS1
										ENSG00000231739	1.96713	2.34928	0.211297	11.1184	1.02069e-28	1.98469e-27	ENSG00000231739	GAPDHP59
										ENSG00000235169	165.375	1.11361	0.100167	11.1176	1.03046e-28	2.0029e-27	ENSG00000235169	SMIM1
										ENSG00000207484	1.00691	3.21543	0.289231	11.1172	1.03508e-28	2.0111e-27	ENSG00000207484	RF00019
										ENSG00000265128	1.43988	4.11828	0.3706	11.1125	1.09099e-28	2.11723e-27	ENSG00000265128	AC016866.2
										ENSG00000214760	2.39731	1.85412	0.166865	11.1115	1.10286e-28	2.13941e-27	ENSG00000214760	RPL21P1
										ENSG00000213440	3.13791	2.03255	0.182939	11.1105	1.11487e-28	2.16186e-27	ENSG00000213440	H2AFZP1
										ENSG00000100604	257.065	3.14744	0.283308	11.1096	1.12662e-28	2.18379e-27	ENSG00000100604	CHGA
										ENSG00000272175	2.29248	1.76888	0.159223	11.1094	1.1288e-28	2.18627e-27	ENSG00000272175	AL050343.2
										ENSG00000207750	2.39023	1.99152	0.179263	11.1094	1.12866e-28	2.18627e-27	ENSG00000207750	MIR553
										ENSG00000270760	6.72285	1.2273	0.110489	11.1078	1.14903e-28	2.22372e-27	ENSG00000270760	AD001527.1
										ENSG00000206715	1.51016	3.11086	0.280091	11.1066	1.16485e-28	2.25344e-27	ENSG00000206715	RNU6-444P
										ENSG00000230837	1.70621	1.91281	0.17224	11.1055	1.17959e-28	2.27927e-27	ENSG00000230837	RPL31P2
										ENSG00000267610	2.29888	2.70643	0.243774	11.1022	1.22398e-28	2.36413e-27	ENSG00000267610	AC007787.1
										ENSG00000130173	11.4255	1.65518	0.14909	11.1019	1.22827e-28	2.37055e-27	ENSG00000130173	ANGPTL8
										ENSG00000239576	1.5172	4.03454	0.363421	11.1016	1.23245e-28	2.37769e-27	ENSG00000239576	COX6CP14
										ENSG00000281201	1.90286	2.31375	0.208497	11.0972	1.29376e-28	2.49304e-27	ENSG00000281201
										ENSG00000237972	6.20102	1.50695	0.135799	11.0969	1.29932e-28	2.50179e-27	ENSG00000237972	TUBG1P
										ENSG00000266126	5.47864	1.57668	0.142123	11.0938	1.34486e-28	2.58744e-27	ENSG00000266126	AC005730.3
										ENSG00000278811	46.2638	1.33884	0.120686	11.0936	1.34816e-28	2.59279e-27	ENSG00000278811	LINC00624
										ENSG00000233862	5.62156	1.22574	0.110499	11.0928	1.35985e-28	2.61425e-27	ENSG00000233862	AC016907.2
										ENSG00000254431	3.80406	1.81992	0.164081	11.0916	1.37822e-28	2.64543e-27	ENSG00000254431	AC084083.1
										ENSG00000181322	26.0563	1.22319	0.110281	11.0916	1.37814e-28	2.64543e-27	ENSG00000181322	NME9
										ENSG00000278818	1.48245	3.84925	0.347101	11.0897	1.40729e-28	2.69913e-27	ENSG00000278818	RF00017
										ENSG00000257084	233.968	1.03539	0.0933728	11.0888	1.42159e-28	2.72548e-27	ENSG00000257084	MIR200CHG
										ENSG00000099834	14.7086	1.65729	0.149458	11.0887	1.42383e-28	2.72872e-27	ENSG00000099834	CDHR5
										ENSG00000278099	2.2102	5.28244	0.476532	11.0852	1.48042e-28	2.83608e-27	ENSG00000278099	RF00003
										ENSG00000223403	9.79483	1.49173	0.134571	11.0851	1.48263e-28	2.83919e-27	ENSG00000223403	MEG9
										ENSG00000276645	1.67865	2.91782	0.263241	11.0842	1.49671e-28	2.86504e-27	ENSG00000276645	RF00017
										ENSG00000167992	49.4461	1.11029	0.100222	11.0783	1.599e-28	3.05848e-27	ENSG00000167992	VWCE
										ENSG00000234473	2.78525	1.96287	0.177201	11.0771	1.61998e-28	3.0974e-27	ENSG00000234473	ZNF101P2
										ENSG00000224117	2.68389	1.99801	0.180376	11.0769	1.62416e-28	3.10418e-27	ENSG00000224117	PTPN2P2
										ENSG00000269102	5.96043	1.33429	0.120536	11.0696	1.76129e-28	3.36235e-27	ENSG00000269102	AC010320.3
										ENSG00000260378	1.63325	4.3807	0.39578	11.0685	1.78313e-28	3.40142e-27	ENSG00000260378	AC109597.1
										ENSG00000258640	2.95121	1.59019	0.143683	11.0674	1.8054e-28	3.44257e-27	ENSG00000258640	RPL21P5
										ENSG00000228634	11.8528	1.71744	0.155191	11.0666	1.82114e-28	3.46989e-27	ENSG00000228634	AL136115.1
										ENSG00000201772	13.3239	1.24859	0.112846	11.0646	1.86362e-28	3.54809e-27	ENSG00000201772	SNORA5C
										ENSG00000225216	4.82602	2.08975	0.188872	11.0644	1.86751e-28	3.55412e-27	ENSG00000225216	AC007362.1
										ENSG00000258168	32.5878	1.26062	0.113963	11.0617	1.92416e-28	3.65768e-27	ENSG00000258168	AC025569.1
										ENSG00000270421	2.3126	5.27693	0.477091	11.0606	1.94745e-28	3.70053e-27	ENSG00000270421	AC022022.2
										ENSG00000273289	10.6942	1.37918	0.12471	11.059	1.98189e-28	3.76451e-27	ENSG00000273289	AL121672.3
										ENSG00000271664	12.691	1.27017	0.114894	11.0551	2.07026e-28	3.93085e-27	ENSG00000271664	AC004890.3
										ENSG00000240328	1.35033	3.34709	0.30285	11.052	2.14496e-28	4.06956e-27	ENSG00000240328	AC091805.1
										ENSG00000274841	1.48683	2.923	0.264491	11.0514	2.15829e-28	4.09169e-27	ENSG00000274841	RF00017
										ENSG00000260977	14.6147	1.05136	0.0951351	11.0512	2.16317e-28	4.09936e-27	ENSG00000260977	AC016722.3
										ENSG00000273399	6.07405	1.45083	0.131305	11.0493	2.20808e-28	4.18286e-27	ENSG00000273399	AL159169.3
										ENSG00000166743	224.283	1.56602	0.141735	11.0489	2.21965e-28	4.20316e-27	ENSG00000166743	ACSM1
										ENSG00000279181	1.24728	2.89016	0.261609	11.0476	2.25108e-28	4.25941e-27	ENSG00000279181	AC110801.1
										ENSG00000255122	9.17121	1.53882	0.139321	11.0451	2.3148e-28	4.3766e-27	ENSG00000255122	AC068587.2
										ENSG00000240925	1.6318	4.14516	0.375319	11.0444	2.33374e-28	4.41073e-27	ENSG00000240925	RPS20P31
										ENSG00000265337	1.49686	3.67839	0.33311	11.0426	2.38156e-28	4.49764e-27	ENSG00000265337	AC079336.3
										ENSG00000254463	6.77363	1.59106	0.144102	11.0412	2.41833e-28	4.56534e-27	ENSG00000254463	PPIAP41
										ENSG00000099869	13.0313	1.80066	0.163129	11.0382	2.4986e-28	4.71507e-27	ENSG00000099869	IGF2-AS
										ENSG00000254898	1.74542	2.99678	0.271543	11.0361	2.55926e-28	4.82768e-27	ENSG00000254898	AC087362.1
										ENSG00000267039	2.04263	5.0554	0.458081	11.036	2.5605e-28	4.82818e-27	ENSG00000267039	AC016493.1
										ENSG00000232778	1.80445	3.07493	0.278666	11.0345	2.60515e-28	4.91049e-27	ENSG00000232778	RPL23AP50
										ENSG00000241211	2.09101	4.20867	0.381467	11.0328	2.65329e-28	4.9974e-27	ENSG00000241211	IQCJ-SCHIP1-AS1
										ENSG00000255520	2.2303	2.21547	0.200808	11.0328	2.65551e-28	4.99968e-27	ENSG00000255520	AC090589.2
										ENSG00000271765	1.6856	3.86426	0.350262	11.0325	2.66435e-28	5.0144e-27	ENSG00000271765	RN7SKP299
										ENSG00000197582	33.4063	1.63031	0.147795	11.0309	2.71142e-28	5.10103e-27	ENSG00000197582	GPX1P1
										ENSG00000270661	4.98035	1.93425	0.175361	11.0301	2.7368e-28	5.14682e-27	ENSG00000270661	Z99289.2
										ENSG00000238160	3.45071	2.00636	0.181928	11.0283	2.79076e-28	5.24628e-27	ENSG00000238160	AC116366.2
										ENSG00000142875	4986.4	1.44253	0.130805	11.0281	2.79672e-28	5.25549e-27	ENSG00000142875	PRKACB
										ENSG00000264924	6.96415	1.43621	0.130235	11.0279	2.80454e-28	5.26817e-27	ENSG00000264924	AC090772.1
										ENSG00000234946	2.37541	2.07846	0.188476	11.0277	2.80897e-28	5.27448e-27	ENSG00000234946	SDHCP3
										ENSG00000251441	4.22688	1.49389	0.135471	11.0274	2.81829e-28	5.28995e-27	ENSG00000251441	RTEL1P1
										ENSG00000232891	1.94764	2.56737	0.232834	11.0266	2.84399e-28	5.33616e-27	ENSG00000232891	AL450344.3
										ENSG00000247624	10.8592	1.40509	0.127458	11.024	2.92779e-28	5.48921e-27	ENSG00000247624	CPEB2-AS1
										ENSG00000232458	2.15435	2.4448	0.221773	11.0239	2.93047e-28	5.49215e-27	ENSG00000232458	LINC01450
										ENSG00000259682	1.6277	3.02296	0.274225	11.0236	2.93919e-28	5.50639e-27	ENSG00000259682	AC091231.1
										ENSG00000221869	2419.31	1.10876	0.100598	11.0217	3.00432e-28	5.62627e-27	ENSG00000221869	CEBPD
										ENSG00000234361	1.48202	4.07729	0.369966	11.0207	3.0371e-28	5.68549e-27	ENSG00000234361	AL391863.2
										ENSG00000213432	8.68964	1.13851	0.103314	11.0199	3.06393e-28	5.73353e-27	ENSG00000213432	RPL17P34
										ENSG00000224986	3.81949	1.71038	0.15525	11.0169	3.16775e-28	5.92331e-27	ENSG00000224986	PPP1R8P1
										ENSG00000232633	9.59766	1.51474	0.137504	11.016	3.20051e-28	5.98231e-27	ENSG00000232633	AC079465.1
										ENSG00000270553	1.76561	2.40779	0.218619	11.0136	3.2848e-28	6.13752e-27	ENSG00000270553	AC011921.3
										ENSG00000250551	3.47662	1.83141	0.166291	11.0132	3.2989e-28	6.16153e-27	ENSG00000250551	MIR583HG
										ENSG00000230262	7.07926	1.10089	0.0999649	11.0127	3.31744e-28	6.19381e-27	ENSG00000230262	MIRLET7DHG
										ENSG00000203801	4.93612	1.59847	0.145163	11.0116	3.36102e-28	6.2728e-27	ENSG00000203801	LINC00222
										ENSG00000267586	11.5582	1.37509	0.124905	11.0091	3.45248e-28	6.43824e-27	ENSG00000267586	LINC00907
										ENSG00000262516	1.90624	3.40199	0.309168	11.0037	3.66845e-28	6.8362e-27	ENSG00000262516	AC007151.1
										ENSG00000267262	1.3262	2.60501	0.236751	11.0032	3.69011e-28	6.87396e-27	ENSG00000267262	AC011444.2
										ENSG00000230184	2.56661	2.67449	0.243135	11	3.82081e-28	7.11475e-27	ENSG00000230184	SMYD3-IT1
										ENSG00000201592	1.66214	3.18622	0.289679	10.9991	3.85879e-28	7.18276e-27	ENSG00000201592	RF00494
										ENSG00000131730	98.4065	1.10305	0.100291	10.9985	3.88687e-28	7.23229e-27	ENSG00000131730	CKMT2
										ENSG00000204464	3.09489	2.32179	0.211112	10.9979	3.91224e-28	7.274e-27	ENSG00000204464	C1orf195
										ENSG00000200575	1.78161	4.50089	0.409262	10.9976	3.92466e-28	7.29432e-27	ENSG00000200575	RNU6-414P
										ENSG00000170092	32.9519	1.05142	0.0956093	10.9971	3.94795e-28	7.33485e-27	ENSG00000170092	SPDYE5
										ENSG00000229742	1.5911	3.16352	0.287682	10.9966	3.96883e-28	7.37086e-27	ENSG00000229742	AC092809.1
										ENSG00000222460	4.43544	1.72377	0.156837	10.9909	4.22868e-28	7.85049e-27	ENSG00000222460	RN7SKP271
										ENSG00000278637	2.95289	2.27297	0.206814	10.9904	4.24947e-28	7.88611e-27	ENSG00000278637	HIST1H4A
										ENSG00000258323	1.66471	2.58613	0.235364	10.9878	4.37529e-28	8.11348e-27	ENSG00000258323	AC073575.1
										ENSG00000253539	2.38483	3.20913	0.292096	10.9866	4.43546e-28	8.22197e-27	ENSG00000253539	AC018442.2
[truncated: 8,247 more rows]
